# Supplementary material for: Evaluation of using the time-dependent density functional theory in studying the fluorescence properties of coumarin derivatives
Source: Royal Society of Chemistry journal article supplement (doi:10.1039/d3nj05220f), 2023-12-11
Supplement: d3nj05220f1.pdf [file d3nj05220f1.pdf]

**Supplementary Data for**  
**Evaluation of using the time-dependent density functional theory in**  
**studying fluorescence properties of coumarin derivatives**

Nguyen Khoa Hien<sup>1</sup>, Mai Van Bay<sup>2</sup>, Quan V. Vo<sup>3</sup>, Ngo Duy Y<sup>4</sup>, Duong Tuan Quang<sup>4\*</sup>, and Pham  
Cam Nam<sup>5\*</sup>

<sup>1</sup>Mientrung Institute for Scientific Research, Vietnam National Museum of Nature Vietnam  
Academy of Science and Technology, Hue 530000, Vietnam

<sup>2</sup>The University of Danang, University of Science and Education, Danang 550000, Vietnam

<sup>3</sup>Faculty of Chemical Technology-Environment, The University of Danang - University of  
Technology and Education, 48 Cao Thang, Danang 550000, Vietnam.

<sup>4</sup>Department of Chemistry, Hue University, Hue 530000, Vietnam

<sup>5</sup>The University of Danang – University of Science and Technology, Danang 550000, Vietnam

\*Corresponding author: [duongtuanquang@hueuni.edu.vn](mailto:duongtuanquang@hueuni.edu.vn); [pcnam@dut.udn.vn](mailto:pcnam@dut.udn.vn)

## S1. Structures of investigated coumarin derivatives

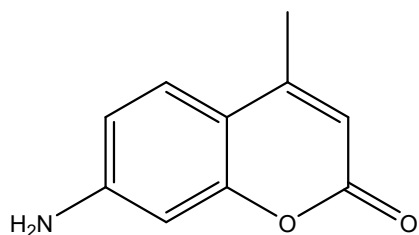

7-Amino-4-methylcoumarin (F1)

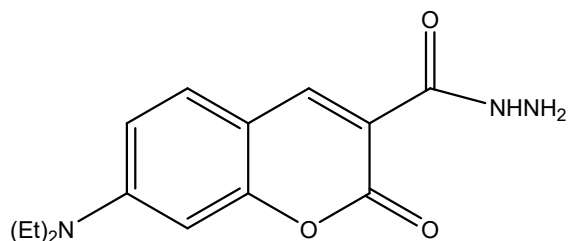

7-Diethylaminocoumarin-3-carboxylic acid hydrazide (F2)

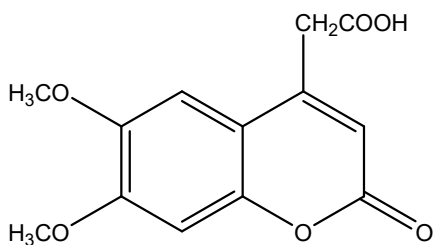

6,7-Dimethoxycoumarin-4-acetic acid (F3)

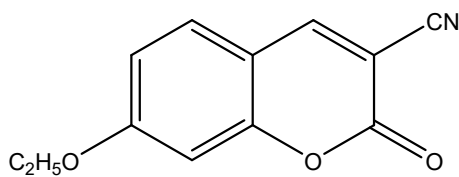

3-Cyano-7-ethoxycoumarin (F4)

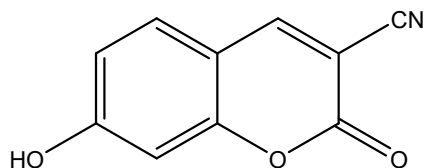

3-Cyano-7-hydroxycoumarin (F5)

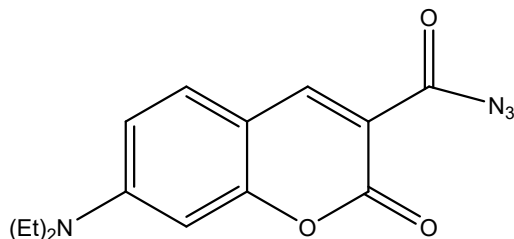

7-Diethylaminocoumarin-3-carbonyl azide (F6)

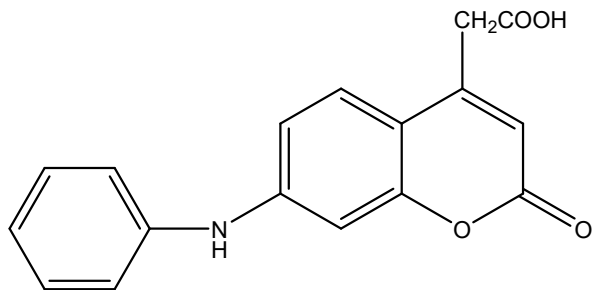

7-Anilincoumarin-4-acetic acid (F7)

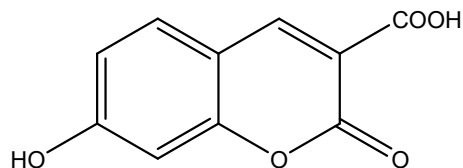

7-hydroxycoumarin-3-carboxylic acid (F8)

**Fig.S1.** Structure of investigated coumarin derivatives **F1-F8**

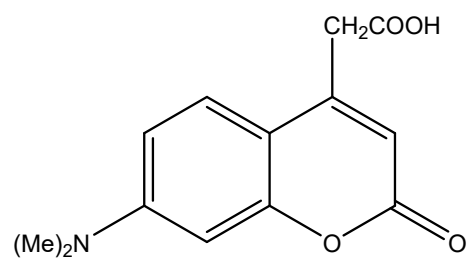

7-Dimethylaminocoumarin-4-acetic acid (**F9**)

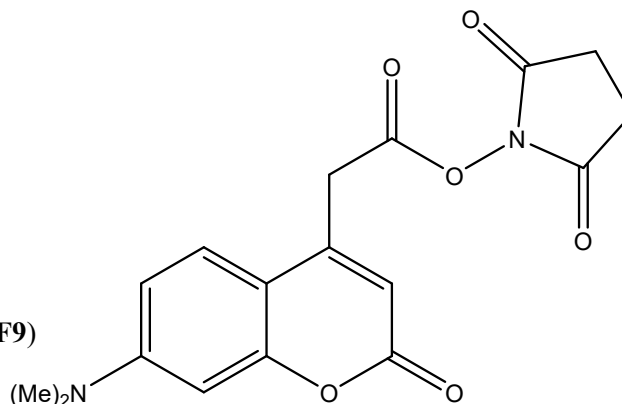

7-Dimethylaminocoumarin-4-acetic acid succinimidyl ester (**F10**)

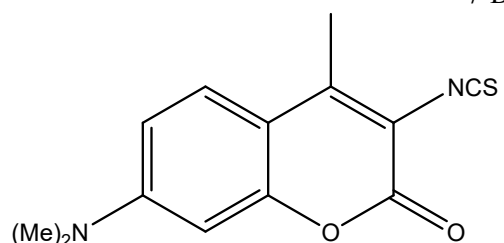

7-Dimethylamino-4-methylcoumarin-3-isothiocyanate (DACITC) (**F11**)

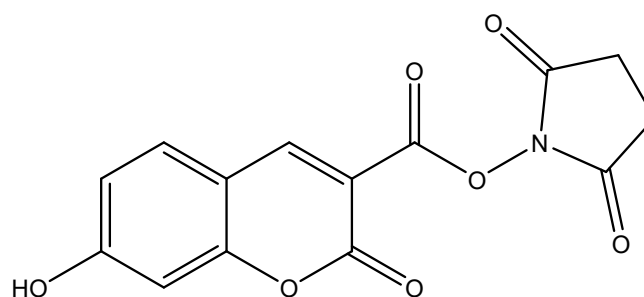

7-Hydroxycoumarin-3-carboxylic acid succinimidyl ester (**F12**)

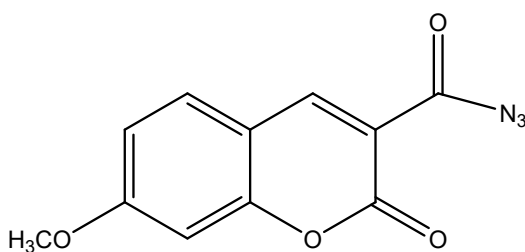

7-Methoxycoumarin-3-carbonyl azide (**F13**)

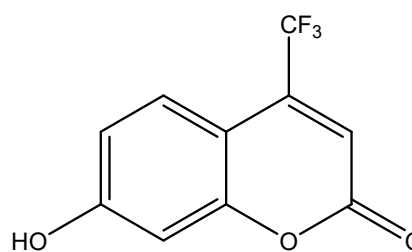

7-Hydroxy-4-(trifluoromethyl)coumarin (**F14**)

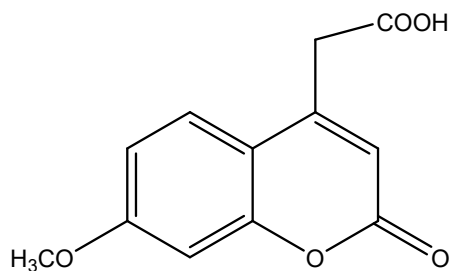

7-Methoxycoumarin-4-acetic acid (**F15**)

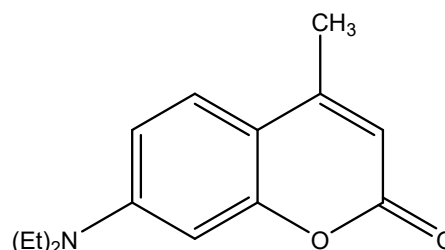

7-(Diethylamino)-4-methylcoumarin (**F16**)

**Fig.S2.** Structure of investigated coumarin derivatives **F9-F16**

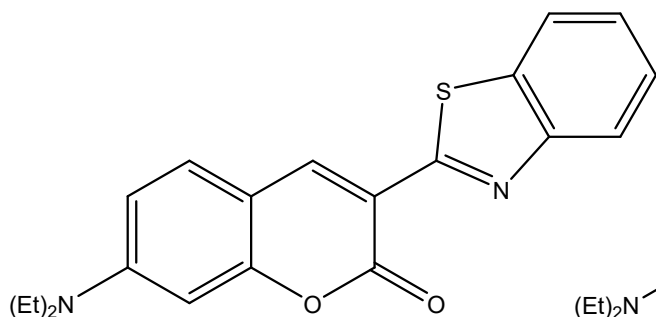

Coumarin 6 (F17)

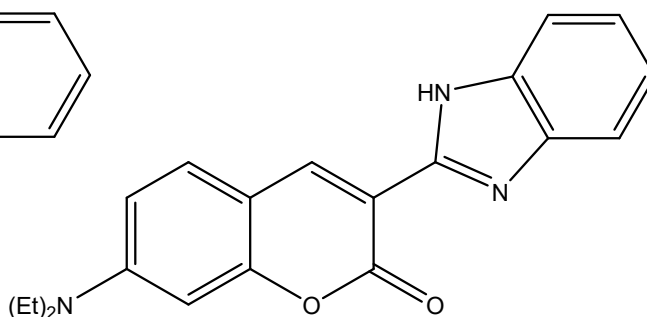

Coumarin 7 (F18)

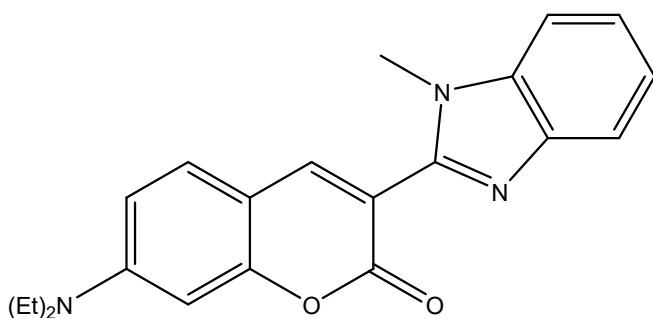

Coumarin 30 (F19)

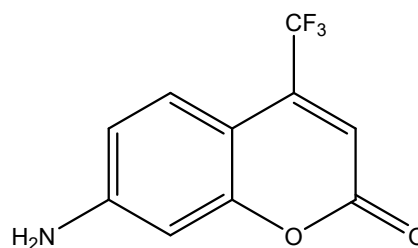

Coumarin 151 (F20)

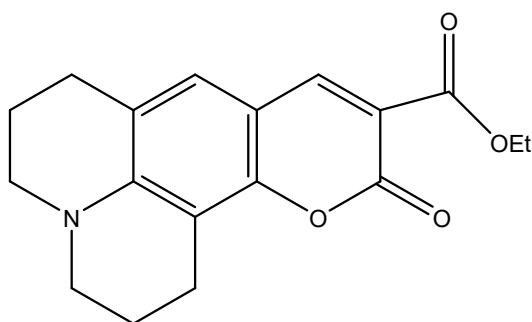

Coumarin 314 (F21)

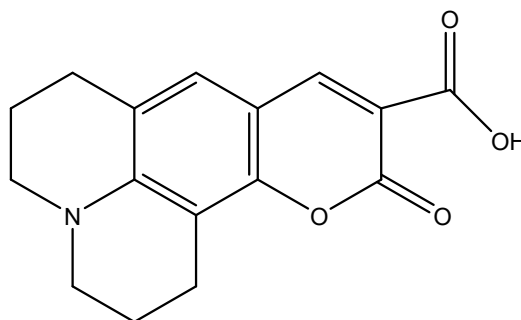

Coumarin 343 (F22)

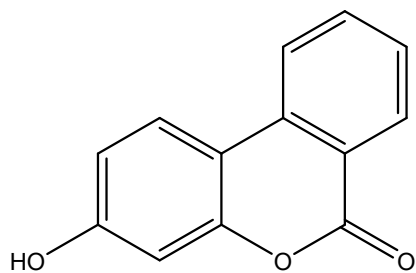

Urolithin B (F23)

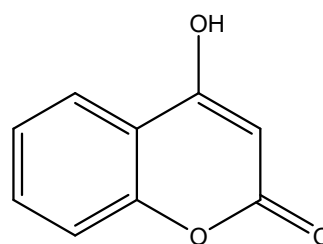

4-Hydroxycoumarin (F24)

**Fig.S3. Structure of investigated coumarin derivatives F17-F24**

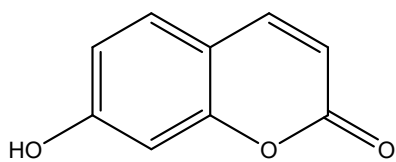

7-Hydroxycoumarin (**F25**)

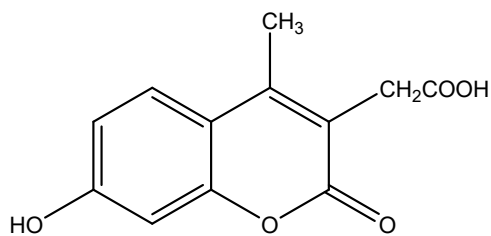

7-hydroxy-4-methylcoumarin-3-acetic acid (**F26**)

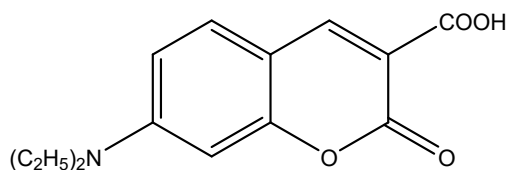

7-diethylaminocoumarin-3-carboxylic acid (**F27**)

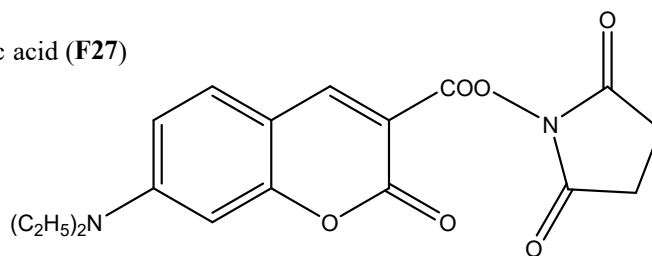

7-diethylaminocoumarin-3-carboxylic acid succinimidyl ester (**F28**)

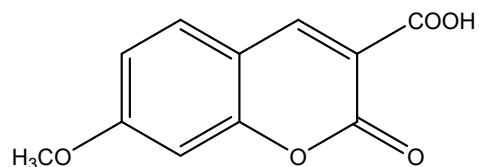

7-methoxycoumarin-3-carboxylic acid (**F29**)

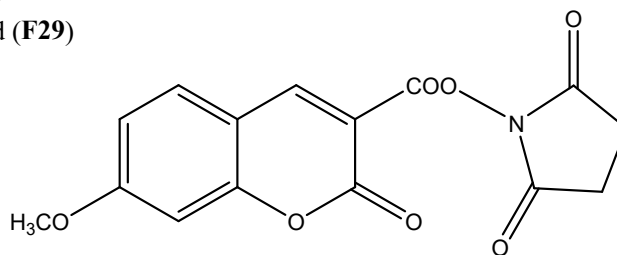

7-methoxycoumarin-3-carboxylic acid succinimidyl ester (**F30**)

**Fig.S4.** Structure of investigated coumarin derivatives **F25-F30**

## S2. The paired *t*-test method for comparing pairs of values

The following table gives the values of factor determined by two different method for n test samples:



|                                            |        |       |        |        |       |       |       |       |       |       |
|--------------------------------------------|--------|-------|--------|--------|-------|-------|-------|-------|-------|-------|
| Samples                                    | 1      | 2     | 3      | 4      | 5     | 6     | 7     | 8     | 9     | 10    |
| RMSM (1)                                   | 64     | 96    | 61     | 78     | 60    | 78    | 96    | 63    | 62    | 80    |
| RMSM (2)                                   | 164    | 104   | 360    | 482    | 50    | 81    | 105   | 68    | 63    | 80    |
| $d_i = \text{RMSM}(1) - \text{RMSM}(2)$    | -40.15 | 20.85 | -34.31 | -47.77 | -44.1 | -3.21 | -9.12 | 0.41  | -0.47 | -3.36 |
| MSE (1)                                    | 46.78  | 37    | -31    | -80    | -47   | -79   | 39    | -40   | -51   | -81   |
| MSE (2)                                    | 2.93   | -5.07 | 4.09   | -1.99  | 2.57  | -0.43 | -6.94 | 2.79  | 2.62  | -0.58 |
| $\sum (d_i - \bar{d})$                     | -0.14  | 17.16 | -3.14  | 5.20   | 2.82  | 3.64  | 19.32 | -1.46 | 4.36  | 3.70  |
| $\sum (d_i - \bar{d})^2$                   | 124.84 |       |        |        |       |       |       |       |       |       |
| $S_d$                                      | 3.72   |       |        |        |       |       |       |       |       |       |
| $ t  = \frac{\bar{d}}{S_d} \text{ (RMSM)}$ | 2.01   | 15.01 | -0.99  | 7.35   | 4.97  | 5.79  | 17.17 | 0.69  | 6.51  | 5.85  |
| $\sum (d_i - \bar{d})^2$                   | 714.46 |       |        |        |       |       |       |       |       |       |
| $S_d$                                      | 8.91   |       |        |        |       |       |       |       |       |       |
| $ t $ (MSE)                                | 0.76   |       |        |        |       |       |       |       |       |       |

### S3. The coordinates of the optimized structures for the Ground State (GS) and Excited State (ES) of the studied compounds

#### S3-F1. The coordinates of the optimized structures for the GS and ES of F1 compound

##### \* GS of F1 at PBE0/6-311++G(d,p)

|   |             |             |             |
|---|-------------|-------------|-------------|
| O | 0.83407000  | -1.55474900 | 0.00014500  |
| O | 2.97798400  | -2.07058500 | 0.00068200  |
| N | -3.83351100 | -0.78799000 | -0.00135100 |
| C | 0.07321700  | 0.72866700  | -0.00006700 |
| C | 1.44008300  | 1.16871300  | 0.00021000  |
| C | -0.18398300 | -0.65198100 | -0.00008200 |
| C | -1.04595600 | 1.58148900  | -0.00028100 |
| C | -1.46522100 | -1.17234400 | -0.00028100 |
| C | -2.56508700 | -0.30526400 | -0.00049600 |
| C | 2.42937300  | 0.23328800  | 0.00044700  |
| C | -2.32914600 | 1.09009700  | -0.00050500 |
| C | 1.76453300  | 2.62705600  | 0.00026000  |
| C | 2.15662700  | -1.17586600 | 0.00039700  |
| H | -0.89450600 | 2.65532400  | -0.00025500 |
| H | -1.60065200 | -2.24819600 | -0.00027600 |
| H | 3.47549300  | 0.51389500  | 0.00067500  |
| H | -3.17295200 | 1.77220800  | -0.00070800 |
| H | 1.33969500  | 3.11942800  | 0.88048700  |
| H | 1.34013800  | 3.11938900  | -0.88020300 |
| H | 2.84289500  | 2.78729400  | 0.00052800  |
| H | -4.01490800 | -1.77629500 | 0.00246000  |
| H | -4.62370700 | -0.16757600 | 0.00251800  |

**\* GS of F1 at APFD/6-311++G(d,p)**

|   |             |             |             |
|---|-------------|-------------|-------------|
| O | 0.83311300  | -1.56035300 | -0.00012800 |
| O | 2.98716600  | -2.06668800 | 0.00025100  |
| N | -3.83446500 | -0.79056200 | -0.00093300 |
| C | 0.07177600  | 0.73027900  | -0.00010000 |
| C | 1.43873300  | 1.16932100  | 0.00000900  |
| C | -0.18439400 | -0.65368400 | -0.00011700 |
| C | -1.04797200 | 1.58325600  | -0.00006900 |
| C | -1.46551500 | -1.17475800 | -0.00008900 |
| C | -2.56573700 | -0.30634100 | -0.00007900 |
| C | 2.43128500  | 0.23610100  | 0.00003800  |
| C | -2.33193600 | 1.09048300  | -0.00007900 |
| C | 1.76168200  | 2.62923700  | 0.00014700  |
| C | 2.15979500  | -1.17582100 | -0.00020400 |
| H | -0.89621900 | 2.65730900  | -0.00000500 |
| H | -1.60065900 | -2.25104800 | -0.00009300 |
| H | 3.47745200  | 0.51770200  | 0.00022800  |
| H | -3.17677500 | 1.77213600  | -0.00010300 |
| H | 1.33576900  | 3.12105200  | 0.88037300  |
| H | 1.33591200  | 3.12120000  | -0.88006500 |
| H | 2.83940400  | 2.79449900  | 0.00025200  |
| H | -4.01576000 | -1.77928100 | 0.00396400  |
| H | -4.62640700 | -0.17175300 | 0.00426200  |

**\* GS of F1 at B3LYP/6-311++G(d,p)**

|   |             |             |             |
|---|-------------|-------------|-------------|
| O | 0.83732500  | -1.56285200 | 0.00010500  |
| O | 2.99499000  | -2.07573100 | -0.00040800 |
| N | -3.85027200 | -0.79048400 | -0.00134200 |
| C | 0.07193700  | 0.73090700  | 0.00006600  |
| C | 1.44348700  | 1.17089400  | 0.00008500  |
| C | -0.18881000 | -0.65393900 | -0.00003200 |
| C | -1.05156100 | 1.58595400  | 0.00003200  |
| C | -1.47269100 | -1.17544800 | -0.00014100 |
| C | -2.57500400 | -0.30560600 | -0.00016000 |
| C | 2.43701900  | 0.23479100  | 0.00014300  |
| C | -2.33776700 | 1.09310500  | -0.00007600 |
| C | 1.77357700  | 2.63675000  | -0.00007100 |
| C | 2.17024100  | -1.17817500 | 0.00064100  |
| H | -0.90238900 | 2.65846300  | 0.00010200  |



|   |             |             |             |
|---|-------------|-------------|-------------|
| H | -1.60910000 | -2.25002300 | -0.00020300 |
| H | 3.48131900  | 0.51783400  | -0.00011600 |
| H | -3.18047100 | 1.77482900  | -0.00015500 |
| H | 1.35229000  | 3.13124100  | 0.87997500  |
| H | 1.35235200  | 3.13101000  | -0.88027500 |
| H | 2.85200400  | 2.79308400  | -0.00005600 |
| H | -4.03317100 | -1.77981300 | 0.00461400  |
| H | -4.64201900 | -0.16998100 | 0.00501000  |

**\* GS of F1 at BP86/6-311++G(d,p)**

|   |             |             |             |
|---|-------------|-------------|-------------|
| O | 0.84283500  | -1.57600900 | -0.00013200 |
| O | 3.02538400  | -2.08121000 | 0.00023400  |
| N | -3.86708600 | -0.80100100 | -0.00153900 |
| C | 0.07132500  | 0.73580900  | -0.00010300 |
| C | 1.44146700  | 1.18280200  | 0.00001900  |
| C | -0.18820700 | -0.66090100 | -0.00014000 |
| C | -1.06096000 | 1.59256400  | -0.00005400 |
| C | -1.47815100 | -1.18654500 | -0.00010900 |
| C | -2.58901300 | -0.31279200 | -0.00009900 |
| C | 2.44879400  | 0.24211800  | 0.00006200  |
| C | -2.35321600 | 1.09468900  | -0.00007600 |
| C | 1.76786000  | 2.65263700  | 0.00014300  |
| C | 2.19560700  | -1.17401400 | -0.00013000 |
| H | -0.91098500 | 2.67437100  | 0.00005900  |
| H | -1.61428700 | -2.27017500 | -0.00011700 |
| H | 3.49916800  | 0.53835100  | 0.00023800  |
| H | -3.20436600 | 1.78026800  | -0.00011500 |
| H | 1.34174400  | 3.15188400  | 0.88613000  |
| H | 1.34192400  | 3.15200800  | -0.88586000 |
| H | 2.85408900  | 2.81477400  | 0.00026800  |
| H | -4.05050200 | -1.79853900 | 0.00587900  |
| H | -4.66596400 | -0.17638200 | 0.00640200  |

**\* GS of F1 at CAM-B3LYP/6-311++G(d,p)**

|   |             |             |             |
|---|-------------|-------------|-------------|
| O | 0.83373600  | -1.55564800 | 0.00017600  |
| O | 2.97646700  | -2.06935400 | -0.00059500 |
| N | -3.83669600 | -0.78414600 | -0.00135400 |
| C | 0.07180800  | 0.72509400  | 0.00011200  |
| C | 1.44488400  | 1.16398900  | 0.00011000  |

|   |             |             |             |
|---|-------------|-------------|-------------|
| C | -0.18795400 | -0.64904200 | -0.00000400 |
| C | -1.04398400 | 1.57928000  | 0.00005700  |
| C | -1.46809200 | -1.16925000 | -0.00017200 |
| C | -2.56296500 | -0.30243500 | -0.00020800 |
| C | 2.42907500  | 0.23410900  | 0.00016800  |
| C | -2.32581600 | 1.09028500  | -0.00009200 |
| C | 1.76830600  | 2.62585300  | -0.00012300 |
| C | 2.15413000  | -1.17852500 | 0.00087600  |
| H | -0.89198900 | 2.65093500  | 0.00012200  |
| H | -1.60409600 | -2.24323100 | -0.00025700 |
| H | 3.47422600  | 0.51089700  | -0.00020900 |
| H | -3.16770300 | 1.77191900  | -0.00018400 |
| H | 1.34451900  | 3.11572000  | 0.87937200  |
| H | 1.34454100  | 3.11539200  | -0.87981000 |
| H | 2.84504200  | 2.78573200  | -0.00014300 |
| H | -4.01966600 | -1.77263200 | 0.00461000  |
| H | -4.62599300 | -0.16183600 | 0.00499000  |

**\* GS of F1 at M06/6-311++G(d,p)**

|   |             |             |             |
|---|-------------|-------------|-------------|
| O | 0.83695200  | -1.55184700 | -0.00011000 |
| O | 2.98238700  | -2.06210300 | 0.00022500  |
| N | -3.82955900 | -0.79061000 | -0.00090200 |
| C | 0.07095000  | 0.72634900  | -0.00008100 |
| C | 1.43606100  | 1.16729700  | 0.00000900  |
| C | -0.18394700 | -0.65259900 | -0.00010100 |
| C | -1.04684000 | 1.57816200  | -0.00004900 |
| C | -1.46317700 | -1.17233100 | -0.00008100 |
| C | -2.56069700 | -0.30665000 | -0.00007900 |
| C | 2.42603600  | 0.23680000  | 0.00003000  |
| C | -2.32736400 | 1.08640600  | -0.00006400 |
| C | 1.75426200  | 2.62316300  | 0.00012300  |
| C | 2.16058800  | -1.17237300 | -0.00017900 |
| H | -0.89530000 | 2.65311700  | 0.00001500  |
| H | -1.59991100 | -2.24928100 | -0.00009500 |
| H | 3.47248900  | 0.52143400  | 0.00019400  |
| H | -3.17531200 | 1.76498900  | -0.00008500 |
| H | 1.32715700  | 3.11568300  | 0.88025000  |
| H | 1.32726900  | 3.11580700  | -0.87998900 |
| H | 2.83262800  | 2.78982400  | 0.00020700  |
| H | -4.00990000 | -1.78130400 | 0.00372200  |

|   |             |             |            |
|---|-------------|-------------|------------|
| H | -4.62214800 | -0.16974700 | 0.00400500 |
|---|-------------|-------------|------------|

**\* GS of F1 at M06-2X/6-311++G(d,p)**

|   |             |             |             |
|---|-------------|-------------|-------------|
| O | 0.83608300  | -1.55814300 | 0.00016500  |
| O | 2.97815900  | -2.06816200 | -0.00059900 |
| N | -3.83683400 | -0.78698600 | -0.00141900 |
| C | 0.07240700  | 0.72484600  | 0.00008900  |
| C | 1.44712700  | 1.16687800  | 0.00011200  |
| C | -0.18499400 | -0.65263200 | -0.00002400 |
| C | -1.04381600 | 1.58181200  | 0.00003200  |
| C | -1.46722400 | -1.17486000 | -0.00018200 |
| C | -2.56384900 | -0.30461000 | -0.00019900 |
| C | 2.43435900  | 0.23830600  | 0.00017900  |
| C | -2.32849000 | 1.09167100  | -0.00010600 |
| C | 1.75919300  | 2.63305900  | -0.00010100 |
| C | 2.15585000  | -1.18082300 | 0.00089700  |
| H | -0.88914700 | 2.65418400  | 0.00009400  |
| H | -1.60342200 | -2.24930000 | -0.00025200 |
| H | 3.48064900  | 0.51289600  | -0.00018300 |
| H | -3.17259800 | 1.77095400  | -0.00019900 |
| H | 1.32768000  | 3.11477200  | 0.88060500  |
| H | 1.32772700  | 3.11446400  | -0.88099700 |
| H | 2.83482300  | 2.79998200  | -0.00010500 |
| H | -4.01869000 | -1.77619200 | 0.00492000  |
| H | -4.62650000 | -0.16430500 | 0.00534900  |

**\* GS of F1 at PBE/6-311++G(d,p)**

|   |             |             |             |
|---|-------------|-------------|-------------|
| O | 0.84174800  | -1.57305600 | -0.00012800 |
| O | 3.02061800  | -2.07903500 | 0.00022600  |
| N | -3.86123300 | -0.80035400 | -0.00147500 |
| C | 0.07150100  | 0.73530300  | -0.00010200 |
| C | 1.43974000  | 1.18192300  | 0.00001600  |
| C | -0.18688000 | -0.65987600 | -0.00013600 |
| C | -1.05949000 | 1.59067000  | -0.00005500 |
| C | -1.47563300 | -1.18464300 | -0.00010100 |
| C | -2.58561900 | -0.31270100 | -0.00009200 |
| C | 2.44533200  | 0.24149100  | 0.00005900  |
| C | -2.35014300 | 1.09303500  | -0.00007300 |
| C | 1.76530000  | 2.64864900  | 0.00014100  |

|   |             |             |             |
|---|-------------|-------------|-------------|
| C | 2.19119400  | -1.17276300 | -0.00012700 |
| H | -0.90968200 | 2.67206600  | 0.00005200  |
| H | -1.61135900 | -2.26794700 | -0.00010200 |
| H | 3.49539500  | 0.53706000  | 0.00023100  |
| H | -3.20119900 | 1.77802600  | -0.00010700 |
| H | 1.33865200  | 3.14771300  | 0.88517700  |
| H | 1.33882200  | 3.14784000  | -0.88490500 |
| H | 2.85075200  | 2.81139100  | 0.00026000  |
| H | -4.04400300 | -1.79711300 | 0.00563100  |
| H | -4.65948100 | -0.17635700 | 0.00612700  |

**\* GS of F1 at PW6B95D3/6-311++G(d,p)**

|   |             |             |             |
|---|-------------|-------------|-------------|
| O | 0.83549900  | -1.55155600 | -0.00011400 |
| O | 2.97829200  | -2.06216800 | 0.00021200  |
| N | -3.82597600 | -0.78934200 | -0.00096800 |
| C | 0.07175800  | 0.72548800  | -0.00008800 |
| C | 1.43536300  | 1.16576800  | 0.00001300  |
| C | -0.18414200 | -0.65070300 | -0.00010900 |
| C | -1.04450500 | 1.57650300  | -0.00005600 |
| C | -1.46140800 | -1.17115100 | -0.00009200 |
| C | -2.55836100 | -0.30652400 | -0.00008500 |
| C | 2.42443900  | 0.23646100  | 0.00004400  |
| C | -2.32424100 | 1.08549400  | -0.00007500 |
| C | 1.75238500  | 2.62397000  | 0.00012800  |
| C | 2.15619200  | -1.17088600 | -0.00015300 |
| H | -0.89259100 | 2.64532600  | 0.00001200  |
| H | -1.59556300 | -2.24208100 | -0.00010200 |
| H | 3.46492000  | 0.51873400  | 0.00020700  |
| H | -3.16518800 | 1.76311200  | -0.00009000 |
| H | 1.32523800  | 3.11027000  | 0.87662100  |
| H | 1.32540200  | 3.11038500  | -0.87638100 |
| H | 2.82508000  | 2.78868300  | 0.00024100  |
| H | -4.00670500 | -1.77451800 | 0.00402100  |
| H | -4.61396100 | -0.17124800 | 0.00430000  |

**\* GS of F1 at WB97XD/6-311++G(d,p)**

|   |             |             |             |
|---|-------------|-------------|-------------|
| O | 0.83301500  | -1.55669200 | 0.00007400  |
| O | 2.97401300  | -2.07257200 | -0.00030300 |
| N | -3.83724900 | -0.78474900 | -0.00125500 |

|   |             |             |             |
|---|-------------|-------------|-------------|
| C | 0.07308400  | 0.72574900  | 0.00003600  |
| C | 1.44710300  | 1.16607400  | 0.00007500  |
| C | -0.18516300 | -0.65036400 | -0.00003600 |
| C | -1.04330200 | 1.58141900  | 0.00000400  |
| C | -1.46771700 | -1.17134300 | -0.00012600 |
| C | -2.56374900 | -0.30278900 | -0.00016200 |
| C | 2.43152400  | 0.23390800  | 0.00011800  |
| C | -2.32681500 | 1.09218900  | -0.00009800 |
| C | 1.76755300  | 2.62976100  | -0.00001400 |
| C | 2.15272000  | -1.18064300 | 0.00048000  |
| H | -0.89139000 | 2.65427000  | 0.00006200  |
| H | -1.60465400 | -2.24593500 | -0.00017700 |
| H | 3.47797700  | 0.50945000  | -0.00005600 |
| H | -3.16861400 | 1.77509600  | -0.00017700 |
| H | 1.34011200  | 3.11620200  | 0.88088300  |
| H | 1.34015500  | 3.11606600  | -0.88100500 |
| H | 2.84456800  | 2.79389000  | 0.00000000  |
| H | -4.01926400 | -1.77246900 | 0.00457300  |
| H | -4.62580300 | -0.16296900 | 0.00485200  |

**\* ES of F1 at PBE0/6-311++G(d,p)**

|   |             |             |             |
|---|-------------|-------------|-------------|
| O | 0.84036300  | -1.57681100 | 0.00017400  |
| O | 3.00549300  | -2.07584800 | 0.00006000  |
| N | -3.80812100 | -0.82883700 | -0.00025300 |
| C | 0.07129600  | 0.73727800  | -0.00001200 |
| C | 1.41760500  | 1.21163300  | 0.00004200  |
| C | -0.17134900 | -0.67174200 | 0.00002500  |
| C | -1.07334800 | 1.58785200  | -0.00020100 |
| C | -1.44333800 | -1.18399000 | -0.00004600 |
| C | -2.56543700 | -0.31244300 | -0.00011000 |
| C | 2.42846500  | 0.23343600  | 0.00020800  |
| C | -2.35462800 | 1.08818800  | -0.00025200 |
| C | 1.72208700  | 2.66726800  | -0.00013800 |
| C | 2.18699000  | -1.15606100 | 0.00046900  |
| H | -0.92253400 | 2.66078600  | -0.00030300 |
| H | -1.58471000 | -2.25902900 | 0.00001200  |
| H | 3.47304400  | 0.52647800  | 0.00013500  |
| H | -3.20766600 | 1.75815700  | -0.00041000 |
| H | 1.30271400  | 3.17562800  | 0.87968200  |
| H | 1.30288300  | 3.17538500  | -0.88017900 |

|   |             |             |             |
|---|-------------|-------------|-------------|
| H | 2.80030900  | 2.83771900  | -0.00006100 |
| H | -3.96109200 | -1.82552400 | 0.00054700  |
| H | -4.62300500 | -0.23497800 | 0.00055900  |

**\* ES of F1 at APFD/6-311++G(d,p)**

|   |             |             |             |
|---|-------------|-------------|-------------|
| O | 0.83810000  | -1.58156500 | 0.00018300  |
| O | 3.01488900  | -2.07302200 | -0.00001500 |
| N | -3.81085600 | -0.82974600 | -0.00022700 |
| C | 0.06935900  | 0.73708600  | 0.00001000  |
| C | 1.41830000  | 1.21138400  | 0.00004400  |
| C | -0.17244600 | -0.67301700 | 0.00003400  |
| C | -1.07410200 | 1.58822100  | -0.00017400 |
| C | -1.44541600 | -1.18607200 | -0.00004200 |
| C | -2.56685700 | -0.31279600 | -0.00010300 |
| C | 2.43166100  | 0.23718600  | 0.00021100  |
| C | -2.35727000 | 1.08851000  | -0.00022800 |
| C | 1.72008500  | 2.66854000  | -0.00017800 |
| C | 2.19196800  | -1.15551500 | 0.00053100  |
| H | -0.92242800 | 2.66132400  | -0.00027000 |
| H | -1.58656800 | -2.26149600 | 0.00000500  |
| H | 3.47606800  | 0.53175000  | 0.00009400  |
| H | -3.21058500 | 1.75880100  | -0.00037900 |
| H | 1.29901200  | 3.17636300  | 0.87946100  |
| H | 1.29915300  | 3.17607500  | -0.88005100 |
| H | 2.79762100  | 2.84403800  | -0.00012400 |
| H | -3.96523200 | -1.82660900 | 0.00043100  |
| H | -4.62666000 | -0.23649000 | 0.00044300  |

**\* ES of F1 at B3LYP/6-311++G(d,p)**

|   |             |             |             |
|---|-------------|-------------|-------------|
| O | 0.84100100  | -1.58438800 | 0.00019600  |
| O | 3.02343800  | -2.08292400 | 0.00006100  |
| N | -3.82721100 | -0.83015800 | -0.00027700 |
| C | 0.06820500  | 0.73769200  | 0.00000600  |
| C | 1.42624400  | 1.21306600  | 0.00002900  |
| C | -0.17659500 | -0.67147500 | 0.00004000  |
| C | -1.07784400 | 1.59057900  | -0.00016000 |
| C | -1.45336300 | -1.18567300 | -0.00003600 |
| C | -2.57742900 | -0.31095400 | -0.00010800 |
| C | 2.43781100  | 0.23506700  | 0.00018900  |
| C | -2.36443300 | 1.09184000  | -0.00021500 |

|   |             |             |             |
|---|-------------|-------------|-------------|
| C | 1.73395700  | 2.67541700  | -0.00018500 |
| C | 2.20258100  | -1.15855900 | 0.00047900  |
| H | -0.92842600 | 2.66217700  | -0.00024000 |
| H | -1.59583100 | -2.25929600 | 0.00001000  |
| H | 3.48050600  | 0.53103300  | 0.00008800  |
| H | -3.21497900 | 1.76297900  | -0.00035200 |
| H | 1.31611400  | 3.18548500  | 0.87915100  |
| H | 1.31622700  | 3.18520900  | -0.87973600 |
| H | 2.81199600  | 2.84416200  | -0.00014500 |
| H | -3.98176300 | -1.82791700 | 0.00043800  |
| H | -4.64368300 | -0.23623500 | 0.00042800  |

**\* ES of F1 at BP86/6-311++G(d,p)**

|   |             |             |             |
|---|-------------|-------------|-------------|
| O | 0.82915400  | -1.59450900 | -0.00009800 |
| O | 3.04401100  | -2.10600600 | 0.00047900  |
| N | -3.85421500 | -0.83809500 | -0.00005200 |
| C | 0.06078300  | 0.73222900  | -0.00015400 |
| C | 1.46123200  | 1.22015900  | -0.00007200 |
| C | -0.17081900 | -0.66191100 | -0.00015200 |
| C | -1.07633900 | 1.58730500  | -0.00003900 |
| C | -1.47692000 | -1.18144400 | -0.00013200 |
| C | -2.59581500 | -0.29722000 | -0.00004600 |
| C | 2.45468300  | 0.23906300  | 0.00028900  |
| C | -2.38621600 | 1.10322200  | -0.00000400 |
| C | 1.74862400  | 2.68588700  | -0.00038100 |
| C | 2.22622700  | -1.16529500 | 0.00035600  |
| H | -0.91669200 | 2.66759700  | 0.00003100  |
| H | -1.62184400 | -2.26379000 | -0.00012900 |
| H | 3.50893200  | 0.53211900  | 0.00049500  |
| H | -3.23680100 | 1.78728800  | 0.00007700  |
| H | 1.31832800  | 3.19840200  | 0.88427800  |
| H | 1.31838500  | 3.19795500  | -0.88532800 |
| H | 2.83265500  | 2.87316200  | -0.00039500 |
| H | -3.99746300 | -1.84615200 | 0.00015200  |
| H | -4.68396400 | -0.24777700 | 0.00013800  |

**\* ES of F1 at CAM-B3LYP/6-311++G(d,p)**

|   |             |             |             |
|---|-------------|-------------|-------------|
| O | 0.84639700  | -1.57878000 | 0.00014500  |
| O | 3.01186700  | -2.06641600 | 0.00008600  |
| N | -3.80557700 | -0.82982100 | -0.00030600 |

|   |             |             |             |
|---|-------------|-------------|-------------|
| C | 0.07480400  | 0.74104100  | -0.00002000 |
| C | 1.39998800  | 1.20996800  | 0.00006900  |
| C | -0.17585400 | -0.67936500 | -0.00000100 |
| C | -1.08127000 | 1.59124400  | -0.00022600 |
| C | -1.43774900 | -1.18950500 | -0.00007300 |
| C | -2.56213600 | -0.31948700 | -0.00012400 |
| C | 2.42744700  | 0.23569000  | 0.00024100  |
| C | -2.34991300 | 1.08476900  | -0.00027500 |
| C | 1.71537900  | 2.66988700  | -0.00009500 |
| C | 2.19109100  | -1.15098400 | 0.00048000  |
| H | -0.93536100 | 2.66260500  | -0.00033600 |
| H | -1.57863500 | -2.26283900 | -0.00001600 |
| H | 3.46700100  | 0.53749200  | 0.00019500  |
| H | -3.20579900 | 1.74882400  | -0.00044600 |
| H | 1.30151500  | 3.17615600  | 0.87934400  |
| H | 1.30174700  | 3.17591900  | -0.87978000 |
| H | 2.79311400  | 2.83138200  | 0.00002300  |
| H | -3.96297200 | -1.82618000 | 0.00069900  |
| H | -4.61839800 | -0.23259600 | 0.00075500  |

**\* ES of F1 at M06/6-311++G(d,p)**

|   |             |             |             |
|---|-------------|-------------|-------------|
| O | 0.84446400  | -1.57275700 | 0.00018500  |
| O | 3.01004700  | -2.06575300 | 0.00004200  |
| N | -3.80461100 | -0.83248100 | -0.00033100 |
| C | 0.07068200  | 0.73660600  | 0.00000400  |
| C | 1.40970200  | 1.20979100  | 0.00006900  |
| C | -0.17136000 | -0.67400800 | 0.00002300  |
| C | -1.07469100 | 1.58689700  | -0.00019500 |
| C | -1.43958900 | -1.18533300 | -0.00006800 |
| C | -2.56129000 | -0.31558400 | -0.00012900 |
| C | 2.42615400  | 0.23799600  | 0.00022900  |
| C | -2.35163700 | 1.08353800  | -0.00025900 |
| C | 1.70923600  | 2.66260700  | -0.00012800 |
| C | 2.19253900  | -1.15304100 | 0.00051300  |
| H | -0.92497300 | 2.66094200  | -0.00029000 |
| H | -1.58138300 | -2.26138800 | -0.00002100 |
| H | 3.47021700  | 0.53737600  | 0.00014200  |
| H | -3.20952800 | 1.74875400  | -0.00042700 |
| H | 1.28716700  | 3.17137200  | 0.87961200  |



|   |             |             |             |
|---|-------------|-------------|-------------|
| H | 1.28734100  | 3.17110500  | -0.88010700 |
| H | 2.78745500  | 2.83934200  | -0.00005100 |
| H | -3.95740800 | -1.83112800 | 0.00061600  |
| H | -4.62119000 | -0.23774500 | 0.00066300  |

**\* ES of F1 at M06-2X/6-311++G(d,p)**

|   |             |             |             |
|---|-------------|-------------|-------------|
| O | 0.84972200  | -1.58147600 | 0.00012400  |
| O | 3.01417300  | -2.06375500 | 0.00001500  |
| N | -3.80413700 | -0.83298400 | -0.00020500 |
| C | 0.07459300  | 0.73991500  | -0.00002200 |
| C | 1.40086300  | 1.21353100  | 0.00006900  |
| C | -0.17217600 | -0.68457400 | -0.00000700 |
| C | -1.08160600 | 1.59307700  | -0.00023600 |
| C | -1.43605600 | -1.19703900 | -0.00007200 |
| C | -2.56224600 | -0.32287100 | -0.00010000 |
| C | 2.43194800  | 0.24103400  | 0.00025200  |
| C | -2.35299000 | 1.08613500  | -0.00027100 |
| C | 1.70351900  | 2.67789300  | -0.00010800 |
| C | 2.19455400  | -1.15081300 | 0.00051400  |
| H | -0.93311500 | 2.66513100  | -0.00036500 |
| H | -1.57763800 | -2.27083900 | -0.00001300 |
| H | 3.47257900  | 0.54110500  | 0.00019100  |
| H | -3.21176000 | 1.74705900  | -0.00044000 |
| H | 1.28178500  | 3.17570500  | 0.88048200  |
| H | 1.28203100  | 3.17545700  | -0.88095700 |
| H | 2.78008600  | 2.84671700  | 0.00001600  |
| H | -3.96108800 | -1.83029800 | 0.00062000  |
| H | -4.61751600 | -0.23503200 | 0.00067100  |

**\* ES of F1 at PBE/6-311++G(d,p)**

|   |             |             |             |
|---|-------------|-------------|-------------|
| O | 0.82862900  | -1.59143400 | -0.00007600 |
| O | 3.03877400  | -2.10344400 | 0.00053200  |
| N | -3.84782500 | -0.83782400 | -0.00008700 |
| C | 0.06114300  | 0.73192800  | -0.00006600 |
| C | 1.45897300  | 1.21919300  | -0.00006000 |
| C | -0.16931500 | -0.66084300 | -0.00013000 |
| C | -1.07478800 | 1.58556200  | 0.00000300  |
| C | -1.47404600 | -1.17956100 | -0.00015200 |
| C | -2.59184400 | -0.29717100 | -0.00006100 |
| C | 2.45075500  | 0.23852600  | 0.00020800  |

|   |             |             |             |
|---|-------------|-------------|-------------|
| C | -2.38301500 | 1.10154900  | -0.00000800 |
| C | 1.74552700  | 2.68171600  | -0.00040700 |
| C | 2.22121300  | -1.16411100 | 0.00035800  |
| H | -0.91532600 | 2.66544200  | 0.00005400  |
| H | -1.61856400 | -2.26162200 | -0.00016300 |
| H | 3.50467200  | 0.53078300  | 0.00033600  |
| H | -3.23365000 | 1.78484300  | 0.00005200  |
| H | 1.31466600  | 3.19400400  | 0.88335500  |
| H | 1.31467700  | 3.19353500  | -0.88445400 |
| H | 2.82874200  | 2.86952000  | -0.00045300 |
| H | -3.99016700 | -1.84516000 | 0.00004500  |
| H | -4.67711300 | -0.24828000 | 0.00008400  |

**\* ES of F1 at PW6B95D3/6-311++G(d,p)**

|   |             |             |             |
|---|-------------|-------------|-------------|
| O | 0.84312500  | -1.57423200 | 0.00016200  |
| O | 3.00831900  | -2.06486000 | 0.00004600  |
| N | -3.79954100 | -0.83117400 | -0.00024900 |
| C | 0.07003500  | 0.73424500  | -0.00002000 |
| C | 1.40970300  | 1.20933700  | 0.00005400  |
| C | -0.17127100 | -0.67229800 | 0.00001300  |
| C | -1.07326600 | 1.58300700  | -0.00022100 |
| C | -1.43808500 | -1.18468800 | -0.00005700 |
| C | -2.55825900 | -0.31559600 | -0.00011100 |
| C | 2.42337200  | 0.23795200  | 0.00022400  |
| C | -2.34966800 | 1.08267500  | -0.00027100 |
| C | 1.70633400  | 2.66486700  | -0.00011000 |
| C | 2.18831300  | -1.14889300 | 0.00048000  |
| H | -0.92256800 | 2.65103600  | -0.00033300 |
| H | -1.57836200 | -2.25482500 | 0.00000800  |
| H | 3.46159000  | 0.53506900  | 0.00015700  |
| H | -3.20059000 | 1.74728200  | -0.00044100 |
| H | 1.28370900  | 3.16635000  | 0.87602400  |
| H | 1.28395200  | 3.16611800  | -0.87649600 |
| H | 2.77879500  | 2.84017200  | 0.00001100  |
| H | -3.95260300 | -1.82463900 | 0.00061600  |
| H | -4.61192500 | -0.23925400 | 0.00065600  |

**\* ES of F1 at WB97XD/6-311++G(d,p)**

|   |            |             |            |
|---|------------|-------------|------------|
| O | 0.84623000 | -1.57965800 | 0.00014200 |
| O | 3.00931500 | -2.06923500 | 0.00004700 |

|   |             |             |             |
|---|-------------|-------------|-------------|
| N | -3.80587200 | -0.83090100 | -0.00030700 |
| C | 0.07650800  | 0.74219000  | -0.00001300 |
| C | 1.40118600  | 1.21231200  | 0.00007600  |
| C | -0.17291300 | -0.68140200 | -0.00000100 |
| C | -1.08148900 | 1.59401000  | -0.00022400 |
| C | -1.43695100 | -1.19214500 | -0.00007200 |
| C | -2.56217900 | -0.32049300 | -0.00011900 |
| C | 2.43006900  | 0.23568500  | 0.00025500  |
| C | -2.35109400 | 1.08632800  | -0.00027200 |
| C | 1.71386000  | 2.67423200  | -0.00010000 |
| C | 2.19005300  | -1.15300500 | 0.00051000  |
| H | -0.93599400 | 2.66658100  | -0.00033800 |
| H | -1.57850400 | -2.26613400 | -0.00001700 |
| H | 3.47104100  | 0.53632200  | 0.00019400  |
| H | -3.20759800 | 1.75073600  | -0.00044300 |
| H | 1.29667800  | 3.17728800  | 0.88070600  |
| H | 1.29691100  | 3.17704000  | -0.88115800 |
| H | 2.79203900  | 2.83937500  | 0.00001600  |
| H | -3.96273300 | -1.82620800 | 0.00069700  |
| H | -4.61739500 | -0.23382400 | 0.00073500  |

**S3-F2. The coordinates of the optimized structures for the GS and ES of F2 compound**

**\* GS of F2 at PBE0/6-311++G(d,p)**

|   |             |             |             |
|---|-------------|-------------|-------------|
| O | -0.82611300 | 1.37124200  | 0.23040300  |
| O | -2.87135900 | 2.14966200  | 0.37046700  |
| O | -4.42462600 | -1.73208600 | -0.26452500 |
| N | 3.74005900  | 0.09762100  | -0.00284100 |
| N | -4.96497100 | 0.43019600  | 0.10427700  |
| N | -6.34148800 | 0.21939900  | 0.07589300  |
| C | 2.42690300  | -0.22778600 | -0.05506300 |
| C | 4.79355900  | -0.87386900 | -0.27131300 |
| C | 4.18535800  | 1.44590700  | 0.32468100  |
| C | 1.42165400  | 0.75115700  | 0.11504700  |
| C | -0.32586800 | -0.93719700 | -0.15785900 |
| C | 0.09557900  | 0.38599200  | 0.06364700  |
| C | 2.00937500  | -1.57587100 | -0.28097000 |
| C | 0.68307500  | -1.90795100 | -0.32925400 |
| C | 5.22723400  | -1.65179600 | 0.96338000  |
| C | 4.28633400  | 2.36028800  | -0.88872500 |
| C | -1.70762600 | -1.18987500 | -0.19085600 |

|   |             |             |             |
|---|-------------|-------------|-------------|
| C | -2.63351700 | -0.19359300 | -0.01854200 |
| C | -2.18142400 | 1.16017800  | 0.20296200  |
| C | -4.07411000 | -0.56838000 | -0.07095700 |
| H | 4.47219400  | -1.54960100 | -1.06721800 |
| H | 5.64228000  | -0.31757000 | -0.67825000 |
| H | 3.52235600  | 1.87193600  | 1.08194400  |
| H | 5.16405000  | 1.35212700  | 0.80291000  |
| H | 1.65716300  | 1.79514000  | 0.26798200  |
| H | 2.74551800  | -2.35908900 | -0.39900300 |
| H | 0.39321600  | -2.94073500 | -0.49517900 |
| H | 5.59002300  | -0.97592000 | 1.74277800  |
| H | 4.40081100  | -2.23525600 | 1.37743600  |
| H | 6.03759900  | -2.33989400 | 0.70741200  |
| H | 4.98650100  | 1.95486700  | -1.62444400 |
| H | 3.31614100  | 2.48591900  | -1.37617800 |
| H | 4.64691600  | 3.34694600  | -0.58531600 |
| H | -2.07238200 | -2.19941000 | -0.35719300 |
| H | -4.63265500 | 1.37445400  | 0.25686200  |
| H | -6.58657500 | -0.20556600 | -0.81459000 |
| H | -6.58073300 | -0.46261800 | 0.79091200  |

**\* GS of F2 at APFD/6-311++G(d,p)**

|   |             |             |             |
|---|-------------|-------------|-------------|
| O | -0.82189300 | 1.37808800  | 0.23283300  |
| O | -2.87787800 | 2.14858100  | 0.37207100  |
| O | -4.42361300 | -1.73491900 | -0.26663100 |
| N | 3.74128800  | 0.09786600  | -0.00290200 |
| N | -4.96324500 | 0.43103000  | 0.10481000  |
| N | -6.34053900 | 0.21750800  | 0.07591900  |
| C | 2.42876300  | -0.22763100 | -0.05501900 |
| C | 4.79507700  | -0.87289700 | -0.27273500 |
| C | 4.18634600  | 1.44604200  | 0.32564500  |
| C | 1.42409000  | 0.75315900  | 0.11640500  |
| C | -0.32327900 | -0.93663400 | -0.15797800 |
| C | 0.09813700  | 0.38905900  | 0.06483900  |
| C | 2.01199900  | -1.57680700 | -0.28202200 |
| C | 0.68480500  | -1.90864300 | -0.33025200 |
| C | 5.21966200  | -1.64771300 | 0.96983900  |
| C | 4.27771300  | 2.35415000  | -0.89606400 |
| C | -1.70433200 | -1.19079000 | -0.19159200 |
| C | -2.63295800 | -0.19562500 | -0.01899000 |

|   |             |             |             |
|---|-------------|-------------|-------------|
| C | -2.18240400 | 1.16130600  | 0.20411500  |
| C | -4.07246000 | -0.56993500 | -0.07184400 |
| H | 4.47155200  | -1.54787600 | -1.06832000 |
| H | 5.64367400  | -0.31771100 | -0.68125400 |
| H | 3.52319100  | 1.86939200  | 1.08420800  |
| H | 5.16546800  | 1.35397700  | 0.80311000  |
| H | 1.66185200  | 1.79657300  | 0.27118300  |
| H | 2.74967700  | -2.35883300 | -0.40136700 |
| H | 0.39232900  | -2.94101000 | -0.49681700 |
| H | 5.58226500  | -0.96845900 | 1.74660200  |
| H | 4.38527100  | -2.21979500 | 1.38415900  |
| H | 6.02581100  | -2.34542000 | 0.72622300  |
| H | 4.97825800  | 1.94689600  | -1.63063900 |
| H | 3.30489300  | 2.46477200  | -1.38222200 |
| H | 4.63006500  | 3.34785700  | -0.60574100 |
| H | -2.06556700 | -2.20167600 | -0.35885200 |
| H | -4.63168400 | 1.37571000  | 0.25840800  |
| H | -6.58281500 | -0.20808600 | -0.81529400 |
| H | -6.57663800 | -0.46738400 | 0.78955900  |

**\* GS of F2 at B3LYP/6-311++G(d,p)**

|   |             |             |             |
|---|-------------|-------------|-------------|
| O | -0.83065300 | 1.38095700  | 0.23564600  |
| O | -2.88896900 | 2.15918200  | 0.37726700  |
| O | -4.44364900 | -1.73889100 | -0.26975500 |
| N | 3.75681600  | 0.09516700  | -0.00328300 |
| N | -4.99408300 | 0.42849000  | 0.10453200  |
| N | -6.38393100 | 0.21489100  | 0.07468000  |
| C | 2.43594400  | -0.22934900 | -0.05549500 |
| C | 4.81843800  | -0.88612300 | -0.26985900 |
| C | 4.21137900  | 1.45374400  | 0.32288800  |
| C | 1.42717800  | 0.75281300  | 0.11683600  |
| C | -0.32953700 | -0.93610100 | -0.15907000 |
| C | 0.09812500  | 0.38915100  | 0.06527900  |
| C | 2.01161700  | -1.58018200 | -0.28415900 |
| C | 0.68180600  | -1.91060000 | -0.33307500 |
| C | 5.26063600  | -1.66415400 | 0.97280500  |
| C | 4.32745200  | 2.37113900  | -0.89816300 |
| C | -1.71428100 | -1.18830400 | -0.19274000 |
| C | -2.64721800 | -0.19227300 | -0.01840400 |
| C | -2.19802000 | 1.16590300  | 0.20750000  |

|   |             |             |             |
|---|-------------|-------------|-------------|
| C | -4.09384300 | -0.57049100 | -0.07319300 |
| H | 4.49456300  | -1.56601600 | -1.05889500 |
| H | 5.66562900  | -0.33273500 | -0.67986500 |
| H | 3.54614400  | 1.88654900  | 1.07184500  |
| H | 5.18585500  | 1.35675600  | 0.80564600  |
| H | 1.66317100  | 1.79432300  | 0.27298800  |
| H | 2.74350200  | -2.36438800 | -0.40537400 |
| H | 0.39153800  | -2.94168800 | -0.50134800 |
| H | 5.62742900  | -0.98710100 | 1.74833000  |
| H | 4.43850800  | -2.24848500 | 1.39195500  |
| H | 6.07028100  | -2.35097200 | 0.71193500  |
| H | 5.03032500  | 1.96218900  | -1.62831400 |
| H | 3.36254500  | 2.50478400  | -1.39206400 |
| H | 4.69268600  | 3.35436700  | -0.58987700 |
| H | -2.07358600 | -2.19745600 | -0.36143000 |
| H | -4.67064200 | 1.37527300  | 0.26040600  |
| H | -6.62845600 | -0.20683500 | -0.81891900 |
| H | -6.62299600 | -0.46942700 | 0.78933000  |

**\* GS of F2 at BP86/6-311++G(d,p)**

|   |             |             |             |
|---|-------------|-------------|-------------|
| O | -0.83247000 | 1.39381900  | 0.23926100  |
| O | -2.91359500 | 2.16972700  | 0.38151300  |
| O | -4.46706300 | -1.75727200 | -0.27530900 |
| N | 3.77537300  | 0.09719400  | -0.00342600 |
| N | -5.00931300 | 0.43215400  | 0.10661500  |
| N | -6.40829200 | 0.23014700  | 0.07582400  |
| C | 2.44851300  | -0.22954300 | -0.05639800 |
| C | 4.84014500  | -0.88892900 | -0.26543000 |
| C | 4.22902100  | 1.46190000  | 0.31914100  |
| C | 1.43554300  | 0.75887200  | 0.11826700  |
| C | -0.33053400 | -0.94301500 | -0.16013400 |
| C | 0.09916400  | 0.39333200  | 0.06676800  |
| C | 2.02535900  | -1.58699600 | -0.28748400 |
| C | 0.68813400  | -1.92107400 | -0.33619000 |
| C | 5.27753600  | -1.66250800 | 0.98662200  |
| C | 4.34452300  | 2.37335700  | -0.91145800 |
| C | -1.71760900 | -1.19978000 | -0.19443000 |
| C | -2.66019700 | -0.19654800 | -0.01843800 |
| C | -2.21817000 | 1.16551200  | 0.20874400  |
| C | -4.10975900 | -0.57980800 | -0.07416500 |

|   |             |             |             |
|---|-------------|-------------|-------------|
| H | 4.51178300  | -1.57570400 | -1.05976300 |
| H | 5.69356100  | -0.33087600 | -0.68109200 |
| H | 3.55434900  | 1.89773900  | 1.07176900  |
| H | 5.21008200  | 1.36482800  | 0.80962800  |
| H | 1.67569100  | 1.80920000  | 0.27589000  |
| H | 2.76620800  | -2.37589000 | -0.41050700 |
| H | 0.39553200  | -2.96060400 | -0.50636500 |
| H | 5.64445900  | -0.97702000 | 1.76651000  |
| H | 4.44628500  | -2.24847400 | 1.40773700  |
| H | 6.09386300  | -2.35660700 | 0.73151200  |
| H | 5.05450900  | 1.95845700  | -1.64395000 |
| H | 3.37193700  | 2.50195400  | -1.41046100 |
| H | 4.70972000  | 3.36712700  | -0.60788200 |
| H | -2.08257800 | -2.21709300 | -0.36481000 |
| H | -4.66701900 | 1.38522400  | 0.26327000  |
| H | -6.64452300 | -0.20898900 | -0.82318000 |
| H | -6.64323800 | -0.46855900 | 0.79238400  |

**\* GS of F2 at CAM-B3LYP/6-311++G(d,p)**

|   |             |             |             |
|---|-------------|-------------|-------------|
| O | -0.82621500 | 1.37302900  | 0.23125100  |
| O | -2.87248600 | 2.14798600  | 0.37049200  |
| O | -4.42560400 | -1.72855700 | -0.26465500 |
| N | 3.74219100  | 0.09635400  | -0.00289700 |
| N | -4.97007200 | 0.42937800  | 0.10350300  |
| N | -6.35067700 | 0.20889800  | 0.07362100  |
| C | 2.42644600  | -0.22739900 | -0.05429300 |
| C | 4.79744900  | -0.87828900 | -0.27551500 |
| C | 4.19108000  | 1.44719900  | 0.32746200  |
| C | 1.42361500  | 0.75011900  | 0.11497100  |
| C | -0.32426600 | -0.93220500 | -0.15687000 |
| C | 0.09881400  | 0.38437400  | 0.06355600  |
| C | 2.00635700  | -1.57421000 | -0.27909400 |
| C | 0.68174900  | -1.90356600 | -0.32769200 |
| C | 5.23163500  | -1.66145700 | 0.95824400  |
| C | 4.28952600  | 2.36585900  | -0.88553300 |
| C | -1.71007400 | -1.18421800 | -0.18997300 |
| C | -2.63200800 | -0.19383400 | -0.01839600 |
| C | -2.17958400 | 1.16301400  | 0.20461100  |
| C | -4.07668500 | -0.56577000 | -0.07111700 |
| H | 4.47584800  | -1.55113800 | -1.07049800 |

|   |             |             |             |
|---|-------------|-------------|-------------|
| H | 5.64589500  | -0.32381400 | -0.67943700 |
| H | 3.53202600  | 1.87239500  | 1.08522100  |
| H | 5.16970200  | 1.35279200  | 0.80052100  |
| H | 1.65744300  | 1.79209300  | 0.26782700  |
| H | 2.73936200  | -2.35716600 | -0.39682800 |
| H | 0.39117300  | -2.93445900 | -0.49343300 |
| H | 5.59527900  | -0.98834700 | 1.73737700  |
| H | 4.40574400  | -2.24330700 | 1.37108600  |
| H | 6.03950100  | -2.34964100 | 0.70070200  |
| H | 4.98651100  | 1.96142200  | -1.62242800 |
| H | 3.31969900  | 2.49253100  | -1.36956800 |
| H | 4.65084400  | 3.35056600  | -0.58180200 |
| H | -2.07137700 | -2.19271800 | -0.35657900 |
| H | -4.64630100 | 1.37530500  | 0.25770300  |
| H | -6.59896800 | -0.20746100 | -0.81930100 |
| H | -6.59234200 | -0.46883100 | 0.79097700  |

**\* GS of F2 at M06/6-311++G(d,p)**

|   |             |             |             |
|---|-------------|-------------|-------------|
| O | -0.82456500 | 1.37486100  | 0.22741900  |
| O | -2.86827300 | 2.15597700  | 0.36883600  |
| O | -4.41741500 | -1.72702600 | -0.26345200 |
| N | 3.73920300  | 0.09309800  | -0.00303900 |
| N | -4.96964900 | 0.43026700  | 0.10640400  |
| N | -6.34556400 | 0.20095800  | 0.07804600  |
| C | 2.42300200  | -0.22946700 | -0.05623300 |
| C | 4.79382800  | -0.87999800 | -0.27031300 |
| C | 4.18995400  | 1.44087900  | 0.32673600  |
| C | 1.42254300  | 0.75071500  | 0.11278500  |
| C | -0.32602500 | -0.92968800 | -0.15930200 |
| C | 0.09673300  | 0.39026200  | 0.06139100  |
| C | 2.00329000  | -1.57443200 | -0.28204900 |
| C | 0.67798300  | -1.90218300 | -0.33049000 |
| C | 5.21804000  | -1.64025300 | 0.97190800  |
| C | 4.29848200  | 2.33718300  | -0.89260100 |
| C | -1.70724000 | -1.18004200 | -0.19118000 |
| C | -2.63214900 | -0.18660100 | -0.01907400 |
| C | -2.18257800 | 1.16861800  | 0.20126800  |
| C | -4.07079800 | -0.56624000 | -0.07025200 |
| H | 4.47297200  | -1.56142400 | -1.06352100 |
| H | 5.64335300  | -0.32583300 | -0.68426400 |



|   |             |             |             |
|---|-------------|-------------|-------------|
| H | 3.52488100  | 1.87369800  | 1.08038800  |
| H | 5.16619600  | 1.34420700  | 0.81426600  |
| H | 1.65946600  | 1.79566500  | 0.26723200  |
| H | 2.73911100  | -2.35921000 | -0.40153400 |
| H | 0.38128700  | -2.93402200 | -0.49667200 |
| H | 5.57327100  | -0.95170800 | 1.74541300  |
| H | 4.38467800  | -2.21396200 | 1.38929300  |
| H | 6.02953400  | -2.33566300 | 0.73966800  |
| H | 4.99849800  | 1.91617300  | -1.62151100 |
| H | 3.32905800  | 2.45503500  | -1.38650500 |
| H | 4.66061600  | 3.32960200  | -0.60989900 |
| H | -2.06954200 | -2.19208300 | -0.35715200 |
| H | -4.65090900 | 1.38077100  | 0.26026600  |
| H | -6.58465200 | -0.22590200 | -0.81535100 |
| H | -6.57411900 | -0.48863000 | 0.79204000  |

**\* GS of F2 at M06-2X/6-311++G(d,p)**

|   |             |             |             |
|---|-------------|-------------|-------------|
| O | -0.81963600 | 1.37901700  | 0.22927200  |
| O | -2.86415500 | 2.15470400  | 0.36614300  |
| O | -4.42120800 | -1.72619600 | -0.26270200 |
| N | 3.74814000  | 0.09836600  | -0.00183700 |
| N | -4.97348000 | 0.42894500  | 0.10367100  |
| N | -6.35266700 | 0.19081100  | 0.07284900  |
| C | 2.43384300  | -0.22550500 | -0.05289800 |
| C | 4.80139800  | -0.87580600 | -0.28458300 |
| C | 4.19327000  | 1.44873600  | 0.33590700  |
| C | 1.43065200  | 0.75704400  | 0.11579000  |
| C | -0.31846200 | -0.93092800 | -0.15477200 |
| C | 0.10336400  | 0.38962100  | 0.06428100  |
| C | 2.01540100  | -1.57677500 | -0.27603500 |
| C | 0.68762100  | -1.90557700 | -0.32370300 |
| C | 5.20702100  | -1.67459000 | 0.95090700  |
| C | 4.25454400  | 2.36677900  | -0.88215500 |
| C | -1.70768500 | -1.18448700 | -0.18831300 |
| C | -2.62831000 | -0.19077300 | -0.01870100 |
| C | -2.17301100 | 1.17143700  | 0.20183400  |
| C | -4.07510300 | -0.56453500 | -0.07060600 |
| H | 4.48205300  | -1.53303500 | -1.09421600 |
| H | 5.65703200  | -0.31590900 | -0.66691700 |
| H | 3.54360800  | 1.86057100  | 1.10987300  |

|   |             |             |             |
|---|-------------|-------------|-------------|
| H | 5.18353600  | 1.35563500  | 0.78573900  |
| H | 1.66336500  | 1.80087400  | 0.26579400  |
| H | 2.74946300  | -2.36056800 | -0.39039300 |
| H | 0.39360900  | -2.93652000 | -0.48653700 |
| H | 5.56726600  | -1.00535100 | 1.73502100  |
| H | 4.36094600  | -2.23955700 | 1.34680200  |
| H | 6.00631900  | -2.37528400 | 0.70285900  |
| H | 4.94623700  | 1.96514500  | -1.62562000 |
| H | 3.27252500  | 2.46627100  | -1.34833400 |
| H | 4.60164900  | 3.35951300  | -0.59018900 |
| H | -2.06769000 | -2.19503800 | -0.35317800 |
| H | -4.66643600 | 1.37947000  | 0.25727500  |
| H | -6.58188700 | -0.24014200 | -0.81982100 |
| H | -6.57280600 | -0.50095900 | 0.78564700  |

**\* GS of F2 at PBE/6-311++G(d,p)**

|   |             |             |             |
|---|-------------|-------------|-------------|
| O | -0.83092200 | 1.39218000  | 0.23491200  |
| O | -2.90798500 | 2.16979100  | 0.37515800  |
| O | -4.46067700 | -1.75532800 | -0.27002900 |
| N | 3.77007700  | 0.09661700  | -0.00338100 |
| N | -5.00392300 | 0.43160300  | 0.10524500  |
| N | -6.39752500 | 0.22722500  | 0.07545000  |
| C | 2.44517400  | -0.22967200 | -0.05608000 |
| C | 4.83205800  | -0.88541800 | -0.26970200 |
| C | 4.22262600  | 1.45647300  | 0.32319400  |
| C | 1.43358600  | 0.75780400  | 0.11610700  |
| C | -0.33051000 | -0.94206800 | -0.15827100 |
| C | 0.09823400  | 0.39322400  | 0.06545200  |
| C | 2.02247400  | -1.58576400 | -0.28406500 |
| C | 0.68657100  | -1.91927300 | -0.33196000 |
| C | 5.27215700  | -1.66030400 | 0.97663500  |
| C | 4.33730000  | 2.37079900  | -0.90130200 |
| C | -1.71602500 | -1.19803400 | -0.19172700 |
| C | -2.65688800 | -0.19499600 | -0.01816900 |
| C | -2.21370200 | 1.16565900  | 0.20512600  |
| C | -4.10405600 | -0.57830100 | -0.07261700 |
| H | 4.50339900  | -1.57026500 | -1.06494800 |
| H | 5.68420500  | -0.32662800 | -0.68598800 |
| H | 3.54924700  | 1.88979300  | 1.07779400  |
| H | 5.20358500  | 1.35839700  | 0.81283000  |

|   |             |             |             |
|---|-------------|-------------|-------------|
| H | 1.67325000  | 1.80844200  | 0.27017900  |
| H | 2.76263800  | -2.37520700 | -0.40421900 |
| H | 0.39356900  | -2.95865700 | -0.49935200 |
| H | 5.63893300  | -0.97668400 | 1.75740400  |
| H | 4.44310200  | -2.24840600 | 1.39752600  |
| H | 6.08876500  | -2.35181500 | 0.71877500  |
| H | 5.04528900  | 1.95795600  | -1.63600100 |
| H | 3.36480600  | 2.50234000  | -1.39840200 |
| H | 4.70398000  | 3.36233400  | -0.59504300 |
| H | -2.08135700 | -2.21527000 | -0.35959000 |
| H | -4.66404200 | 1.38462500  | 0.25926900  |
| H | -6.63456500 | -0.21446100 | -0.82103400 |
| H | -6.63253900 | -0.46850900 | 0.79355900  |

**\* GS of F2 at PW6B95D3/6-311++G(d,p)**

|   |             |             |             |
|---|-------------|-------------|-------------|
| O | -0.81911300 | 1.37495500  | 0.23067300  |
| O | -2.86207600 | 2.15402300  | 0.36835100  |
| O | -4.40346100 | -1.72867000 | -0.26179400 |
| N | 3.73647400  | 0.09768500  | -0.00273300 |
| N | -4.95828000 | 0.42447200  | 0.10175300  |
| N | -6.33408500 | 0.19197600  | 0.06895700  |
| C | 2.42528800  | -0.22561500 | -0.05360900 |
| C | 4.78752500  | -0.87306500 | -0.27975200 |
| C | 4.18159600  | 1.44390500  | 0.33040100  |
| C | 1.42492000  | 0.75324000  | 0.11588700  |
| C | -0.32000000 | -0.92939000 | -0.15444500 |
| C | 0.10232400  | 0.38952500  | 0.06517400  |
| C | 2.00815300  | -1.57076800 | -0.27705800 |
| C | 0.68479000  | -1.90013500 | -0.32438400 |
| C | 5.19585500  | -1.66785300 | 0.95017500  |
| C | 4.24692600  | 2.36024600  | -0.88128700 |
| C | -1.69927400 | -1.17946100 | -0.18731300 |
| C | -2.62289400 | -0.18592600 | -0.01699500 |
| C | -2.17416000 | 1.16594600  | 0.20283900  |
| C | -4.05901300 | -0.56446500 | -0.06989500 |
| H | 4.47032100  | -1.53114500 | -1.08527300 |
| H | 5.63898500  | -0.31500300 | -0.66450400 |
| H | 3.53329700  | 1.85694700  | 1.10039000  |
| H | 5.16700300  | 1.35004900  | 0.78258600  |
| H | 1.66048000  | 1.79239700  | 0.26642200  |

|   |             |             |             |
|---|-------------|-------------|-------------|
| H | 2.74044600  | -2.35101000 | -0.39282800 |
| H | 0.39369400  | -2.92768500 | -0.48763500 |
| H | 5.55306800  | -1.00311600 | 1.73500800  |
| H | 4.35649000  | -2.23761100 | 1.34461400  |
| H | 5.99603200  | -2.36259700 | 0.70177300  |
| H | 4.93356500  | 1.96122400  | -1.62609600 |
| H | 3.26829700  | 2.46754300  | -1.34536100 |
| H | 4.59791800  | 3.34795900  | -0.58847900 |
| H | -2.06267400 | -2.18430400 | -0.35195000 |
| H | -4.64655900 | 1.37071300  | 0.25251900  |
| H | -6.56346100 | -0.24311000 | -0.81728800 |
| H | -6.56068500 | -0.48974600 | 0.78399300  |

**\* GS of F2 at WB97XD/6-311++G(d,p)**

|   |             |             |             |
|---|-------------|-------------|-------------|
| O | -0.82266300 | 1.37317300  | 0.22886300  |
| O | -2.86574400 | 2.15054800  | 0.36573900  |
| O | -4.42632600 | -1.73239600 | -0.26012300 |
| N | 3.74509300  | 0.09827400  | -0.00267700 |
| N | -4.97091100 | 0.42873700  | 0.10123900  |
| N | -6.35229600 | 0.21411200  | 0.07139400  |
| C | 2.42937700  | -0.22684200 | -0.05315500 |
| C | 4.79924900  | -0.87268300 | -0.28349000 |
| C | 4.19128300  | 1.44679400  | 0.33322100  |
| C | 1.42612300  | 0.75206600  | 0.11485600  |
| C | -0.32174600 | -0.93403800 | -0.15377900 |
| C | 0.09895400  | 0.38493500  | 0.06397000  |
| C | 2.01081500  | -1.57606100 | -0.27525100 |
| C | 0.68461800  | -1.90670900 | -0.32267400 |
| C | 5.22602400  | -1.66460700 | 0.94859000  |
| C | 4.27017300  | 2.36970500  | -0.87940100 |
| C | -1.70923000 | -1.18842400 | -0.18674400 |
| C | -2.63063500 | -0.19560600 | -0.01767400 |
| C | -2.17477000 | 1.16387300  | 0.20189000  |
| C | -4.07811900 | -0.56936700 | -0.07000700 |
| H | 4.47969400  | -1.53901200 | -1.08665500 |
| H | 5.65000400  | -0.31448800 | -0.68058600 |
| H | 3.53858000  | 1.86506400  | 1.10230000  |
| H | 5.17664100  | 1.35373700  | 0.79510500  |
| H | 1.65907900  | 1.79590100  | 0.26479700  |
| H | 2.74360600  | -2.36121100 | -0.39112500 |

|   |             |             |             |
|---|-------------|-------------|-------------|
| H | 0.39402600  | -2.93883000 | -0.48567200 |
| H | 5.58794100  | -0.99300700 | 1.73123800  |
| H | 4.39240400  | -2.24255700 | 1.35450000  |
| H | 6.03188700  | -2.35625100 | 0.69165300  |
| H | 4.96342600  | 1.96829100  | -1.62292300 |
| H | 3.29240200  | 2.48551500  | -1.35279500 |
| H | 4.62574500  | 3.35787800  | -0.57815200 |
| H | -2.06867400 | -2.19918800 | -0.35104300 |
| H | -4.64723100 | 1.37455400  | 0.25216200  |
| H | -6.59604000 | -0.20903900 | -0.81944300 |
| H | -6.59150800 | -0.46402300 | 0.78900000  |

**\* ES of F2 at PBE0/6-311++G(d,p)**

|   |             |             |             |
|---|-------------|-------------|-------------|
| O | 0.85271100  | 1.32265500  | -0.20131100 |
| O | 2.92780500  | 2.07444000  | -0.33474200 |
| O | 4.53614000  | -1.70724900 | 0.18557100  |
| N | -3.74692100 | 0.13508500  | -0.00606700 |
| N | 4.91928900  | 0.50130100  | -0.03102000 |
| N | 6.21462800  | 0.27197400  | -0.20671900 |
| C | -2.43525200 | -0.24150000 | 0.05656600  |
| C | -4.82554000 | -0.79910700 | 0.26942700  |
| C | -4.14359600 | 1.48913800  | -0.35423800 |
| C | -1.39329200 | 0.70823800  | -0.10448000 |
| C | 0.32486100  | -1.01775200 | 0.18322000  |
| C | -0.07641600 | 0.32359100  | -0.04254300 |
| C | -2.05397300 | -1.58782300 | 0.28440700  |
| C | -0.72721000 | -1.95191500 | 0.34492300  |
| C | -5.28096900 | -1.58305200 | -0.95601900 |
| C | -4.22556800 | 2.42798300  | 0.84403000  |
| C | 1.69281300  | -1.31450400 | 0.22422800  |
| C | 2.63256400  | -0.26242000 | 0.03995700  |
| C | 2.21529100  | 1.06371700  | -0.17012500 |
| C | 4.05012800  | -0.58892300 | 0.07209600  |
| H | -4.52276500 | -1.47708700 | 1.07189700  |
| H | -5.66253200 | -0.21788700 | 0.66764400  |
| H | -3.46070400 | 1.88548600  | -1.11059700 |
| H | -5.12213000 | 1.42437800  | -0.83917700 |
| H | -1.60236500 | 1.75850100  | -0.25914400 |
| H | -2.80657300 | -2.35744700 | 0.39602200  |
| H | -0.47033900 | -2.99338300 | 0.51319100  |

|   |             |             |             |
|---|-------------|-------------|-------------|
| H | -5.62950600 | -0.90795100 | -1.74275300 |
| H | -4.46814600 | -2.18957800 | -1.36366500 |
| H | -6.10674900 | -2.24948000 | -0.69073000 |
| H | -4.94386300 | 2.05675300  | 1.58050700  |
| H | -3.25518300 | 2.52950600  | 1.33680200  |
| H | -4.55218800 | 3.42098800  | 0.52207300  |
| H | 2.04342700  | -2.32519100 | 0.38843200  |
| H | 4.47929300  | 1.42964900  | -0.20022400 |
| H | 6.83477000  | 1.02281600  | 0.06582000  |
| H | 6.48028100  | -0.68138700 | 0.02570500  |

**\* ES of F2 at APFD/6-311++G(d,p)**

|   |             |             |             |
|---|-------------|-------------|-------------|
| O | -0.84778100 | 1.33077200  | 0.20352000  |
| O | -2.93596200 | 2.07607000  | 0.33348300  |
| O | -4.52951500 | -1.71628500 | -0.18406300 |
| N | 3.74878600  | 0.13497400  | 0.00684100  |
| N | -4.92244400 | 0.49686200  | 0.02561500  |
| N | -6.21809400 | 0.27172700  | 0.21198000  |
| C | 2.43739300  | -0.24087700 | -0.05644200 |
| C | 4.82714900  | -0.79884600 | -0.27050100 |
| C | 4.14571300  | 1.48833000  | 0.35727600  |
| C | 1.39668100  | 0.71117800  | 0.10597400  |
| C | -0.32167900 | -1.01534200 | -0.18486000 |
| C | 0.07947400  | 0.32808900  | 0.04319100  |
| C | 2.05653100  | -1.58774000 | -0.28623600 |
| C | 0.72848800  | -1.95122300 | -0.34777200 |
| C | 5.27281700  | -1.58165300 | 0.96204900  |
| C | 4.22049700  | 2.42153600  | -0.84870400 |
| C | -1.68972500 | -1.31172800 | -0.22611200 |
| C | -2.63026900 | -0.26092200 | -0.04165900 |
| C | -2.21631500 | 1.06663700  | 0.16965000  |
| C | -4.04933200 | -0.59446100 | -0.07405500 |
| H | 4.52221000  | -1.47510400 | -1.07358000 |
| H | 5.66457600  | -0.21888100 | -0.66950300 |
| H | 3.46204800  | 1.88201500  | 1.11429200  |
| H | 5.12390200  | 1.42445800  | 0.84288600  |
| H | 1.60859500  | 1.76072900  | 0.26300700  |
| H | 2.81047300  | -2.35632400 | -0.39923300 |
| H | 0.46862600  | -2.99215700 | -0.51751300 |
| H | 5.62181000  | -0.90419600 | 1.74680000  |

|   |             |             |             |
|---|-------------|-------------|-------------|
| H | 4.45126900  | -2.17653100 | 1.36974900  |
| H | 6.09397300  | -2.25860700 | 0.70853100  |
| H | 4.93983600  | 2.04841000  | -1.58345900 |
| H | 3.24865900  | 2.50886400  | -1.34164200 |
| H | 4.53907800  | 3.42125900  | -0.53908500 |
| H | -2.03951200 | -2.32293600 | -0.39105000 |
| H | -4.47974400 | 1.42583100  | 0.19435000  |
| H | -6.83725200 | 1.02549200  | -0.05502400 |
| H | -6.49476700 | -0.67959900 | -0.01488300 |

**\* ES of F2 at B3LYP/6-311++G(d,p)**

|   |             |             |             |
|---|-------------|-------------|-------------|
| O | -0.85503300 | 1.33699500  | 0.20572400  |
| O | -2.94670300 | 2.09095300  | 0.33554800  |
| O | -4.54630500 | -1.71519200 | -0.18573600 |
| N | 3.76612800  | 0.13044300  | 0.00663300  |
| N | -4.96186200 | 0.49760500  | 0.01815100  |
| N | -6.26280500 | 0.25066800  | 0.21961600  |
| C | 2.44480300  | -0.24263400 | -0.05790800 |
| C | 4.85104800  | -0.81514900 | -0.26684900 |
| C | 4.17365900  | 1.49331300  | 0.35653000  |
| C | 1.40160100  | 0.71237900  | 0.10556400  |
| C | -0.32746900 | -1.01175300 | -0.18726400 |
| C | 0.08072500  | 0.33105300  | 0.04279800  |
| C | 2.05558600  | -1.59078300 | -0.29016700 |
| C | 0.72469000  | -1.95169300 | -0.35258100 |
| C | 5.31103700  | -1.60313600 | 0.96557900  |
| C | 4.27236800  | 2.43865600  | -0.84691000 |
| C | -1.69890700 | -1.30584600 | -0.22805600 |
| C | -2.64623800 | -0.25375900 | -0.04106100 |
| C | -2.23322800 | 1.07550400  | 0.17125200  |
| C | -4.06834400 | -0.59035500 | -0.07588900 |
| H | 4.54655500  | -1.49502200 | -1.06486800 |
| H | 5.68901200  | -0.23826500 | -0.66528700 |
| H | 3.48880200  | 1.89603100  | 1.10534800  |
| H | 5.14778900  | 1.42303600  | 0.84630500  |
| H | 1.61350200  | 1.75959100  | 0.26412600  |
| H | 2.80307800  | -2.36234200 | -0.40507500 |
| H | 0.46575100  | -2.99095200 | -0.52430000 |
| H | 5.66276100  | -0.92921100 | 1.75099900  |
| H | 4.50079600  | -2.21030400 | 1.37522800  |

|   |             |             |             |
|---|-------------|-------------|-------------|
| H | 6.13567900  | -2.26892100 | 0.69579700  |
| H | 4.99202000  | 2.06389600  | -1.57930700 |
| H | 3.30705400  | 2.55218800  | -1.34520700 |
| H | 4.60637700  | 3.42676200  | -0.51805800 |
| H | -2.04651900 | -2.31565500 | -0.39427500 |
| H | -4.54840200 | 1.43157400  | 0.19513200  |
| H | -6.89394200 | 0.99481200  | -0.05138000 |
| H | -6.52421900 | -0.70505500 | -0.01047900 |

**\* ES of F2 at BP86/6-311++G(d,p)**

|   |             |             |             |
|---|-------------|-------------|-------------|
| O | -0.85144500 | 1.35697300  | 0.19642400  |
| O | -2.98742300 | 2.09427200  | 0.30638100  |
| O | -4.57461600 | -1.73924100 | -0.14632800 |
| N | 3.78387800  | 0.12924800  | 0.01529500  |
| N | -4.97940300 | 0.49928300  | -0.00938100 |
| N | -6.28326900 | 0.26617900  | 0.29363700  |
| C | 2.45862500  | -0.24158000 | -0.06099200 |
| C | 4.87204000  | -0.82311800 | -0.25101100 |
| C | 4.19300600  | 1.49535500  | 0.37335300  |
| C | 1.41364000  | 0.72221400  | 0.10770100  |
| C | -0.32382800 | -1.00644200 | -0.21385900 |
| C | 0.08327000  | 0.34476700  | 0.03254700  |
| C | 2.06971400  | -1.59400600 | -0.31084800 |
| C | 0.73032900  | -1.95266200 | -0.38438400 |
| C | 5.31477300  | -1.61548700 | 0.98939400  |
| C | 4.30166800  | 2.44252500  | -0.83242600 |
| C | -1.70087700 | -1.30390200 | -0.25769600 |
| C | -2.64826100 | -0.26036100 | -0.06367700 |
| C | -2.24833700 | 1.07237000  | 0.14902700  |
| C | -4.09810500 | -0.59822800 | -0.08069100 |
| H | 4.56755700  | -1.50391500 | -1.06116100 |
| H | 5.72057900  | -0.24132900 | -0.64537200 |
| H | 3.49592200  | 1.89788700  | 1.12481500  |
| H | 5.17020100  | 1.41809900  | 0.87653600  |
| H | 1.63234200  | 1.77609600  | 0.27753900  |
| H | 2.82476700  | -2.37102100 | -0.42902800 |
| H | 0.46566600  | -2.99794000 | -0.56765900 |
| H | 5.66254000  | -0.93888500 | 1.78599600  |
| H | 4.48986700  | -2.22365000 | 1.39121200  |
| H | 6.14582800  | -2.29042100 | 0.72871700  |



|   |             |             |             |
|---|-------------|-------------|-------------|
| H | 5.03118600  | 2.06418900  | -1.56588500 |
| H | 3.33202400  | 2.55759200  | -1.34071500 |
| H | 4.63709100  | 3.43819400  | -0.50036400 |
| H | -2.04747400 | -2.32454500 | -0.42811000 |
| H | -4.50856800 | 1.43186400  | 0.17396600  |
| H | -6.92710600 | 0.97381300  | -0.06592600 |
| H | -6.53894100 | -0.71369300 | 0.11813200  |

**\* ES of F2 at CAM-B3LYP/6-311++G(d,p)**

|   |             |             |             |
|---|-------------|-------------|-------------|
| O | -0.82500100 | 1.38292100  | 0.20417000  |
| O | -2.87867500 | 2.14363600  | 0.36569000  |
| O | -4.43342700 | -1.71212600 | -0.25558800 |
| N | 3.73967300  | 0.10490400  | 0.00355300  |
| N | -4.97292000 | 0.45020200  | 0.12298600  |
| N | -6.35066900 | 0.21688800  | 0.10488200  |
| C | 2.43449400  | -0.24121200 | -0.05754000 |
| C | 4.81236800  | -0.85449400 | -0.25841900 |
| C | 4.17423900  | 1.46186400  | 0.33518400  |
| C | 1.40725400  | 0.73744400  | 0.10765600  |
| C | -0.33108300 | -0.96277900 | -0.17732100 |
| C | 0.09507000  | 0.37860900  | 0.04610900  |
| C | 2.02681100  | -1.59281200 | -0.28630400 |
| C | 0.70675200  | -1.93065500 | -0.33905400 |
| C | 5.23719300  | -1.62560800 | 0.98865900  |
| C | 4.28055900  | 2.36679000  | -0.88973600 |
| C | -1.70268900 | -1.24332100 | -0.22031300 |
| C | -2.63730700 | -0.19698500 | -0.02880400 |
| C | -2.19192100 | 1.14514400  | 0.18875400  |
| C | -4.06913400 | -0.54549600 | -0.06308600 |
| H | 4.50366400  | -1.53286800 | -1.05266100 |
| H | 5.65640800  | -0.28461200 | -0.64831000 |
| H | 3.50077600  | 1.88579900  | 1.07886200  |
| H | 5.14881900  | 1.37186400  | 0.81614000  |
| H | 1.63926500  | 1.77931900  | 0.26584300  |
| H | 2.76641700  | -2.37026400 | -0.40215100 |
| H | 0.42379200  | -2.96287400 | -0.50381700 |
| H | 5.58452200  | -0.94641900 | 1.76901300  |
| H | 4.41295000  | -2.21698600 | 1.38947100  |
| H | 6.05611900  | -2.30178800 | 0.73656800  |
| H | 4.98384900  | 1.95799500  | -1.61717500 |

|   |             |             |             |
|---|-------------|-------------|-------------|
| H | 3.31299800  | 2.48905500  | -1.37839000 |
| H | 4.63956300  | 3.35135200  | -0.58451900 |
| H | -2.06345800 | -2.24636100 | -0.38914000 |
| H | -4.65358000 | 1.39728800  | 0.27427600  |
| H | -6.60323100 | -0.20354200 | -0.78531800 |
| H | -6.58027400 | -0.46530600 | 0.82246700  |

**\* ES of F2 at M06/6-311++G(d,p)**

|   |             |             |             |
|---|-------------|-------------|-------------|
| O | -0.84685600 | 1.33608200  | 0.19609100  |
| O | -2.91157100 | 2.10007700  | 0.33887800  |
| O | -4.51156700 | -1.70354100 | -0.17964700 |
| N | 3.74634200  | 0.12467900  | 0.00583700  |
| N | -4.94328500 | 0.49595000  | 0.02771700  |
| N | -6.23554500 | 0.21900900  | 0.20095400  |
| C | 2.43064000  | -0.24352800 | -0.05733800 |
| C | 4.82277800  | -0.81376600 | -0.27257700 |
| C | 4.15447100  | 1.47600400  | 0.35827200  |
| C | 1.39651900  | 0.71203600  | 0.10209000  |
| C | -0.32865100 | -1.00157200 | -0.18250400 |
| C | 0.07934300  | 0.33645400  | 0.04069300  |
| C | 2.04214800  | -1.58672600 | -0.28418300 |
| C | 0.71638100  | -1.94262800 | -0.34394600 |
| C | 5.27132700  | -1.58095800 | 0.95914100  |
| C | 4.25281500  | 2.39640100  | -0.84599800 |
| C | -1.69403800 | -1.29141800 | -0.22200600 |
| C | -2.63606800 | -0.23850900 | -0.03668500 |
| C | -2.21546700 | 1.09157800  | 0.17193100  |
| C | -4.04253300 | -0.58097400 | -0.06812500 |
| H | 4.51593500  | -1.49667600 | -1.07119800 |
| H | 5.66053800  | -0.23631400 | -0.68068500 |
| H | 3.46878100  | 1.88208100  | 1.10895800  |
| H | 5.12895800  | 1.40277000  | 0.85505100  |
| H | 1.61125700  | 1.76281700  | 0.25640400  |
| H | 2.79246400  | -2.36005900 | -0.39682800 |
| H | 0.44847600  | -2.98258900 | -0.51130100 |
| H | 5.61646800  | -0.89418800 | 1.73889600  |
| H | 4.45219700  | -2.17685600 | 1.37339000  |
| H | 6.09637000  | -2.25605600 | 0.71356600  |
| H | 4.97090200  | 2.00549400  | -1.57419700 |
| H | 3.28520700  | 2.49619000  | -1.34747200 |

|   |             |             |             |
|---|-------------|-------------|-------------|
| H | 4.58630400  | 3.39332200  | -0.54320300 |
| H | -2.04393500 | -2.30356800 | -0.38636900 |
| H | -4.56383600 | 1.43921000  | 0.20359000  |
| H | -6.88179400 | 0.94001400  | -0.09966400 |
| H | -6.45490000 | -0.74836400 | -0.03565500 |

**\* ES of F2 at M06-2X/6-311++G(d,p)**

|   |             |             |             |
|---|-------------|-------------|-------------|
| O | -0.81835100 | 1.39153300  | 0.19209900  |
| O | -2.87031000 | 2.15066400  | 0.35966300  |
| O | -4.42884900 | -1.71006100 | -0.25088000 |
| N | 3.74524700  | 0.10604000  | 0.00522900  |
| N | -4.97620700 | 0.44893800  | 0.12791300  |
| N | -6.35240600 | 0.19731100  | 0.11092300  |
| C | 2.44122000  | -0.23967500 | -0.05706400 |
| C | 4.81612100  | -0.85268900 | -0.26625100 |
| C | 4.17679600  | 1.46101500  | 0.34840300  |
| C | 1.41401600  | 0.74533900  | 0.10532000  |
| C | -0.32556400 | -0.96009700 | -0.17953400 |
| C | 0.09879800  | 0.38600400  | 0.04138600  |
| C | 2.03547700  | -1.59607000 | -0.28406500 |
| C | 0.71191600  | -1.93219900 | -0.33639800 |
| C | 5.21171400  | -1.63823900 | 0.98430600  |
| C | 4.24822800  | 2.36692300  | -0.88126500 |
| C | -1.70044100 | -1.24255200 | -0.22398100 |
| C | -2.63302400 | -0.19348800 | -0.03114800 |
| C | -2.18642000 | 1.15380400  | 0.18310600  |
| C | -4.06683100 | -0.54455200 | -0.06063500 |
| H | 4.50923000  | -1.51681700 | -1.07388700 |
| H | 5.66739400  | -0.27761300 | -0.63416600 |
| H | 3.51121200  | 1.87089200  | 1.10779900  |
| H | 5.16291800  | 1.37065800  | 0.80671700  |
| H | 1.64580500  | 1.78941300  | 0.25879800  |
| H | 2.77626600  | -2.37484200 | -0.39419400 |
| H | 0.42510200  | -2.96457700 | -0.49702200 |
| H | 5.55300100  | -0.96182100 | 1.76979900  |
| H | 4.36778300  | -2.21488100 | 1.36605900  |
| H | 6.02431500  | -2.32485600 | 0.74220000  |
| H | 4.94542900  | 1.96019800  | -1.61580700 |
| H | 3.26834200  | 2.46520800  | -1.35111900 |
| H | 4.59597100  | 3.35777500  | -0.58520300 |

|   |             |             |             |
|---|-------------|-------------|-------------|
| H | -2.06001600 | -2.24781500 | -0.39109100 |
| H | -4.67447700 | 1.40085800  | 0.27760700  |
| H | -6.58730500 | -0.23717800 | -0.77890700 |
| H | -6.55935400 | -0.49884800 | 0.82382900  |

**\* ES of F2 at PBE/6-311++G(d,p)**

|   |             |             |             |
|---|-------------|-------------|-------------|
| O | -0.84978200 | 1.35553300  | 0.19144400  |
| O | -2.98187800 | 2.09374500  | 0.30056700  |
| O | -4.56795500 | -1.73827100 | -0.14317100 |
| N | 3.77818500  | 0.12853900  | 0.01434100  |
| N | -4.97274200 | 0.49656200  | -0.00404900 |
| N | -6.27621200 | 0.26650000  | 0.28359800  |
| C | 2.45504900  | -0.24184100 | -0.06031400 |
| C | 4.86352400  | -0.81911600 | -0.25860700 |
| C | 4.18680800  | 1.48925800  | 0.37744100  |
| C | 1.41165100  | 0.72129000  | 0.10514400  |
| C | -0.32407100 | -1.00552200 | -0.20896000 |
| C | 0.08207800  | 0.34491100  | 0.03203100  |
| C | 2.06628600  | -1.59340300 | -0.30499400 |
| C | 0.72812800  | -1.95128500 | -0.37626500 |
| C | 5.31269900  | -1.61194300 | 0.97516200  |
| C | 4.29606700  | 2.43980700  | -0.82146400 |
| C | -1.69987100 | -1.30220000 | -0.25146900 |
| C | -2.64484300 | -0.25948700 | -0.06091400 |
| C | -2.24388500 | 1.07248600  | 0.14646800  |
| C | -4.09330900 | -0.59729600 | -0.07715100 |
| H | 4.55698700  | -1.49834300 | -1.06866400 |
| H | 5.70941200  | -0.23610700 | -0.65592100 |
| H | 3.49061700  | 1.88912200  | 1.13049700  |
| H | 5.16349400  | 1.41012700  | 0.88057400  |
| H | 1.63003200  | 1.77577200  | 0.26961300  |
| H | 2.82052900  | -2.37119900 | -0.41954100 |
| H | 0.46273900  | -2.99665700 | -0.55511500 |
| H | 5.66142100  | -0.93674100 | 1.77174100  |
| H | 4.49166400  | -2.22313000 | 1.37868300  |
| H | 6.14421800  | -2.28324000 | 0.70991600  |
| H | 5.02367900  | 2.06339200  | -1.55693300 |
| H | 3.32681900  | 2.55905000  | -1.32827100 |
| H | 4.63376400  | 3.43262800  | -0.48578100 |
| H | -2.04679300 | -2.32297800 | -0.41843300 |

|   |             |             |             |
|---|-------------|-------------|-------------|
| H | -4.50472700 | 1.42984600  | 0.17255900  |
| H | -6.91553700 | 0.97666800  | -0.07604500 |
| H | -6.53387900 | -0.71143200 | 0.10652200  |

**\* ES of F2 at PW6B95D3/6-311++G(d,p)**

|   |             |             |             |
|---|-------------|-------------|-------------|
| O | -0.84295000 | 1.33465800  | 0.19961400  |
| O | -2.90860900 | 2.09306600  | 0.34073800  |
| O | -4.50145600 | -1.70694900 | -0.18293000 |
| N | 3.74293500  | 0.13118200  | 0.00479000  |
| N | -4.92374600 | 0.48862400  | 0.02793000  |
| N | -6.21843400 | 0.22189200  | 0.19536300  |
| C | 2.43259800  | -0.23972600 | -0.05584500 |
| C | 4.81669000  | -0.80487600 | -0.27948300 |
| C | 4.14438600  | 1.48120100  | 0.36031800  |
| C | 1.39788900  | 0.71362300  | 0.10342500  |
| C | -0.32171600 | -1.00298700 | -0.17828200 |
| C | 0.08396700  | 0.33358800  | 0.04325900  |
| C | 2.04835500  | -1.58322700 | -0.27976100 |
| C | 0.72440400  | -1.94103600 | -0.33790800 |
| C | 5.24685200  | -1.60514400 | 0.94211600  |
| C | 4.19960800  | 2.41998500  | -0.83698700 |
| C | -1.68700300 | -1.29431600 | -0.21880100 |
| C | -2.62619700 | -0.24288900 | -0.03589500 |
| C | -2.20732700 | 1.08464700  | 0.17354500  |
| C | -4.03158400 | -0.58084200 | -0.06860400 |
| H | 4.51471800  | -1.46556800 | -1.08980600 |
| H | 5.65692300  | -0.22394000 | -0.65687600 |
| H | 3.47519700  | 1.86792300  | 1.12656200  |
| H | 5.12795800  | 1.41190600  | 0.82249800  |
| H | 1.60998700  | 1.75874700  | 0.25397000  |
| H | 2.79532000  | -2.35169600 | -0.38858700 |
| H | 0.46307800  | -2.97674600 | -0.50193900 |
| H | 5.59266000  | -0.94125500 | 1.73285600  |
| H | 4.42041400  | -2.19633000 | 1.33195200  |
| H | 6.06110100  | -2.27982400 | 0.68301600  |
| H | 4.90467300  | 2.05116400  | -1.58024700 |
| H | 3.22316500  | 2.50834300  | -1.30954900 |
| H | 4.52157300  | 3.41168700  | -0.52370300 |
| H | -2.04011500 | -2.29885000 | -0.38140100 |
| H | -4.53960700 | 1.42491500  | 0.20220800  |

|   |             |             |             |
|---|-------------|-------------|-------------|
| H | -6.84957300 | 0.94737500  | -0.10842300 |
| H | -6.44416100 | -0.73394100 | -0.05507000 |

**\* ES of F1 at WB97XD/6-311++G(d,p)**

|   |             |             |             |
|---|-------------|-------------|-------------|
| O | -0.82133800 | 1.38405900  | 0.19876100  |
| O | -2.87168500 | 2.14711100  | 0.35885800  |
| O | -4.43243000 | -1.71612700 | -0.25167200 |
| N | 3.74135400  | 0.10652600  | 0.00375400  |
| N | -4.97302600 | 0.44829500  | 0.12451900  |
| N | -6.35152500 | 0.22008900  | 0.10544500  |
| C | 2.43753400  | -0.24117900 | -0.05645200 |
| C | 4.81391200  | -0.84900400 | -0.26548300 |
| C | 4.17280400  | 1.46152500  | 0.34167300  |
| C | 1.40916900  | 0.73981300  | 0.10739700  |
| C | -0.32924600 | -0.96510100 | -0.17578600 |
| C | 0.09573900  | 0.38108000  | 0.04532100  |
| C | 2.03158900  | -1.59596100 | -0.28301400 |
| C | 0.71088900  | -1.93530300 | -0.33500400 |
| C | 5.23135300  | -1.62716500 | 0.98083000  |
| C | 4.25697600  | 2.37117900  | -0.88264000 |
| C | -1.69914200 | -1.24745500 | -0.21880500 |
| C | -2.63571500 | -0.19774200 | -0.02886300 |
| C | -2.18750100 | 1.14645000  | 0.18465000  |
| C | -4.06890500 | -0.54921400 | -0.06146200 |
| H | 4.50745200  | -1.52164300 | -1.06725800 |
| H | 5.65967300  | -0.27521400 | -0.64900800 |
| H | 3.50619900  | 1.87720800  | 1.09807200  |
| H | 5.15476500  | 1.37309900  | 0.81013900  |
| H | 1.64132500  | 1.78336600  | 0.26248600  |
| H | 2.77153400  | -2.37520500 | -0.39607300 |
| H | 0.42766300  | -2.96867400 | -0.49682100 |
| H | 5.57582400  | -0.94842600 | 1.76424600  |
| H | 4.39993700  | -2.21533900 | 1.37476100  |
| H | 6.04922700  | -2.30611100 | 0.73040900  |
| H | 4.95560000  | 1.96611900  | -1.61813200 |
| H | 3.28060400  | 2.48243500  | -1.35892100 |
| H | 4.61036000  | 3.35915300  | -0.57997800 |
| H | -2.05830100 | -2.25291800 | -0.38549500 |
| H | -4.65468800 | 1.39586600  | 0.27052400  |
| H | -6.59841900 | -0.20965400 | -0.78175800 |

|   |             |             |            |
|---|-------------|-------------|------------|
| H | -6.57950000 | -0.46033200 | 0.82502600 |
|---|-------------|-------------|------------|

**S3-F3. The coordinates of the optimized structures for the GS and ES of F3 compound**

**\* GS of F3 at PBE0/6-311++G(d,p)**

|   |             |             |             |
|---|-------------|-------------|-------------|
| O | -0.14621900 | 2.63105000  | 0.03514500  |
| O | 2.39051200  | -2.21847600 | -0.24167100 |
| O | 3.74772400  | -0.07605700 | 0.23347800  |
| O | -3.50520600 | -2.74319600 | 0.15283600  |
| O | -1.88620400 | 3.98578700  | -0.04423600 |
| O | -2.64458600 | -1.29018700 | 1.62107400  |
| C | -0.35260200 | 0.25755200  | -0.29785300 |
| C | -1.77022200 | 0.43236100  | -0.47091400 |
| C | 0.41278300  | 1.39412400  | -0.04445000 |
| C | -2.65749200 | -0.74472000 | -0.73765600 |
| C | 0.31359800  | -0.98398100 | -0.36856900 |
| C | 1.67587600  | -1.07589300 | -0.19033700 |
| C | 1.79087700  | 1.32845400  | 0.13976500  |
| C | 2.43015800  | 0.10298300  | 0.07115800  |
| C | -2.29750500 | 1.68001600  | -0.39511800 |
| C | -1.49016700 | 2.84292300  | -0.13216000 |
| C | -2.91033800 | -1.59390700 | 0.48610500  |
| C | 1.68817500  | -3.42281700 | -0.49551100 |
| C | 4.55141900  | 1.06557400  | 0.49492500  |
| H | -2.25356500 | -1.38382300 | -1.52831300 |
| H | -3.63606300 | -0.40748200 | -1.09248500 |
| H | -0.25715600 | -1.88069900 | -0.57023300 |
| H | 2.33364800  | 2.24408700  | 0.33349800  |
| H | -3.35779300 | 1.85931400  | -0.52465200 |
| H | 2.43788900  | -4.21208500 | -0.49322300 |
| H | 1.19341200  | -3.39415100 | -1.47202000 |
| H | 0.94807200  | -3.62161800 | 0.28674500  |
| H | 4.49814700  | 1.78026400  | -0.33188600 |
| H | 4.24953900  | 1.55263900  | 1.42705400  |
| H | 5.57011900  | 0.69509900  | 0.59098400  |
| H | -3.68178700 | -3.23892300 | 0.96521500  |

**\* GS of F3 at APFD/6-311++G(d,p)**

|   |             |             |             |
|---|-------------|-------------|-------------|
| O | -0.21435400 | 2.64584900  | 0.03863800  |
| O | 2.40679400  | -2.16417100 | -0.25334900 |

|   |             |             |             |
|---|-------------|-------------|-------------|
| O | 3.72474400  | -0.01332500 | 0.21818400  |
| O | -3.34474200 | -2.85145300 | 0.15820900  |
| O | -1.99262700 | 3.96396200  | -0.02327600 |
| O | -2.46675900 | -1.38828000 | 1.61770200  |
| C | -0.38250000 | 0.26553600  | -0.30387100 |
| C | -1.80336100 | 0.41527600  | -0.46465600 |
| C | 0.36485500  | 1.41608700  | -0.04848200 |
| C | -2.66279300 | -0.78365100 | -0.72218500 |
| C | 0.30144900  | -0.96481600 | -0.37914200 |
| C | 1.66712300  | -1.03535700 | -0.20253400 |
| C | 1.74398200  | 1.37320700  | 0.13179000  |
| C | 2.40328600  | 0.15529400  | 0.05931800  |
| C | -2.35849800 | 1.65038600  | -0.37655300 |
| C | -1.57019800 | 2.82997400  | -0.11753300 |
| C | -2.79178700 | -1.67841900 | 0.49274900  |
| C | 1.72818500  | -3.38580900 | -0.49966200 |
| C | 4.52126300  | 1.13446100  | 0.48435100  |
| H | -2.28259500 | -1.37889500 | -1.55832200 |
| H | -3.67573600 | -0.47922800 | -1.00241900 |
| H | -0.25770800 | -1.86905300 | -0.57980300 |
| H | 2.27179100  | 2.29765400  | 0.32693500  |
| H | -3.42400200 | 1.80855500  | -0.49134800 |
| H | 2.49465600  | -4.15844000 | -0.49410700 |
| H | 1.23164300  | -3.37297300 | -1.47564000 |
| H | 0.99385200  | -3.59540900 | 0.28525500  |
| H | 4.46189500  | 1.85236900  | -0.33925700 |
| H | 4.21695300  | 1.61457900  | 1.41930800  |
| H | 5.54223100  | 0.77019100  | 0.57730400  |
| H | -3.44346000 | -3.38300900 | 0.96170000  |

**\* GS of F3 at B3LYP/6-311++G(d,p)**

|   |             |             |             |
|---|-------------|-------------|-------------|
| O | -0.13205000 | 2.64043500  | 0.03329000  |
| O | 2.40697700  | -2.23687400 | -0.23765700 |
| O | 3.77535600  | -0.08585400 | 0.24034700  |
| O | -3.58724900 | -2.72281800 | 0.14704600  |
| O | -1.88220800 | 4.00220700  | -0.05294600 |
| O | -2.72530000 | -1.27049700 | 1.63046300  |
| C | -0.34329800 | 0.25609400  | -0.29841100 |
| C | -1.76475800 | 0.43528500  | -0.47477800 |
| C | 0.42924200  | 1.39367000  | -0.04438800 |



|   |             |             |             |
|---|-------------|-------------|-------------|
| C | -2.66435400 | -0.74285200 | -0.74523200 |
| C | 0.32476000  | -0.99000400 | -0.36715900 |
| C | 1.69017100  | -1.08451300 | -0.18696000 |
| C | 1.80985500  | 1.32574800  | 0.14191800  |
| C | 2.44961400  | 0.09615700  | 0.07522500  |
| C | -2.29245900 | 1.68694500  | -0.40212800 |
| C | -1.48707300 | 2.85445700  | -0.13880500 |
| C | -2.96875300 | -1.57641000 | 0.48800300  |
| C | 1.70896600  | -3.45796900 | -0.49535400 |
| C | 4.59960800  | 1.05696300  | 0.50419400  |
| H | -2.24833500 | -1.39983800 | -1.51283900 |
| H | -3.62640100 | -0.39812200 | -1.13367800 |
| H | -0.24589300 | -1.88440700 | -0.56787600 |
| H | 2.35259300  | 2.23974100  | 0.33476500  |
| H | -3.35130200 | 1.86553300  | -0.53490900 |
| H | 2.46813200  | -4.23698100 | -0.48947000 |
| H | 1.21874600  | -3.43217800 | -1.47283200 |
| H | 0.97000300  | -3.66102500 | 0.28507400  |
| H | 4.55331600  | 1.76992300  | -0.32287500 |
| H | 4.30278500  | 1.54477000  | 1.43609000  |
| H | 5.61154300  | 0.67041500  | 0.59887200  |
| H | -3.79852200 | -3.21206600 | 0.95856600  |

**\* GS of F3 at BP86/6-311++G(d,p)**

|   |             |             |             |
|---|-------------|-------------|-------------|
| O | -0.13927400 | 2.65697000  | 0.03221900  |
| O | 2.42857400  | -2.24058200 | -0.23831500 |
| O | 3.79330000  | -0.07948000 | 0.24366200  |
| O | -3.55167800 | -2.76941600 | 0.14826000  |
| O | -1.91561100 | 4.02201400  | -0.05657800 |
| O | -2.74412000 | -1.26879600 | 1.64772100  |
| C | -0.34896600 | 0.25384700  | -0.30259900 |
| C | -1.77147100 | 0.42658600  | -0.48014800 |
| C | 0.42615100  | 1.40491500  | -0.04565900 |
| C | -2.66569100 | -0.75988800 | -0.74808300 |
| C | 0.32615000  | -0.99635600 | -0.37088100 |
| C | 1.70069700  | -1.08704500 | -0.18824700 |
| C | 1.81352200  | 1.33972200  | 0.14300500  |
| C | 2.46026500  | 0.10334300  | 0.07660700  |
| C | -2.31216800 | 1.68713600  | -0.40668400 |
| C | -1.51906500 | 2.86352700  | -0.14393700 |

|   |             |             |             |
|---|-------------|-------------|-------------|
| C | -2.96358300 | -1.59361600 | 0.49393300  |
| C | 1.71484700  | -3.46320400 | -0.50210400 |
| C | 4.60591600  | 1.08369000  | 0.51045600  |
| H | -2.24525700 | -1.42128900 | -1.52276600 |
| H | -3.63872800 | -0.41910500 | -1.13899200 |
| H | -0.24702500 | -1.90038600 | -0.57395100 |
| H | 2.36020500  | 2.26186600  | 0.33813800  |
| H | -3.38201700 | 1.85474900  | -0.54169600 |
| H | 2.47625700  | -4.25201200 | -0.49869500 |
| H | 1.22121800  | -3.42854300 | -1.48761000 |
| H | 0.96909900  | -3.66395600 | 0.28498200  |
| H | 4.55128100  | 1.79974500  | -0.32512100 |
| H | 4.29653300  | 1.57100200  | 1.44893900  |
| H | 5.62963800  | 0.70490000  | 0.60862700  |
| H | -3.76034700 | -3.24860700 | 0.97843900  |

**\* GS of F3 at CAM-B3LYP/6-311++G(d,p)**

|   |             |             |             |
|---|-------------|-------------|-------------|
| O | -0.14221700 | 2.63246000  | 0.03685600  |
| O | 2.38687400  | -2.22241700 | -0.24444900 |
| O | 3.75074000  | -0.08126600 | 0.23265000  |
| O | -3.54745600 | -2.72216800 | 0.15880200  |
| O | -1.88088500 | 3.98553800  | -0.04461600 |
| O | -2.62706400 | -1.29928700 | 1.61672300  |
| C | -0.34864200 | 0.26108700  | -0.29605000 |
| C | -1.77173500 | 0.43945100  | -0.46929800 |
| C | 0.41720600  | 1.38878900  | -0.04370000 |
| C | -2.66275500 | -0.73860900 | -0.73795900 |
| C | 0.31462000  | -0.98162900 | -0.36815900 |
| C | 1.67316800  | -1.07450800 | -0.19125200 |
| C | 1.79521700  | 1.32356800  | 0.14016500  |
| C | 2.42972400  | 0.10070800  | 0.07051500  |
| C | -2.29458400 | 1.68096100  | -0.39504300 |
| C | -1.48208000 | 2.84558600  | -0.13105800 |
| C | -2.91848700 | -1.58746600 | 0.48555200  |
| C | 1.68789400  | -3.43306400 | -0.49939400 |
| C | 4.56490000  | 1.05728100  | 0.49617500  |
| H | -2.25737700 | -1.37811500 | -1.52431500 |
| H | -3.63743300 | -0.40001700 | -1.09493900 |
| H | -0.25645900 | -1.87520700 | -0.56951000 |
| H | 2.33584900  | 2.23800500  | 0.33357300  |

|   |             |             |             |
|---|-------------|-------------|-------------|
| H | -3.35215300 | 1.86514200  | -0.52444200 |
| H | 2.43991900  | -4.21767900 | -0.49693500 |
| H | 1.19467700  | -3.40440600 | -1.47431900 |
| H | 0.95011000  | -3.63294500 | 0.28179600  |
| H | 4.51460600  | 1.77142900  | -0.32862000 |
| H | 4.26590800  | 1.54300200  | 1.42756600  |
| H | 5.57938600  | 0.68003700  | 0.59078900  |
| H | -3.72364400 | -3.22504800 | 0.96867800  |

**\* GS of F3 at M06/6-311++G(d,p)**

|   |             |             |             |
|---|-------------|-------------|-------------|
| O | -0.17510700 | 2.62799700  | 0.03404500  |
| O | 2.39837300  | -2.19725300 | -0.24340100 |
| O | 3.73817000  | -0.04716800 | 0.23031900  |
| O | -3.45193600 | -2.77100200 | 0.16134700  |
| O | -1.92809300 | 3.96666100  | -0.03822400 |
| O | -2.58914500 | -1.30840700 | 1.61819000  |
| C | -0.35913400 | 0.25669100  | -0.30120700 |
| C | -1.77668100 | 0.42069000  | -0.47333000 |
| C | 0.39593600  | 1.39634600  | -0.04729000 |
| C | -2.64942100 | -0.76428300 | -0.73422900 |
| C | 0.31481100  | -0.97929200 | -0.37157300 |
| C | 1.67551100  | -1.06117000 | -0.19310900 |
| C | 1.77309300  | 1.34079400  | 0.13664500  |
| C | 2.42050700  | 0.12228000  | 0.06790000  |
| C | -2.31529600 | 1.65981900  | -0.39283800 |
| C | -1.52215000 | 2.83132500  | -0.12928600 |
| C | -2.87022700 | -1.61484900 | 0.49022600  |
| C | 1.70998400  | -3.40598300 | -0.49580200 |
| C | 4.53308800  | 1.09646000  | 0.49361800  |
| H | -2.24805700 | -1.39789800 | -1.53304300 |
| H | -3.63870300 | -0.44182400 | -1.07792200 |
| H | -0.25127300 | -1.88091400 | -0.57389300 |
| H | 2.30646400  | 2.26300800  | 0.33112500  |
| H | -3.37901200 | 1.82774200  | -0.52056200 |
| H | 2.46241200  | -4.19337900 | -0.49440500 |
| H | 1.21221000  | -3.38378100 | -1.47239800 |
| H | 0.96927600  | -3.61234500 | 0.28575900  |
| H | 4.47583500  | 1.81446700  | -0.33168800 |
| H | 4.22636700  | 1.58318200  | 1.42581900  |
| H | 5.55680900  | 0.73923300  | 0.59192500  |

|   |             |             |            |
|---|-------------|-------------|------------|
| H | -3.61055600 | -3.27706700 | 0.97273100 |
|---|-------------|-------------|------------|

**\* GS of F3 at M06-2X/6-311++G(d,p)**

|   |             |             |             |
|---|-------------|-------------|-------------|
| O | -0.19631500 | 2.64713000  | 0.04142900  |
| O | 2.37981400  | -2.18608300 | -0.25636700 |
| O | 3.72373000  | -0.03708900 | 0.21235100  |
| O | -3.36269300 | -2.83059000 | 0.16512400  |
| O | -1.95087000 | 3.97894600  | -0.01833700 |
| O | -2.42820700 | -1.39353600 | 1.60181100  |
| C | -0.38073000 | 0.27324500  | -0.29722900 |
| C | -1.80952800 | 0.43557000  | -0.45861000 |
| C | 0.37455100  | 1.41058100  | -0.04594900 |
| C | -2.67476600 | -0.76268400 | -0.72087500 |
| C | 0.29011700  | -0.96754600 | -0.37401700 |
| C | 1.65316600  | -1.04745600 | -0.20237600 |
| C | 1.75769800  | 1.35878900  | 0.13112900  |
| C | 2.40144400  | 0.13750400  | 0.05685600  |
| C | -2.34962600 | 1.67021400  | -0.37174300 |
| C | -1.54020200 | 2.84652300  | -0.11162900 |
| C | -2.78645800 | -1.66790900 | 0.48782300  |
| C | 1.67676500  | -3.39548400 | -0.50008900 |
| C | 4.51625000  | 1.11526600  | 0.47463200  |
| H | -2.29852100 | -1.35100000 | -1.56153800 |
| H | -3.68921600 | -0.45434600 | -0.98341400 |
| H | -0.27765000 | -1.86567100 | -0.57427400 |
| H | 2.28980700  | 2.27953100  | 0.32375800  |
| H | -3.41094800 | 1.84506200  | -0.48727500 |
| H | 2.42592800  | -4.18257100 | -0.49859800 |
| H | 1.17673800  | -3.36644200 | -1.47181300 |
| H | 0.94310700  | -3.58472800 | 0.28818400  |
| H | 4.44702600  | 1.82759000  | -0.35078200 |
| H | 4.20590800  | 1.59351000  | 1.40655700  |
| H | 5.53804000  | 0.75823800  | 0.56724200  |
| H | -3.44598900 | -3.36908600 | 0.96632400  |

**\* GS of F3 at PBE/6-311++G(d,p)**

|   |             |             |             |
|---|-------------|-------------|-------------|
| O | -0.15059600 | 2.65683400  | 0.03262400  |
| O | 2.42077600  | -2.22917100 | -0.24137500 |
| O | 3.78054300  | -0.06971600 | 0.23948100  |
| O | -3.49096400 | -2.79634700 | 0.14452900  |

|   |             |             |             |
|---|-------------|-------------|-------------|
| O | -1.92630700 | 4.01790300  | -0.05084100 |
| O | -2.70511000 | -1.29093100 | 1.64655600  |
| C | -0.35656200 | 0.25723500  | -0.30280600 |
| C | -1.77785000 | 0.42695100  | -0.47641800 |
| C | 0.41538900  | 1.40858700  | -0.04652400 |
| C | -2.66710700 | -0.75997500 | -0.74093700 |
| C | 0.31929700  | -0.99016100 | -0.37234700 |
| C | 1.69260800  | -1.07894500 | -0.19099700 |
| C | 1.80157600  | 1.34505000  | 0.14058100  |
| C | 2.44958800  | 0.11125800  | 0.07345700  |
| C | -2.31973700 | 1.68529500  | -0.40003900 |
| C | -1.52814100 | 2.86104600  | -0.13961200 |
| C | -2.92988600 | -1.61158100 | 0.49335900  |
| C | 1.70955000  | -3.44878500 | -0.50254200 |
| C | 4.58859100  | 1.09120400  | 0.50636900  |
| H | -2.25858500 | -1.40644000 | -1.53381800 |
| H | -3.65111900 | -0.42213600 | -1.10459700 |
| H | -0.25226600 | -1.89479800 | -0.57555500 |
| H | 2.34664300  | 2.26775500  | 0.33573600  |
| H | -3.38992700 | 1.85110300  | -0.53097900 |
| H | 2.46969200  | -4.23817300 | -0.49909400 |
| H | 1.21439900  | -3.41651500 | -1.48704900 |
| H | 0.96378600  | -3.64977100 | 0.28417600  |
| H | 4.53314000  | 1.80874100  | -0.32747700 |
| H | 4.27901000  | 1.57836600  | 1.44450900  |
| H | 5.61318600  | 0.71609300  | 0.60455000  |
| H | -3.67859400 | -3.28588600 | 0.97253400  |

**\* GS of F3 at PW6B95D3/6-311++G(d,p)**

|   |             |             |             |
|---|-------------|-------------|-------------|
| O | -0.17358600 | 2.64151300  | 0.04288400  |
| O | 2.35899300  | -2.19962100 | -0.25568200 |
| O | 3.71884900  | -0.06009700 | 0.20972600  |
| O | -3.42454600 | -2.78227400 | 0.15212200  |
| O | -1.91737300 | 3.98870700  | -0.01632000 |
| O | -2.41555300 | -1.40459700 | 1.59470700  |
| C | -0.37546100 | 0.27402000  | -0.29341500 |
| C | -1.79224500 | 0.44547500  | -0.45120200 |
| C | 0.38843600  | 1.40617900  | -0.04372600 |
| C | -2.66959400 | -0.73707500 | -0.71318000 |
| C | 0.28683300  | -0.96529400 | -0.37020000 |

|   |             |             |             |
|---|-------------|-------------|-------------|
| C | 1.64619200  | -1.05585300 | -0.20063100 |
| C | 1.76462400  | 1.34213500  | 0.13046700  |
| C | 2.40002400  | 0.11909800  | 0.05602500  |
| C | -2.32347600 | 1.68570900  | -0.36503400 |
| C | -1.51865200 | 2.84949500  | -0.10975400 |
| C | -2.79975100 | -1.64855500 | 0.48180300  |
| C | 1.64499700  | -3.40113800 | -0.49488200 |
| C | 4.51933400  | 1.08567600  | 0.46737200  |
| H | -2.30262400 | -1.32451000 | -1.55443000 |
| H | -3.67440600 | -0.41457400 | -0.98076300 |
| H | -0.28363900 | -1.85722700 | -0.56806500 |
| H | 2.30574900  | 2.25339800  | 0.32151900  |
| H | -3.38116100 | 1.85953500  | -0.48029900 |
| H | 2.38444800  | -4.19281400 | -0.49299000 |
| H | 1.14370400  | -3.37131800 | -1.46237600 |
| H | 0.91238000  | -3.58223100 | 0.29177100  |
| H | 4.45324600  | 1.79644300  | -0.35529400 |
| H | 4.21788300  | 1.56706000  | 1.39673400  |
| H | 5.53562900  | 0.72228800  | 0.55635200  |
| H | -3.51304800 | -3.32433900 | 0.94649200  |

**\* GS of F3 at WB97XD/6-311++G(d,p)**

|   |             |             |             |
|---|-------------|-------------|-------------|
| O | -0.17074300 | 2.64116300  | 0.03737100  |
| O | 2.38034900  | -2.20149700 | -0.25200200 |
| O | 3.73419900  | -0.05662900 | 0.22456400  |
| O | -3.41483600 | -2.79822700 | 0.15761200  |
| O | -1.91610200 | 3.98438600  | -0.03047800 |
| O | -2.55218100 | -1.34004300 | 1.61756500  |
| C | -0.36663800 | 0.26944200  | -0.30184300 |
| C | -1.79267300 | 0.43779800  | -0.46583500 |
| C | 0.39297800  | 1.40265500  | -0.04795700 |
| C | -2.67182400 | -0.75086900 | -0.72857200 |
| C | 0.30186300  | -0.97119900 | -0.37691400 |
| C | 1.66268400  | -1.05913000 | -0.19962400 |
| C | 1.77366700  | 1.34336700  | 0.13437700  |
| C | 2.41466900  | 0.12141800  | 0.06313100  |
| C | -2.32346900 | 1.67726000  | -0.38240400 |
| C | -1.51212700 | 2.84639700  | -0.12167500 |
| C | -2.85033200 | -1.63334000 | 0.48829700  |
| C | 1.68197200  | -3.41190600 | -0.49654900 |

|   |             |             |             |
|---|-------------|-------------|-------------|
| C | 4.54014200  | 1.08400800  | 0.49070100  |
| H | -2.28495300 | -1.35921100 | -1.54982200 |
| H | -3.67010200 | -0.42560900 | -1.03192500 |
| H | -0.26671200 | -1.86779100 | -0.58018900 |
| H | 2.31046000  | 2.26102200  | 0.32936400  |
| H | -3.38419300 | 1.85558300  | -0.50055100 |
| H | 2.43468400  | -4.19702100 | -0.49069200 |
| H | 1.18544000  | -3.39094900 | -1.47172000 |
| H | 0.94513200  | -3.60738100 | 0.28889400  |
| H | 4.48755400  | 1.80083000  | -0.33361800 |
| H | 4.23796300  | 1.56720000  | 1.42415200  |
| H | 5.55743400  | 0.71196600  | 0.58572500  |
| H | -3.54366900 | -3.31725100 | 0.96252000  |

**\* ES of F3 at PBE0/6-311++G(d,p)**

|   |             |             |             |
|---|-------------|-------------|-------------|
| O | -0.00679600 | 2.63719200  | 0.02825600  |
| O | 2.31577800  | -2.26957900 | -0.22727500 |
| O | 3.78416800  | -0.19554400 | 0.22934600  |
| O | -3.77221200 | -2.57723300 | 0.12428100  |
| O | -1.70836900 | 4.05823500  | -0.01713300 |
| O | -2.75478200 | -1.25422900 | 1.61195900  |
| C | -0.34915000 | 0.25156100  | -0.30537700 |
| C | -1.75492900 | 0.45300200  | -0.48438400 |
| C | 0.49111400  | 1.39022200  | -0.04783800 |
| C | -2.67986800 | -0.68067200 | -0.74863300 |
| C | 0.28071700  | -0.98815700 | -0.36067400 |
| C | 1.66693300  | -1.12070200 | -0.18321600 |
| C | 1.86457600  | 1.27459500  | 0.13256800  |
| C | 2.48043400  | 0.03484700  | 0.06964000  |
| C | -2.23377700 | 1.76698600  | -0.37772500 |
| C | -1.41157100 | 2.87794300  | -0.12661300 |
| C | -3.04790800 | -1.50337800 | 0.46939400  |
| C | 1.60445900  | -3.48510400 | -0.46226200 |
| C | 4.63578700  | 0.91379100  | 0.48576300  |
| H | -2.29127000 | -1.37577700 | -1.50401700 |
| H | -3.62440400 | -0.31005500 | -1.16275200 |
| H | -0.30593300 | -1.87679900 | -0.54997300 |
| H | 2.42886500  | 2.17850600  | 0.32187400  |
| H | -3.28949100 | 1.98430900  | -0.49307900 |
| H | 2.35790700  | -4.26835100 | -0.44209600 |

|   |             |             |             |
|---|-------------|-------------|-------------|
| H | 1.11876000  | -3.45979600 | -1.44025700 |
| H | 0.86781200  | -3.65490000 | 0.32613200  |
| H | 4.60456200  | 1.62621800  | -0.34412200 |
| H | 4.35210500  | 1.41334700  | 1.41694100  |
| H | 5.63789300  | 0.50126500  | 0.57959800  |
| H | -4.00000200 | -3.05830900 | 0.93241800  |

**\* ES of F3 at APFD/6-311++G(d,p)**

|   |             |             |             |
|---|-------------|-------------|-------------|
| O | -0.06365700 | 2.66355700  | -0.03917400 |
| O | 2.31945600  | -2.22193900 | -0.23184900 |
| O | 3.75536000  | -0.14183500 | 0.22624500  |
| O | -3.59136100 | -2.70324400 | 0.14273500  |
| O | -1.81278200 | 4.04141700  | 0.05699000  |
| O | -2.55139800 | -1.35412500 | 1.60316500  |
| C | -0.38013500 | 0.26723500  | -0.33240100 |
| C | -1.79197900 | 0.44797700  | -0.49351300 |
| C | 0.44556400  | 1.41772300  | -0.08065500 |
| C | -2.69341300 | -0.70805900 | -0.73857300 |
| C | 0.26065500  | -0.96502900 | -0.38182000 |
| C | 1.65069800  | -1.08212300 | -0.19589100 |
| C | 1.81868500  | 1.31818600  | 0.11563000  |
| C | 2.44899400  | 0.08295000  | 0.06006600  |
| C | -2.29954200 | 1.74430000  | -0.33234600 |
| C | -1.49157900 | 2.87209700  | -0.09911100 |
| C | -2.91594800 | -1.59086900 | 0.47689300  |
| C | 1.62869500  | -3.45247100 | -0.46240000 |
| C | 4.60189600  | 0.97207900  | 0.48821200  |
| H | -2.34027000 | -1.35561400 | -1.55222400 |
| H | -3.68379400 | -0.36308200 | -1.05608800 |
| H | -0.31672500 | -1.86012200 | -0.56960300 |
| H | 2.37190700  | 2.22965000  | 0.30329800  |
| H | -3.36498100 | 1.93677700  | -0.39117300 |
| H | 2.39560700  | -4.22185000 | -0.43344300 |
| H | 1.14751800  | -3.44127800 | -1.44279800 |
| H | 0.89168300  | -3.62875500 | 0.32414100  |
| H | 4.57296700  | 1.68418300  | -0.34204800 |
| H | 4.31033700  | 1.47027700  | 1.41768300  |
| H | 5.60453500  | 0.56288200  | 0.58804100  |
| H | -3.72927600 | -3.22769200 | 0.94477100  |



**\* ES of F3 at B3LYP/6-311++G(d,p)**

|   |             |             |             |
|---|-------------|-------------|-------------|
| O | 0.00221800  | 2.64480000  | 0.02639000  |
| O | 2.33564800  | -2.28154900 | -0.22555600 |
| O | 3.81565000  | -0.19662300 | 0.23487800  |
| O | -3.84777700 | -2.56040400 | 0.11794400  |
| O | -1.71903200 | 4.07051200  | -0.02380100 |
| O | -2.81821200 | -1.24820500 | 1.62206000  |
| C | -0.33918800 | 0.25069800  | -0.30627600 |
| C | -1.75558900 | 0.45220300  | -0.48724100 |
| C | 0.50299000  | 1.38902300  | -0.04878500 |
| C | -2.68892400 | -0.68389600 | -0.75311600 |
| C | 0.29348200  | -0.98911100 | -0.36131900 |
| C | 1.68718800  | -1.12412800 | -0.18119500 |
| C | 1.88182300  | 1.27394500  | 0.13387900  |
| C | 2.50204400  | 0.03404800  | 0.07265700  |
| C | -2.23793200 | 1.76754500  | -0.38273000 |
| C | -1.42314200 | 2.88620700  | -0.13204400 |
| C | -3.09772000 | -1.49403200 | 0.47232300  |
| C | 1.63012700  | -3.51712300 | -0.46289500 |
| C | 4.68281700  | 0.91659400  | 0.49465600  |
| H | -2.29113500 | -1.39348500 | -1.48816200 |
| H | -3.61987800 | -0.31095000 | -1.19300500 |
| H | -0.28923000 | -1.87802100 | -0.55071400 |
| H | 2.44328200  | 2.17791200  | 0.32266800  |
| H | -3.29350600 | 1.97929800  | -0.50045000 |
| H | 2.39493100  | -4.28776100 | -0.43755000 |
| H | 1.15006600  | -3.49571600 | -1.44214500 |
| H | 0.89499900  | -3.69006100 | 0.32418600  |
| H | 4.65520400  | 1.62821200  | -0.33447400 |
| H | 4.40255100  | 1.41451900  | 1.42634200  |
| H | 5.67961100  | 0.49299600  | 0.58632200  |
| H | -4.10269800 | -3.03703900 | 0.92418600  |

**\* ES of F3 at BP86/6-311++G(d,p)**

|   |             |             |             |
|---|-------------|-------------|-------------|
| O | -0.00541100 | 2.66763900  | 0.04168200  |
| O | 2.34812200  | -2.29160800 | -0.24095800 |
| O | 3.84275700  | -0.19432900 | 0.24162100  |
| O | -3.76067300 | -2.64846800 | 0.12932900  |
| O | -1.75261900 | 4.09464100  | -0.04644000 |
| O | -2.85022600 | -1.23356800 | 1.65062100  |

|   |             |             |             |
|---|-------------|-------------|-------------|
| C | -0.34421200 | 0.26525500  | -0.30800600 |
| C | -1.78100600 | 0.45215000  | -0.49640500 |
| C | 0.49265200  | 1.39318000  | -0.04510500 |
| C | -2.70598200 | -0.69626600 | -0.74756800 |
| C | 0.29483300  | -0.97868400 | -0.37348400 |
| C | 1.70019400  | -1.11730400 | -0.18853400 |
| C | 1.88528400  | 1.27906800  | 0.13921200  |
| C | 2.51607100  | 0.03849300  | 0.07418800  |
| C | -2.26237800 | 1.77231400  | -0.39944600 |
| C | -1.44977700 | 2.90133200  | -0.14417500 |
| C | -3.08779800 | -1.51689600 | 0.48824800  |
| C | 1.62327600  | -3.52553900 | -0.48608300 |
| C | 4.68809400  | 0.94243300  | 0.51437700  |
| H | -2.31675600 | -1.40570800 | -1.50114000 |
| H | -3.65765000 | -0.32830300 | -1.17156600 |
| H | -0.29050000 | -1.87522100 | -0.57846900 |
| H | 2.44772900  | 2.19216900  | 0.33553600  |
| H | -3.32618900 | 1.98586000  | -0.52767100 |
| H | 2.38826100  | -4.30795200 | -0.46237000 |
| H | 1.14257500  | -3.49222100 | -1.47423600 |
| H | 0.88026200  | -3.69326000 | 0.30653200  |
| H | 4.65229400  | 1.66366200  | -0.31849400 |
| H | 4.38836200  | 1.43503800  | 1.45382900  |
| H | 5.70034300  | 0.53447300  | 0.61246900  |
| H | -3.99983300 | -3.12022100 | 0.95541200  |

**\* ES of F3 at CAM-B3LYP/6-311++G(d,p)**

|   |             |             |             |
|---|-------------|-------------|-------------|
| O | -0.02106300 | 2.63710100  | 0.02886400  |
| O | 2.33979100  | -2.26359800 | -0.22058700 |
| O | 3.77538600  | -0.17464700 | 0.22824900  |
| O | -3.82434400 | -2.54706000 | 0.13109200  |
| O | -1.73612700 | 4.04426800  | -0.01591800 |
| O | -2.73499400 | -1.26682800 | 1.60198700  |
| C | -0.34744000 | 0.24152000  | -0.30602600 |
| C | -1.73441700 | 0.43832000  | -0.48474900 |
| C | 0.49152900  | 1.39698100  | -0.04579200 |
| C | -2.66253300 | -0.69827400 | -0.75810000 |
| C | 0.29619300  | -1.00548900 | -0.35702500 |
| C | 1.66681400  | -1.12127800 | -0.18147700 |
| C | 1.85637800  | 1.28799900  | 0.13350900  |

|   |             |             |             |
|---|-------------|-------------|-------------|
| C | 2.47218900  | 0.04568300  | 0.06973000  |
| C | -2.23464400 | 1.74999400  | -0.37918600 |
| C | -1.42703800 | 2.86817400  | -0.12581200 |
| C | -3.05121400 | -1.50279700 | 0.46453900  |
| C | 1.64084800  | -3.48902600 | -0.45495700 |
| C | 4.63756900  | 0.93514000  | 0.48117900  |
| H | -2.25654600 | -1.39983500 | -1.49329900 |
| H | -3.59424300 | -0.32977000 | -1.19499700 |
| H | -0.28739800 | -1.89362000 | -0.54024800 |
| H | 2.41860500  | 2.19061900  | 0.32193500  |
| H | -3.29140000 | 1.95027600  | -0.49660200 |
| H | 2.40037800  | -4.26449500 | -0.43599800 |
| H | 1.15320800  | -3.46932900 | -1.43047000 |
| H | 0.90747400  | -3.66649500 | 0.33274800  |
| H | 4.60452400  | 1.64315000  | -0.34919800 |
| H | 4.35855900  | 1.43337600  | 1.41160800  |
| H | 5.63547000  | 0.51644300  | 0.57079800  |
| H | -4.06323000 | -3.02589600 | 0.93921200  |

**\* ES of F3 at M06/6-311++G(d,p)**

|   |             |             |             |
|---|-------------|-------------|-------------|
| O | -0.02698800 | 2.63677800  | -0.02791400 |
| O | 2.33046400  | -2.25329100 | -0.21959200 |
| O | 3.77601600  | -0.16811400 | 0.23583500  |
| O | -3.78285000 | -2.56298700 | 0.14388800  |
| O | -1.75338000 | 4.03058800  | 0.02633200  |
| O | -2.67571100 | -1.27860500 | 1.60078500  |
| C | -0.35002500 | 0.24616900  | -0.32628900 |
| C | -1.75088300 | 0.43759100  | -0.50097800 |
| C | 0.48101900  | 1.39436600  | -0.07234100 |
| C | -2.66705600 | -0.70252300 | -0.75472400 |
| C | 0.28767900  | -0.99074600 | -0.36857800 |
| C | 1.67009000  | -1.11114600 | -0.18475500 |
| C | 1.84989600  | 1.28771400  | 0.12214900  |
| C | 2.47304400  | 0.05210100  | 0.06799200  |
| C | -2.25140000 | 1.73806400  | -0.35206900 |
| C | -1.44363100 | 2.86229700  | -0.11377300 |
| C | -3.01661200 | -1.51405700 | 0.47118400  |
| C | 1.63235300  | -3.47399000 | -0.45379200 |
| C | 4.61759000  | 0.94474700  | 0.49478200  |
| H | -2.27614300 | -1.40308800 | -1.50651200 |

|   |             |             |             |
|---|-------------|-------------|-------------|
| H | -3.61746000 | -0.34508400 | -1.17129600 |
| H | -0.29539300 | -1.88452200 | -0.55305600 |
| H | 2.40583000  | 2.19851100  | 0.30878300  |
| H | -3.31573800 | 1.93613700  | -0.43129300 |
| H | 2.38760200  | -4.25609300 | -0.43015100 |
| H | 1.14737100  | -3.45651000 | -1.43352800 |
| H | 0.89186700  | -3.64934100 | 0.33132300  |
| H | 4.58853800  | 1.65673700  | -0.33722000 |
| H | 4.32286600  | 1.44869000  | 1.42161700  |
| H | 5.62447700  | 0.54547400  | 0.59957600  |
| H | -3.99659500 | -3.04937700 | 0.95423000  |

**\* ES of F3 at M06-2X/6-311++G(d,p)**

|   |             |             |             |
|---|-------------|-------------|-------------|
| O | -0.04445700 | 2.66698400  | -0.10331800 |
| O | 2.31269200  | -2.24337900 | -0.22815100 |
| O | 3.73618200  | -0.15788900 | 0.23858200  |
| O | -3.69319800 | -2.62257700 | 0.17680400  |
| O | -1.77548700 | 4.04234300  | 0.08751100  |
| O | -2.47777200 | -1.37376800 | 1.57622100  |
| C | -0.37595700 | 0.26213700  | -0.34712400 |
| C | -1.77022100 | 0.45218800  | -0.49714500 |
| C | 0.46109000  | 1.42397000  | -0.09769200 |
| C | -2.68701600 | -0.69887300 | -0.74685800 |
| C | 0.26372200  | -0.98984700 | -0.38964500 |
| C | 1.63478300  | -1.10412300 | -0.19915400 |
| C | 1.82488500  | 1.31441100  | 0.11635800  |
| C | 2.43780500  | 0.06706600  | 0.06459800  |
| C | -2.28168600 | 1.75009800  | -0.29917800 |
| C | -1.46422700 | 2.87799700  | -0.08989100 |
| C | -2.91732800 | -1.57052700 | 0.47425100  |
| C | 1.60410400  | -3.45926400 | -0.47135600 |
| C | 4.58370300  | 0.95857400  | 0.50420700  |
| H | -2.32518900 | -1.35342500 | -1.54742300 |
| H | -3.66924900 | -0.34571600 | -1.07178300 |
| H | -0.32332200 | -1.87789400 | -0.57214900 |
| H | 2.38640300  | 2.21959100  | 0.29990900  |
| H | -3.34734100 | 1.93916600  | -0.32086800 |
| H | 2.35396900  | -4.24377200 | -0.44720800 |
| H | 1.12490600  | -3.42873600 | -1.45139300 |
| H | 0.86063000  | -3.62687200 | 0.30996000  |

|   |             |             |             |
|---|-------------|-------------|-------------|
| H | 4.55709300  | 1.66215000  | -0.33069900 |
| H | 4.27787700  | 1.45654900  | 1.42674700  |
| H | 5.58320100  | 0.54936800  | 0.61499800  |
| H | -3.82459500 | -3.14696100 | 0.98049900  |

**\* ES of F3 at PBE/6-311++G(d,p)**

|   |             |             |             |
|---|-------------|-------------|-------------|
| O | -0.01005100 | 2.67067300  | 0.02243200  |
| O | 2.33561300  | -2.28539600 | -0.23665600 |
| O | 3.82936800  | -0.19085200 | 0.23707400  |
| O | -3.71306800 | -2.66724400 | 0.12269400  |
| O | -1.75821500 | 4.09083600  | -0.01954900 |
| O | -2.80675700 | -1.25374100 | 1.64362700  |
| C | -0.35052000 | 0.27040500  | -0.31311700 |
| C | -1.78520500 | 0.45647000  | -0.49641500 |
| C | 0.48582300  | 1.39751300  | -0.05474200 |
| C | -2.70636100 | -0.69139900 | -0.74613600 |
| C | 0.28621700  | -0.97316000 | -0.37302000 |
| C | 1.68923200  | -1.11213700 | -0.18824200 |
| C | 1.87609500  | 1.28243800  | 0.13125400  |
| C | 2.50521100  | 0.04229000  | 0.07006500  |
| C | -2.26740600 | 1.77320500  | -0.38275800 |
| C | -1.45278700 | 2.90036400  | -0.13216200 |
| C | -3.05678800 | -1.53003200 | 0.48286200  |
| C | 1.61054700  | -3.51492300 | -0.47448500 |
| C | 4.67286700  | 0.94264500  | 0.50588500  |
| H | -2.32732000 | -1.38720100 | -1.51689800 |
| H | -3.66782100 | -0.32380600 | -1.14603000 |
| H | -0.30058700 | -1.86919500 | -0.57418900 |
| H | 2.43940200  | 2.19523600  | 0.32447200  |
| H | -3.33270800 | 1.98565700  | -0.49439300 |
| H | 2.37206000  | -4.29999300 | -0.44754700 |
| H | 1.12849100  | -3.48679800 | -1.46185100 |
| H | 0.86658400  | -3.67810400 | 0.31790800  |
| H | 4.63795300  | 1.66251500  | -0.32777100 |
| H | 4.37418700  | 1.43913800  | 1.44323200  |
| H | 5.68504600  | 0.53614400  | 0.60530200  |
| H | -3.93195000 | -3.14988300 | 0.94684400  |

**\* ES of F3 at PW6B95D3/6-311++G(d,p)**

|   |             |            |             |
|---|-------------|------------|-------------|
| O | -0.02384300 | 2.65790900 | -0.02870000 |
|---|-------------|------------|-------------|

|   |             |             |             |
|---|-------------|-------------|-------------|
| O | 2.27260000  | -2.25440200 | -0.23822700 |
| O | 3.74567300  | -0.18884000 | 0.21730700  |
| O | -3.71329200 | -2.59575200 | 0.15195100  |
| O | -1.73694900 | 4.06323800  | 0.05739500  |
| O | -2.46221900 | -1.40471600 | 1.56807100  |
| C | -0.37317600 | 0.27393100  | -0.31958600 |
| C | -1.77643200 | 0.47530000  | -0.47473800 |
| C | 0.46985800  | 1.40919200  | -0.07204600 |
| C | -2.69540900 | -0.66269400 | -0.72854000 |
| C | 0.24759600  | -0.96711400 | -0.37294200 |
| C | 1.62836000  | -1.10300300 | -0.19621900 |
| C | 1.83773700  | 1.28821500  | 0.11668000  |
| C | 2.44365500  | 0.04680500  | 0.05652900  |
| C | -2.26178000 | 1.77800400  | -0.31946200 |
| C | -1.43969200 | 2.88960500  | -0.09157700 |
| C | -2.92106700 | -1.56215000 | 0.46682900  |
| C | 1.54711700  | -3.46337500 | -0.47084600 |
| C | 4.59804600  | 0.92121500  | 0.47512200  |
| H | -2.34993200 | -1.30330500 | -1.54492900 |
| H | -3.67534100 | -0.30101100 | -1.03945600 |
| H | -0.34185200 | -1.84937700 | -0.55513300 |
| H | 2.40490400  | 2.18536500  | 0.30097600  |
| H | -3.31890600 | 1.98500200  | -0.38167600 |
| H | 2.28774800  | -4.25158300 | -0.45053900 |
| H | 1.06198300  | -3.42975900 | -1.44331100 |
| H | 0.81217600  | -3.61835800 | 0.31536300  |
| H | 4.56601500  | 1.62764700  | -0.35322300 |
| H | 4.30795100  | 1.41910300  | 1.39925800  |
| H | 5.59476400  | 0.51044200  | 0.57295400  |
| H | -3.83414500 | -3.13724400 | 0.94211700  |

**\* ES of F3 at WB97XD/6-311++G(d,p)**

|   |             |             |             |
|---|-------------|-------------|-------------|
| O | -0.03920200 | 2.64858200  | 0.01754600  |
| O | 2.32436900  | -2.25140800 | -0.22280500 |
| O | 3.75792800  | -0.16369300 | 0.22527100  |
| O | -3.68276900 | -2.63667800 | 0.13393200  |
| O | -1.75729800 | 4.05004400  | 0.00430900  |
| O | -2.68384200 | -1.28220900 | 1.60421200  |
| C | -0.36448900 | 0.25297800  | -0.31394300 |
| C | -1.75235900 | 0.44575800  | -0.48876800 |

|   |             |             |             |
|---|-------------|-------------|-------------|
| C | 0.47300000  | 1.41144400  | -0.05244200 |
| C | -2.67111300 | -0.70085400 | -0.75539400 |
| C | 0.27918400  | -0.99585000 | -0.36442700 |
| C | 1.65101000  | -1.11114300 | -0.18613600 |
| C | 1.84010300  | 1.30251800  | 0.12982000  |
| C | 2.45657200  | 0.05799700  | 0.06632100  |
| C | -2.25786800 | 1.75612700  | -0.36845500 |
| C | -1.44687900 | 2.87567400  | -0.11721800 |
| C | -2.98947100 | -1.54020500 | 0.46754900  |
| C | 1.62143300  | -3.47225800 | -0.45441900 |
| C | 4.61579500  | 0.94631500  | 0.47720800  |
| H | -2.28147200 | -1.37444000 | -1.52640500 |
| H | -3.62906300 | -0.33937800 | -1.14099100 |
| H | -0.30632600 | -1.88399500 | -0.54953600 |
| H | 2.40234400  | 2.20615100  | 0.31927000  |
| H | -3.31750300 | 1.95393400  | -0.47146300 |
| H | 2.37810600  | -4.25160400 | -0.43351200 |
| H | 1.13340100  | -3.45341000 | -1.43136400 |
| H | 0.88595700  | -3.64577700 | 0.33425100  |
| H | 4.58263500  | 1.65465500  | -0.35479100 |
| H | 4.33562400  | 1.44603500  | 1.40819300  |
| H | 5.61536200  | 0.52964800  | 0.56807300  |
| H | -3.88205600 | -3.12992300 | 0.94038400  |

**S3-F4. The coordinates of the optimized structures for the GS and ES of F4 compound**

**\* GS of F4 at PBE0/6-311++G(d,p)**

|   |             |             |             |
|---|-------------|-------------|-------------|
| O | 0.96869600  | -1.32516400 | -0.00003400 |
| O | -3.44986900 | 0.39893700  | -0.00003000 |
| O | 2.98186100  | -2.23041400 | 0.00001300  |
| N | 5.42328500  | 0.39968500  | 0.00010700  |
| C | 0.62723100  | 1.05109800  | -0.00004600 |
| C | 0.12716500  | -0.25969100 | -0.00003400 |
| C | -2.12247000 | 0.53496900  | -0.00003200 |
| C | -1.22989300 | -0.53650900 | -0.00002600 |
| C | -0.30105100 | 2.11346800  | -0.00005900 |
| C | -1.64737900 | 1.86518600  | -0.00005400 |
| C | 2.02917000  | 1.22504200  | -0.00003700 |
| C | 2.86245100  | 0.14130500  | -0.00002800 |
| C | -4.01937000 | -0.91685800 | 0.00007200  |

|   |             |             |             |
|---|-------------|-------------|-------------|
| C | 2.33362900  | -1.21444500 | -0.00005500 |
| C | -5.51815400 | -0.76631100 | 0.00016000  |
| C | 4.27373100  | 0.28128600  | -0.00000100 |
| H | -1.55538200 | -1.56782000 | -0.00002700 |
| H | 0.06839100  | 3.13333800  | -0.00006900 |
| H | -2.37093700 | 2.67167500  | -0.00006300 |
| H | 2.44266700  | 2.22850400  | -0.00003600 |
| H | -3.67455400 | -1.45439000 | -0.88990100 |
| H | -3.67443200 | -1.45430100 | 0.89005000  |
| H | -5.98149800 | -1.75590100 | 0.00022300  |
| H | -5.85651000 | -0.22846800 | 0.88882700  |
| H | -5.85661500 | -0.22853200 | -0.88850500 |

**\* GS of F4 at APFD/6-311++G(d,p)**

|   |             |             |             |
|---|-------------|-------------|-------------|
| O | 0.97140600  | -1.33335100 | 0.00007900  |
| O | -3.45317400 | 0.39654400  | 0.00000000  |
| O | 2.99860500  | -2.22620500 | -0.00001100 |
| N | 5.42630800  | 0.40875500  | -0.00035600 |
| C | 0.62686000  | 1.04991900  | 0.00001000  |
| C | 0.12952000  | -0.26515500 | 0.00003900  |
| C | -2.12330800 | 0.52654900  | 0.00000600  |
| C | -1.22650700 | -0.54544900 | 0.00003400  |
| C | -0.30346200 | 2.11064400  | -0.00002200 |
| C | -1.65034200 | 1.85851900  | -0.00002200 |
| C | 2.02834400  | 1.22743200  | -0.00001000 |
| C | 2.86513300  | 0.14532700  | 0.00002100  |
| C | -4.03077300 | -0.91763700 | 0.00005400  |
| C | 2.34129200  | -1.21470200 | 0.00014100  |
| C | -5.53080800 | -0.75325000 | 0.00007200  |
| C | 4.27612500  | 0.28892600  | -0.00003900 |
| H | -1.54896300 | -1.57804100 | 0.00005400  |
| H | 0.06491500  | 3.13132300  | -0.00005000 |
| H | -2.37670000 | 2.66312200  | -0.00004700 |
| H | 2.43959700  | 2.23214700  | -0.00006600 |
| H | -3.68767000 | -1.45642700 | -0.89005200 |
| H | -3.68764200 | -1.45636500 | 0.89018700  |
| H | -6.00661100 | -1.73725200 | 0.00010700  |
| H | -5.86409900 | -0.21119600 | 0.88842000  |
| H | -5.86412600 | -0.21124900 | -0.88830000 |



**\* GS of F4 at B3LYP/6-311++G(d,p)**

|   |             |             |             |
|---|-------------|-------------|-------------|
| O | 0.97778900  | -1.33601100 | 0.00005000  |
| O | -3.46330900 | 0.39850700  | 0.00001500  |
| O | 3.00413900  | -2.24033500 | 0.00002300  |
| N | 5.44249900  | 0.41744000  | -0.00027300 |
| C | 0.63219100  | 1.04967100  | -0.00000900 |
| C | 0.12809200  | -0.26433600 | 0.00002300  |
| C | -2.12703700 | 0.53265400  | 0.00001000  |
| C | -1.23176700 | -0.54165800 | 0.00003100  |
| C | -0.29972000 | 2.11507200  | -0.00003200 |
| C | -1.64928400 | 1.86615700  | -0.00002200 |
| C | 2.03729000  | 1.22384900  | -0.00002700 |
| C | 2.87904200  | 0.14114900  | -0.00000100 |
| C | -4.05488900 | -0.92314600 | 0.00006100  |
| C | 2.35431600  | -1.22072000 | 0.00006500  |
| C | -5.55890300 | -0.75087200 | 0.00008000  |
| C | 4.29280900  | 0.29097200  | -0.00002600 |
| H | -1.55759800 | -1.57121600 | 0.00005400  |
| H | 0.06844800  | 3.13413200  | -0.00005800 |
| H | -2.37104100 | 2.67274100  | -0.00003900 |
| H | 2.44769500  | 2.22716600  | -0.00006400 |
| H | -3.71617100 | -1.46139200 | -0.88984200 |
| H | -3.71614300 | -1.46134300 | 0.88998400  |
| H | -6.03466700 | -1.73440800 | 0.00011000  |
| H | -5.88988800 | -0.20888100 | 0.88847200  |
| H | -5.88991400 | -0.20892400 | -0.88832900 |

**\* GS of F4 at BP86/6-311++G(d,p)**

|   |             |             |             |
|---|-------------|-------------|-------------|
| O | 0.97517400  | -1.34830900 | 0.00008700  |
| O | -3.48440500 | 0.41062800  | 0.00002000  |
| O | 3.02252800  | -2.25831700 | -0.00003300 |
| N | 5.47066400  | 0.42206900  | -0.00032700 |
| C | 0.63540900  | 1.05725400  | 0.00000900  |
| C | 0.12535400  | -0.26712900 | 0.00004400  |
| C | -2.14008700 | 0.54071200  | 0.00001900  |
| C | -1.24188300 | -0.54298400 | 0.00004600  |
| C | -0.30121100 | 2.12928000  | -0.00002300 |
| C | -1.65871600 | 1.88121000  | -0.00001600 |
| C | 2.04205600  | 1.23321900  | -0.00002200 |
| C | 2.89286000  | 0.14047600  | 0.00000700  |

|   |             |             |             |
|---|-------------|-------------|-------------|
| C | -4.06744100 | -0.92865800 | 0.00005700  |
| C | 2.37263200  | -1.22679900 | 0.00015100  |
| C | -5.57606600 | -0.76807500 | 0.00005900  |
| C | 4.30737900  | 0.29254900  | -0.00008200 |
| H | -1.57361300 | -1.58036000 | 0.00007300  |
| H | 0.07230600  | 3.15591700  | -0.00005700 |
| H | -2.38553000 | 2.69529300  | -0.00004000 |
| H | 2.45664800  | 2.24454700  | -0.00009000 |
| H | -3.71725100 | -1.46518900 | -0.89781700 |
| H | -3.71724500 | -1.46514300 | 0.89795700  |
| H | -6.04526700 | -1.76395000 | 0.00008400  |
| H | -5.91639500 | -0.22695900 | 0.89558800  |
| H | -5.91640100 | -0.22700200 | -0.89549400 |

**\* GS of F4 at CAM-B3LYP/6-311++G(d,p)**

|   |             |             |             |
|---|-------------|-------------|-------------|
| O | 0.97166400  | -1.32712300 | 0.00014700  |
| O | -3.45043500 | 0.39691500  | 0.00000200  |
| O | 2.98620300  | -2.22717600 | 0.00000000  |
| N | 5.42277400  | 0.40372000  | -0.00073700 |
| C | 0.62646800  | 1.04618400  | 0.00005300  |
| C | 0.12644800  | -0.25782400 | 0.00008400  |
| C | -2.11887400 | 0.53284800  | 0.00002100  |
| C | -1.22983400 | -0.53609300 | 0.00006400  |
| C | -0.29960400 | 2.10833300  | 0.00000500  |
| C | -1.64375500 | 1.86113700  | -0.00000800 |
| C | 2.03333100  | 1.21954600  | 0.00002800  |
| C | 2.86313600  | 0.14289800  | 0.00007500  |
| C | -4.02878600 | -0.91835500 | 0.00003900  |
| C | 2.33446600  | -1.21525000 | 0.00026100  |
| C | -5.52841000 | -0.75648700 | 0.00002300  |
| C | 4.27943900  | 0.28421000  | -0.00000600 |
| H | -1.55330500 | -1.56582900 | 0.00008700  |
| H | 0.06945900  | 3.12656200  | -0.00002900 |
| H | -2.36619800 | 2.66629200  | -0.00004600 |
| H | 2.44430800  | 2.22220000  | -0.00005200 |
| H | -3.68811300 | -1.45585300 | -0.88869400 |
| H | -3.68812700 | -1.45579700 | 0.88881200  |
| H | -6.00042300 | -1.74038800 | 0.00004700  |
| H | -5.86032600 | -0.21549100 | 0.88731300  |
| H | -5.86031100 | -0.21554200 | -0.88730400 |

**\* GS of F4 at M06/6-311++G(d,p)**

|   |             |             |             |
|---|-------------|-------------|-------------|
| O | 0.96997600  | -1.32481000 | -0.00007600 |
| O | -3.44731200 | 0.39514800  | 0.00003800  |
| O | 2.98648500  | -2.22495300 | 0.00002500  |
| N | 5.41898300  | 0.40523200  | 0.00040800  |
| C | 0.62411600  | 1.04766900  | -0.00009300 |
| C | 0.12637600  | -0.26140400 | -0.00005600 |
| C | -2.12093400 | 0.53039800  | -0.00000300 |
| C | -1.22896100 | -0.53870400 | -0.00000900 |
| C | -0.30355700 | 2.10823900  | -0.00008300 |
| C | -1.64724100 | 1.85918100  | -0.00004000 |
| C | 2.02471500  | 1.22252100  | -0.00010700 |
| C | 2.85900400  | 0.14293400  | -0.00011600 |
| C | -4.01969400 | -0.91779100 | 0.00009300  |
| C | 2.33603000  | -1.21379100 | -0.00018400 |
| C | -5.51285300 | -0.75806400 | 0.00015100  |
| C | 4.27027000  | 0.28565900  | -0.00009100 |
| H | -1.55102400 | -1.57219500 | 0.00001600  |
| H | 0.06873800  | 3.12800000  | -0.00010400 |
| H | -2.37480000 | 2.66300300  | -0.00003000 |
| H | 2.43582700  | 2.22838700  | -0.00009600 |
| H | -3.67331000 | -1.45919800 | -0.88949400 |
| H | -3.67323600 | -1.45915500 | 0.88967900  |
| H | -5.99030000 | -1.74092700 | 0.00018900  |
| H | -5.84576100 | -0.21433500 | 0.88823200  |
| H | -5.84583200 | -0.21436900 | -0.88792400 |

**\* GS of F4 at M06-2X/6-311++G(d,p)**

|   |             |             |             |
|---|-------------|-------------|-------------|
| O | 0.96761200  | -1.32625100 | 0.00007100  |
| O | -3.45553700 | 0.39967000  | 0.00001400  |
| O | 2.98330900  | -2.22320400 | 0.00002300  |
| N | 5.42751800  | 0.38605400  | -0.00038200 |
| C | 0.62380700  | 1.05153400  | 0.00000300  |
| C | 0.12510800  | -0.25572400 | 0.00003700  |
| C | -2.12402600 | 0.53693700  | 0.00001300  |
| C | -1.23425000 | -0.53561100 | 0.00004000  |
| C | -0.30221700 | 2.11605100  | -0.00002500 |
| C | -1.64934400 | 1.86839200  | -0.00002000 |
| C | 2.03485000  | 1.22786100  | -0.00001600 |

|   |             |             |             |
|---|-------------|-------------|-------------|
| C | 2.86056600  | 0.14760300  | 0.00001600  |
| C | -4.01486100 | -0.92087100 | 0.00005800  |
| C | 2.32920200  | -1.21537600 | 0.00010500  |
| C | -5.51832000 | -0.77287400 | 0.00006500  |
| C | 4.28162900  | 0.27880300  | -0.00001600 |
| H | -1.55509100 | -1.56722200 | 0.00006500  |
| H | 0.06990300  | 3.13376100  | -0.00005400 |
| H | -2.37410700 | 2.67198700  | -0.00004200 |
| H | 2.44699700  | 2.23108100  | -0.00006100 |
| H | -3.66752600 | -1.45359200 | -0.88986100 |
| H | -3.66751300 | -1.45353800 | 0.89000500  |
| H | -5.98126300 | -1.76053900 | 0.00009500  |
| H | -5.84997800 | -0.23316900 | 0.88793900  |
| H | -5.84999000 | -0.23321800 | -0.88783500 |

**\* GS of F4 at PBE/6-311++G(d,p)**

|   |             |             |             |
|---|-------------|-------------|-------------|
| O | 0.97348700  | -1.34528400 | 0.00004900  |
| O | -3.47989100 | 0.40947600  | 0.00002900  |
| O | 3.01761000  | -2.25492400 | -0.00003700 |
| N | 5.46403800  | 0.41881800  | -0.00010800 |
| C | 0.63413600  | 1.05674900  | -0.00001800 |
| C | 0.12558300  | -0.26645100 | 0.00002000  |
| C | -2.13801800 | 0.53987400  | 0.00001600  |
| C | -1.24027300 | -0.54200600 | 0.00003500  |
| C | -0.30152700 | 2.12699900  | -0.00004000 |
| C | -1.65742100 | 1.87879000  | -0.00002200 |
| C | 2.03897700  | 1.23271000  | -0.00004900 |
| C | 2.88828300  | 0.14080200  | -0.00003100 |
| C | -4.05967400 | -0.92623000 | 0.00006700  |
| C | 2.36770400  | -1.22442100 | 0.00007800  |
| C | -5.56568100 | -0.76918300 | 0.00008000  |
| C | 4.30089900  | 0.29140300  | -0.00010800 |
| H | -1.57112100 | -1.57933200 | 0.00006300  |
| H | 0.07188400  | 3.15321600  | -0.00007300 |
| H | -2.38444200 | 2.69214200  | -0.00003800 |
| H | 2.45345300  | 2.24368700  | -0.00010400 |
| H | -3.70937800 | -1.46345800 | -0.89697400 |
| H | -3.70935800 | -1.46341500 | 0.89712600  |
| H | -6.03299000 | -1.76508300 | 0.00010800  |
| H | -5.90693200 | -0.22890400 | 0.89499500  |

|   |             |             |             |
|---|-------------|-------------|-------------|
| H | -5.90695100 | -0.22894400 | -0.89485100 |
|---|-------------|-------------|-------------|

**\* GS of F4 at PW6B95D3/6-311++G(d,p)**

|   |             |             |             |
|---|-------------|-------------|-------------|
| O | 0.96515000  | -1.32261200 | 0.00007100  |
| O | -3.44530400 | 0.40148900  | 0.00000100  |
| O | 2.97731100  | -2.22548600 | -0.00001000 |
| N | 5.41161000  | 0.39442900  | -0.00031500 |
| C | 0.62469500  | 1.04925600  | 0.00000500  |
| C | 0.12377300  | -0.25673600 | 0.00003400  |
| C | -2.11781600 | 0.53920900  | 0.00000500  |
| C | -1.23011800 | -0.53154000 | 0.00003200  |
| C | -0.29938800 | 2.11097900  | -0.00002500 |
| C | -1.64284700 | 1.86540200  | -0.00002400 |
| C | 2.02465900  | 1.22151900  | -0.00001500 |
| C | 2.85526700  | 0.14126200  | 0.00001400  |
| C | -4.00769700 | -0.91800000 | 0.00005700  |
| C | 2.32855600  | -1.21212000 | 0.00012400  |
| C | -5.50493100 | -0.77329400 | 0.00007500  |
| C | 4.26533900  | 0.27906200  | -0.00004200 |
| H | -1.55549500 | -1.55764500 | 0.00005200  |
| H | 0.07084900  | 3.12516000  | -0.00005300 |
| H | -2.36290800 | 2.66822700  | -0.00004600 |
| H | 2.43630900  | 2.22023300  | -0.00006700 |
| H | -3.65921500 | -1.44928000 | -0.88595100 |
| H | -3.65918700 | -1.44921700 | 0.88609100  |
| H | -5.96330900 | -1.75974100 | 0.00011100  |
| H | -5.84125500 | -0.23790200 | 0.88489300  |
| H | -5.84128100 | -0.23795500 | -0.88476500 |

**\* GS of F4 at WB97XD/6-311++G(d,p)**

|   |             |             |             |
|---|-------------|-------------|-------------|
| O | 0.96916800  | -1.32758600 | 0.00014200  |
| O | -3.45064900 | 0.39864400  | 0.00000200  |
| O | 2.98166800  | -2.22948300 | -0.00000600 |
| N | 5.42614700  | 0.40156800  | -0.00069600 |
| C | 0.62674800  | 1.04798700  | 0.00004900  |
| C | 0.12785600  | -0.25843600 | 0.00008000  |
| C | -2.12114700 | 0.53339300  | 0.00002000  |
| C | -1.23070700 | -0.53709300 | 0.00006100  |
| C | -0.29988600 | 2.11127900  | 0.00000200  |
| C | -1.64575300 | 1.86371300  | -0.00001000 |

|   |             |             |             |
|---|-------------|-------------|-------------|
| C | 2.03489500  | 1.22340900  | 0.00002300  |
| C | 2.86232600  | 0.14285100  | 0.00007000  |
| C | -4.02348900 | -0.91619700 | 0.00004100  |
| C | 2.33077600  | -1.21669500 | 0.00025500  |
| C | -5.52556400 | -0.76037700 | 0.00002700  |
| C | 4.27995200  | 0.28229100  | -0.00001300 |
| H | -1.55381800 | -1.56806500 | 0.00008400  |
| H | 0.06934700  | 3.13022200  | -0.00003100 |
| H | -2.36755700 | 2.67035300  | -0.00004700 |
| H | 2.44691300  | 2.22647900  | -0.00005600 |
| H | -3.68243500 | -1.45443200 | -0.89000100 |
| H | -3.68244500 | -1.45437600 | 0.89012000  |
| H | -5.99104600 | -1.74819000 | 0.00005300  |
| H | -5.85977000 | -0.22113500 | 0.88859000  |
| H | -5.85975900 | -0.22118700 | -0.88857100 |

**\* ES of F4 at PBE0/6-311++G(d,p)**

|   |             |             |             |
|---|-------------|-------------|-------------|
| O | 0.96629100  | -1.34009100 | -0.00065300 |
| O | -3.44542200 | 0.38374800  | 0.00019600  |
| O | 2.98118100  | -2.23098800 | -0.00014900 |
| N | 5.42669900  | 0.37915100  | 0.00068700  |
| C | 0.64238000  | 1.07736900  | -0.00022500 |
| C | 0.13053900  | -0.26584700 | -0.00030900 |
| C | -2.12741800 | 0.52308300  | 0.00005100  |
| C | -1.21596300 | -0.54323300 | -0.00014900 |
| C | -0.31379100 | 2.12975000  | -0.00003600 |
| C | -1.65653500 | 1.86798000  | 0.00008500  |
| C | 2.03226300  | 1.28471000  | -0.00025800 |
| C | 2.87389900  | 0.13742000  | -0.00011800 |
| C | -4.03190000 | -0.92802700 | 0.00025200  |
| C | 2.34427200  | -1.19850600 | -0.00032100 |
| C | -5.52790300 | -0.76280200 | 0.00050100  |
| C | 4.27016200  | 0.25247300  | 0.00022500  |
| H | -1.53619100 | -1.57670900 | -0.00022700 |
| H | 0.04303700  | 3.15339200  | 0.00001800  |
| H | -2.38924300 | 2.66664800  | 0.00022100  |
| H | 2.45015600  | 2.28182600  | -0.00021100 |
| H | -3.68554100 | -1.46423600 | -0.89000400 |
| H | -3.68524400 | -1.46429400 | 0.89035800  |
| H | -5.99608300 | -1.75002000 | 0.00051900  |

|   |             |             |             |
|---|-------------|-------------|-------------|
| H | -5.86196600 | -0.22416600 | 0.88993800  |
| H | -5.86224900 | -0.22406500 | -0.88877000 |

**\* ES of F4 at APFD/6-311++G(d,p)**

|   |             |             |             |
|---|-------------|-------------|-------------|
| O | 0.96834600  | -1.34740800 | -0.00040600 |
| O | -3.44926200 | 0.38223500  | 0.00018600  |
| O | 2.99704900  | -2.22749100 | -0.00011800 |
| N | 5.43067100  | 0.38833900  | -0.00025700 |
| C | 0.64157800  | 1.07531700  | -0.00009900 |
| C | 0.13230500  | -0.27094300 | -0.00016900 |
| C | -2.12829900 | 0.51504200  | 0.00008700  |
| C | -1.21378600 | -0.55181200 | -0.00005900 |
| C | -0.31496500 | 2.12615800  | 0.00003500  |
| C | -1.65900500 | 1.86129200  | 0.00011800  |
| C | 2.03224500  | 1.28577400  | -0.00012400 |
| C | 2.87711200  | 0.14120100  | -0.00000800 |
| C | -4.04346800 | -0.92774500 | 0.00021400  |
| C | 2.35187400  | -1.19874600 | -0.00012300 |
| C | -5.54075800 | -0.75016800 | 0.00037400  |
| C | 4.27351600  | 0.26027000  | 0.00023200  |
| H | -1.53166200 | -1.58629900 | -0.00011600 |
| H | 0.04112200  | 3.15047500  | 0.00007700  |
| H | -2.39389600 | 2.65855800  | 0.00021500  |
| H | 2.44773500  | 2.28421600  | -0.00010800 |
| H | -3.69821400 | -1.46513300 | -0.89002600 |
| H | -3.69802600 | -1.46517900 | 0.89035400  |
| H | -6.02018800 | -1.73227100 | 0.00038900  |
| H | -5.87026800 | -0.20767200 | 0.88947900  |
| H | -5.87044900 | -0.20761300 | -0.88862800 |

**\* ES of F4 at B3LYP/6-311++G(d,p)**

|   |             |             |             |
|---|-------------|-------------|-------------|
| O | 0.97491000  | -1.35050200 | -0.00044200 |
| O | -3.45985500 | 0.38419900  | 0.00021600  |
| O | 3.00309100  | -2.24315000 | -0.00029100 |
| N | 5.44668800  | 0.40027200  | 0.00066400  |
| C | 0.64595800  | 1.07541100  | -0.00015800 |
| C | 0.13107200  | -0.26945400 | -0.00020500 |
| C | -2.13243800 | 0.52109600  | 0.00009100  |
| C | -1.21904000 | -0.54802800 | -0.00007200 |
| C | -0.31110200 | 2.13046400  | 0.00000300  |

|   |             |             |             |
|---|-------------|-------------|-------------|
| C | -1.65857600 | 1.86907700  | 0.00011600  |
| C | 2.04243200  | 1.28173500  | -0.00025000 |
| C | 2.89177800  | 0.13537100  | -0.00019900 |
| C | -4.06837900 | -0.93371700 | 0.00024300  |
| C | 2.36552700  | -1.20574000 | -0.00025300 |
| C | -5.56932700 | -0.74696400 | 0.00041800  |
| C | 4.29055500  | 0.26250400  | -0.00009100 |
| H | -1.53982200 | -1.57968900 | -0.00011600 |
| H | 0.04475300  | 3.15325200  | 0.00003200  |
| H | -2.38881900 | 2.66831500  | 0.00022900  |
| H | 2.45838900  | 2.27826900  | -0.00026500 |
| H | -3.72765200 | -1.47029100 | -0.89000900 |
| H | -3.72745000 | -1.47034700 | 0.89038400  |
| H | -6.04992100 | -1.72805100 | 0.00043500  |
| H | -5.89601800 | -0.20416200 | 0.88952400  |
| H | -5.89621500 | -0.20409700 | -0.88857700 |

**\* ES of F4 at BP86/6-311++G(d,p)**

|   |             |             |             |
|---|-------------|-------------|-------------|
| O | 0.97253500  | -1.35665300 | -0.00035500 |
| O | -3.49202100 | 0.39782600  | 0.00009400  |
| O | 3.01851100  | -2.25845900 | -0.00030400 |
| N | 5.48376900  | 0.39185800  | -0.00010500 |
| C | 0.64471800  | 1.07959500  | 0.00003100  |
| C | 0.13060900  | -0.26251900 | -0.00013100 |
| C | -2.14313700 | 0.52738400  | 0.00004500  |
| C | -1.23418300 | -0.54656700 | -0.00011300 |
| C | -0.30244000 | 2.13491400  | 0.00006000  |
| C | -1.67093600 | 1.87691400  | 0.00008100  |
| C | 2.06479700  | 1.28974300  | -0.00002700 |
| C | 2.90838100  | 0.14075700  | 0.00001400  |
| C | -4.08912800 | -0.93039900 | 0.00022600  |
| C | 2.38058500  | -1.20776200 | -0.00001200 |
| C | -5.59558200 | -0.76471200 | 0.00040600  |
| C | 4.31329300  | 0.25997700  | 0.00002200  |
| H | -1.55601300 | -1.58753400 | -0.00023200 |
| H | 0.05555700  | 3.16653900  | 0.00006300  |
| H | -2.40232600 | 2.68697200  | 0.00010600  |
| H | 2.48177200  | 2.29538300  | -0.00005500 |
| H | -3.73317500 | -1.46980700 | -0.89575300 |
| H | -3.73294400 | -1.46973800 | 0.89615400  |



|   |             |             |             |
|---|-------------|-------------|-------------|
| H | -6.06333500 | -1.76111500 | 0.00053000  |
| H | -5.93486600 | -0.22462900 | 0.89660300  |
| H | -5.93509900 | -0.22474100 | -0.89577000 |

**\* ES of F4 at CAM-B3LYP/6-311++G(d,p)**

|   |             |             |             |
|---|-------------|-------------|-------------|
| O | 0.96883100  | -1.34650100 | -0.00049500 |
| O | -3.43983800 | 0.38060000  | 0.00020000  |
| O | 2.98894100  | -2.22998200 | -0.00003700 |
| N | 5.42050800  | 0.39208500  | -0.00009400 |
| C | 0.64500500  | 1.07439500  | -0.00014800 |
| C | 0.12841700  | -0.27180600 | -0.00021100 |
| C | -2.12404300 | 0.52236500  | 0.00007900  |
| C | -1.21237900 | -0.54515200 | -0.00007700 |
| C | -0.31960200 | 2.13101600  | 0.00000200  |
| C | -1.65285200 | 1.86862100  | 0.00010200  |
| C | 2.02408900  | 1.28079100  | -0.00013900 |
| C | 2.87296000  | 0.13515600  | -0.00003300 |
| C | -4.03672000 | -0.93372600 | 0.00023200  |
| C | 2.34979300  | -1.20156600 | -0.00028900 |
| C | -5.53299000 | -0.75349100 | 0.00041000  |
| C | 4.27118500  | 0.25975600  | 0.00032700  |
| H | -1.53440200 | -1.57588200 | -0.00013100 |
| H | 0.03884300  | 3.15230300  | 0.00004600  |
| H | -2.38738600 | 2.66326000  | 0.00021500  |
| H | 2.44092300  | 2.27650100  | -0.00006200 |
| H | -3.69576800 | -1.46805700 | -0.88958400 |
| H | -3.69555900 | -1.46810800 | 0.88993800  |
| H | -6.01202700 | -1.73389700 | 0.00042700  |
| H | -5.85931500 | -0.21093300 | 0.88844900  |
| H | -5.85951700 | -0.21086600 | -0.88751300 |

**\* ES of F4 at M06/6-311++G(d,p)**

|   |             |             |             |
|---|-------------|-------------|-------------|
| O | 0.96752200  | -1.34054800 | -0.00049400 |
| O | -3.44336800 | 0.38131100  | 0.00020400  |
| O | 2.98660800  | -2.22556700 | -0.00015400 |
| N | 5.42123500  | 0.38406100  | 0.00024500  |
| C | 0.63998800  | 1.07400800  | -0.00015900 |
| C | 0.12929800  | -0.26813800 | -0.00022300 |
| C | -2.12648800 | 0.52000700  | 0.00007800  |
| C | -1.21492700 | -0.54460700 | -0.00008900 |

|   |             |             |             |
|---|-------------|-------------|-------------|
| C | -0.31625000 | 2.12579700  | 0.00000000  |
| C | -1.65520200 | 1.86365700  | 0.00010500  |
| C | 2.02595600  | 1.28261200  | -0.00019000 |
| C | 2.86977600  | 0.13901400  | -0.00008500 |
| C | -4.03059700 | -0.92946600 | 0.00023700  |
| C | 2.34613000  | -1.20000300 | -0.00026200 |
| C | -5.52129100 | -0.75723900 | 0.00042300  |
| C | 4.26560500  | 0.25788300  | 0.00018500  |
| H | -1.53245800 | -1.58001700 | -0.00014400 |
| H | 0.04450600  | 3.14900000  | 0.00004100  |
| H | -2.39134700 | 2.65998300  | 0.00022100  |
| H | 2.44089700  | 2.28209400  | -0.00015300 |
| H | -3.68220200 | -1.46887200 | -0.88975800 |
| H | -3.68198100 | -1.46892500 | 0.89011300  |
| H | -6.00248400 | -1.73817300 | 0.00044000  |
| H | -5.85072900 | -0.21315000 | 0.88920200  |
| H | -5.85094000 | -0.21307900 | -0.88823500 |

**\* ES of F4 at M06-2X/6-311++G(d,p)**

|   |             |             |             |
|---|-------------|-------------|-------------|
| O | 0.96307000  | -1.34690100 | -0.00048400 |
| O | -3.44212600 | 0.38343900  | 0.00021600  |
| O | 2.98382300  | -2.22743200 | -0.00024700 |
| N | 5.42447400  | 0.37694500  | 0.00035300  |
| C | 0.64249900  | 1.07921000  | -0.00014700 |
| C | 0.12688000  | -0.27184800 | -0.00020500 |
| C | -2.12901800 | 0.52636900  | 0.00009500  |
| C | -1.21663600 | -0.54600300 | -0.00006700 |
| C | -0.32203600 | 2.13890100  | 0.00000200  |
| C | -1.65812000 | 1.87714500  | 0.00011300  |
| C | 2.02426800  | 1.28888200  | -0.00021300 |
| C | 2.86938700  | 0.13943900  | -0.00010600 |
| C | -4.02137200 | -0.93612100 | 0.00023300  |
| C | 2.34535900  | -1.20142500 | -0.00018000 |
| C | -5.52137500 | -0.76827300 | 0.00040600  |
| C | 4.27255500  | 0.25520200  | 0.00008000  |
| H | -1.53730400 | -1.57821700 | -0.00012100 |
| H | 0.03998600  | 3.15949500  | 0.00002700  |
| H | -2.39526200 | 2.67005100  | 0.00022100  |
| H | 2.44184500  | 2.28533000  | -0.00023200 |
| H | -3.67359600 | -1.46542700 | -0.89085900 |

|   |             |             |             |
|---|-------------|-------------|-------------|
| H | -3.67339400 | -1.46549200 | 0.89120700  |
| H | -5.99178500 | -1.75229500 | 0.00041600  |
| H | -5.84705200 | -0.22692900 | 0.88909900  |
| H | -5.84724700 | -0.22685400 | -0.88816900 |

**\* ES of F4 at PBE/6-311++G(d,p)**

|   |             |             |             |
|---|-------------|-------------|-------------|
| O | 0.97103200  | -1.35375500 | -0.00050200 |
| O | -3.48731800 | 0.39674300  | 0.00009300  |
| O | 3.01342000  | -2.25469700 | -0.00048200 |
| N | 5.47647400  | 0.38861900  | 0.00116300  |
| C | 0.64357700  | 1.07873900  | -0.00010200 |
| C | 0.13096300  | -0.26151400 | -0.00026400 |
| C | -2.14055400 | 0.52668300  | -0.00001400 |
| C | -1.23233700 | -0.54549300 | -0.00020200 |
| C | -0.30270100 | 2.13232500  | 0.00002900  |
| C | -1.66941700 | 1.87431800  | 0.00006600  |
| C | 2.06160400  | 1.28898400  | -0.00018200 |
| C | 2.90324900  | 0.14101000  | -0.00015800 |
| C | -4.08099700 | -0.92753000 | 0.00030200  |
| C | 2.37475100  | -1.20512300 | -0.00026600 |
| C | -5.58476000 | -0.76598300 | 0.00051900  |
| C | 4.30619800  | 0.25867300  | -0.00025000 |
| H | -1.55327000 | -1.58632500 | -0.00031100 |
| H | 0.05526000  | 3.16346100  | 0.00007000  |
| H | -2.40094300 | 2.68364000  | 0.00014600  |
| H | 2.47858300  | 2.29411600  | -0.00010700 |
| H | -3.72453600 | -1.46789100 | -0.89456900 |
| H | -3.72424800 | -1.46772300 | 0.89515900  |
| H | -6.05020100 | -1.76255100 | 0.00072800  |
| H | -5.92510100 | -0.22683500 | 0.89603600  |
| H | -5.92539000 | -0.22707800 | -0.89503400 |

**\* ES of F4 at PW6B95D3/6-311++G(d,p)**

|   |             |             |             |
|---|-------------|-------------|-------------|
| O | 0.96178800  | -1.33875700 | -0.00043200 |
| O | -3.43922500 | 0.38648500  | 0.00020900  |
| O | 2.97664800  | -2.22682400 | -0.00022200 |
| N | 5.41352300  | 0.37579700  | 0.00030100  |
| C | 0.64027600  | 1.07558500  | -0.00014000 |
| C | 0.12715800  | -0.26382900 | -0.00018900 |
| C | -2.12262900 | 0.52804900  | 0.00009400  |

|   |             |             |             |
|---|-------------|-------------|-------------|
| C | -1.21549400 | -0.53824800 | -0.00006100 |
| C | -0.31296200 | 2.12811500  | 0.00000900  |
| C | -1.65173700 | 1.86943600  | 0.00011500  |
| C | 2.02616200  | 1.28137300  | -0.00021300 |
| C | 2.86601700  | 0.13637000  | -0.00011900 |
| C | -4.01892200 | -0.93021500 | 0.00022800  |
| C | 2.33949400  | -1.19658300 | -0.00018600 |
| C | -5.51333600 | -0.76993100 | 0.00039400  |
| C | 4.26043900  | 0.25062700  | 0.00004800  |
| H | -1.53647100 | -1.56626500 | -0.00010700 |
| H | 0.04529400  | 3.14591200  | 0.00003800  |
| H | -2.38116300 | 2.66421200  | 0.00022100  |
| H | 2.44245900  | 2.27367000  | -0.00022700 |
| H | -3.66901400 | -1.45945700 | -0.88634100 |
| H | -3.66882000 | -1.45951600 | 0.88668600  |
| H | -5.97701900 | -1.75383600 | 0.00040400  |
| H | -5.84511400 | -0.23354900 | 0.88598900  |
| H | -5.84530100 | -0.23347900 | -0.88509000 |

**\* ES of F4 at WB97XD/6-311++G(d,p)**

|   |             |             |             |
|---|-------------|-------------|-------------|
| O | 0.96578900  | -1.34628200 | -0.00052200 |
| O | -3.44007900 | 0.38273500  | 0.00020900  |
| O | 2.98324200  | -2.23216700 | -0.00017300 |
| N | 5.42399500  | 0.38775200  | 0.00035100  |
| C | 0.64549600  | 1.07707700  | -0.00016800 |
| C | 0.12948600  | -0.27243400 | -0.00023200 |
| C | -2.12599600 | 0.52335000  | 0.00007800  |
| C | -1.21370600 | -0.54573500 | -0.00009000 |
| C | -0.32003200 | 2.13489600  | -0.00001100 |
| C | -1.65487400 | 1.87173600  | 0.00010000  |
| C | 2.02532200  | 1.28545000  | -0.00019700 |
| C | 2.87211600  | 0.13535300  | -0.00010100 |
| C | -4.02997600 | -0.93188900 | 0.00024000  |
| C | 2.34570600  | -1.20271700 | -0.00028300 |
| C | -5.52894900 | -0.75912300 | 0.00043500  |
| C | 4.27142100  | 0.25682600  | 0.00017700  |
| H | -1.53570700 | -1.57752500 | -0.00014600 |
| H | 0.03848200  | 3.15689200  | 0.00002600  |
| H | -2.38896600 | 2.66768200  | 0.00021800  |
| H | 2.44316500  | 2.28174400  | -0.00016000 |

|   |             |             |             |
|---|-------------|-------------|-------------|
| H | -3.68811000 | -1.46649700 | -0.89084200 |
| H | -3.68788100 | -1.46655600 | 0.89119800  |
| H | -6.00049600 | -1.74393100 | 0.00045200  |
| H | -5.85796700 | -0.21858900 | 0.88974500  |
| H | -5.85818800 | -0.21851600 | -0.88874900 |

**S3-F5. The coordinates of the optimized structures for the GS and ES of F5 compound**

**\* GS of F5 at PBE0/6-311++G(d,p)**

|   |             |             |             |
|---|-------------|-------------|-------------|
| O | -0.39588300 | 1.43174400  | -0.00010400 |
| O | 4.24234600  | 0.50032400  | 0.00014800  |
| O | -2.53319500 | 1.98265200  | -0.00025200 |
| N | -4.49726800 | -1.01629600 | 0.00006500  |
| C | 0.34148400  | -0.85521500 | 0.00004900  |
| C | 0.61219100  | 0.52301000  | -0.00001300 |
| C | 1.43297800  | -1.74605900 | 0.00014000  |
| C | -1.01255000 | -1.26297300 | 0.00001200  |
| C | 1.90412300  | 1.01686900  | 0.00001700  |
| C | 2.95978300  | 0.10937200  | 0.00011100  |
| C | 2.72237900  | -1.27756700 | 0.00017100  |
| C | -2.01507400 | -0.33476800 | -0.00008800 |
| C | -1.72241100 | 1.09178000  | -0.00014100 |
| C | -3.38348900 | -0.70854800 | -0.00014800 |
| H | 1.23995300  | -2.81339200 | 0.00018700  |
| H | -1.25181800 | -2.32165600 | 0.00005500  |
| H | 2.07307500  | 2.08796000  | -0.00003500 |
| H | 3.56910800  | -1.95341100 | 0.00024200  |
| H | 4.30793900  | 1.46139100  | 0.00010900  |

**\* GS of F5 at APFD/6-311++G(d,p)**

|   |             |             |             |
|---|-------------|-------------|-------------|
| O | -0.39498100 | 1.43917000  | -0.00005000 |
| O | 4.24819400  | 0.49615900  | 0.00003900  |
| O | -2.54321300 | 1.97900800  | -0.00003000 |
| N | -4.49830400 | -1.01868300 | -0.00081700 |
| C | 0.34241900  | -0.85555700 | 0.00011800  |
| C | 0.61238500  | 0.52596600  | 0.00002300  |
| C | 1.43386800  | -1.74659200 | 0.00018800  |
| C | -1.01133700 | -1.26441400 | 0.00014200  |
| C | 1.90399800  | 1.02081600  | -0.00000600 |
| C | 2.96151000  | 0.11134600  | 0.00006000  |
| C | 2.72406400  | -1.27662200 | 0.00015500  |

|   |             |             |             |
|---|-------------|-------------|-------------|
| C | -2.01536900 | -0.33675600 | 0.00009100  |
| C | -1.72566900 | 1.09277000  | -0.00006300 |
| C | -3.38355500 | -0.71161300 | 0.00020200  |
| H | 1.24006500  | -2.81418400 | 0.00026300  |
| H | -1.24989200 | -2.32357800 | 0.00023300  |
| H | 2.07177100  | 2.09248700  | -0.00008200 |
| H | 3.57190800  | -1.95184700 | 0.00020300  |
| H | 4.32039000  | 1.45715200  | -0.00002200 |

**\* GS of F5 at B3LYP/6-311++G(d,p)**

|   |             |             |             |
|---|-------------|-------------|-------------|
| O | -0.39741600 | 1.44171000  | -0.00012400 |
| O | 4.26275400  | 0.49728800  | 0.00018600  |
| O | -2.54668300 | 1.99272600  | -0.00033600 |
| N | -4.50796100 | -1.02979800 | 0.00037900  |
| C | 0.34201500  | -0.85508500 | 0.00002700  |
| C | 0.61822100  | 0.52657400  | -0.00002500 |
| C | 1.43572000  | -1.75044000 | 0.00012600  |
| C | -1.01605600 | -1.26146900 | -0.00003400 |
| C | 1.91377800  | 1.01944300  | 0.00002400  |
| C | 2.96940100  | 0.10680300  | 0.00012900  |
| C | 2.72914500  | -1.28286100 | 0.00017900  |
| C | -2.02499100 | -0.33427400 | -0.00015200 |
| C | -1.73501800 | 1.09739900  | -0.00016100 |
| C | -3.39488400 | -0.71594700 | -0.00027900 |
| H | 1.24210600  | -2.81642200 | 0.00016300  |
| H | -1.25392400 | -2.31911300 | -0.00000800 |
| H | 2.08598300  | 2.08881600  | -0.00001800 |
| H | 3.57335100  | -1.96008200 | 0.00025700  |
| H | 4.33497900  | 1.46072600  | 0.00015000  |

**\* GS of F5 at BP86/6-311++G(d,p)**

|   |             |             |             |
|---|-------------|-------------|-------------|
| O | -0.39696100 | 1.45619300  | -0.00007100 |
| O | 4.28673200  | 0.49783300  | 0.00008400  |
| O | -2.56870600 | 2.00623700  | -0.00014500 |
| N | -4.53137700 | -1.04320000 | -0.00043900 |
| C | 0.34315700  | -0.86007600 | 0.00009300  |
| C | 0.62149700  | 0.53300200  | 0.00000800  |
| C | 1.44418700  | -1.75958700 | 0.00017200  |
| C | -1.01533700 | -1.27035600 | 0.00008900  |
| C | 1.92407400  | 1.02763800  | 0.00000200  |

|   |             |             |             |
|---|-------------|-------------|-------------|
| C | 2.98612400  | 0.10828100  | 0.00008200  |
| C | 2.74458400  | -1.28964400 | 0.00016600  |
| C | -2.03623700 | -0.33620500 | 0.00001700  |
| C | -1.75366400 | 1.10033500  | -0.00008000 |
| C | -3.40584500 | -0.72241100 | 0.00004100  |
| H | 1.24810300  | -2.83423000 | 0.00023600  |
| H | -1.25472500 | -2.33686300 | 0.00015600  |
| H | 2.09807000  | 2.10584000  | -0.00006500 |
| H | 3.59584700  | -1.97230700 | 0.00022400  |
| H | 4.34859900  | 1.47199300  | 0.00002800  |

**\* GS of F5 at CAM-B3LYP/6-311++G(d,p)**

|   |             |             |             |
|---|-------------|-------------|-------------|
| O | -0.39579200 | 1.43323400  | -0.00010600 |
| O | 4.24542800  | 0.49717700  | 0.00015000  |
| O | -2.53307500 | 1.98084300  | -0.00026700 |
| N | -4.49535400 | -1.01623100 | 0.00009200  |
| C | 0.34262000  | -0.85118300 | 0.00004900  |
| C | 0.61579100  | 0.52035300  | -0.00001300 |
| C | 1.43037300  | -1.74341200 | 0.00014200  |
| C | -1.01720700 | -1.25776600 | 0.00001000  |
| C | 1.90704900  | 1.01392800  | 0.00001700  |
| C | 2.95695300  | 0.10646400  | 0.00011200  |
| C | 2.71876200  | -1.27774400 | 0.00017300  |
| C | -2.01393500 | -0.33501900 | -0.00009100 |
| C | -1.72051600 | 1.09378800  | -0.00013500 |
| C | -3.38763100 | -0.70960700 | -0.00016600 |
| H | 1.23628800  | -2.80886800 | 0.00018800  |
| H | -1.25512900 | -2.31503100 | 0.00005100  |
| H | 2.07674300  | 2.08312600  | -0.00003500 |
| H | 3.56355800  | -1.95329200 | 0.00024500  |
| H | 4.31997700  | 1.45883800  | 0.00010900  |

**\* GS of F5 at M06/6-311++G(d,p)**

|   |             |             |             |
|---|-------------|-------------|-------------|
| O | -0.39628000 | 1.43179000  | -0.00010500 |
| O | 4.23888500  | 0.49691100  | 0.00015100  |
| O | -2.53578300 | 1.97812800  | -0.00025900 |
| N | -4.49292400 | -1.01851300 | 0.00009500  |
| C | 0.34287700  | -0.85115100 | 0.00004700  |
| C | 0.61338100  | 0.52504500  | -0.00001400 |
| C | 1.43148300  | -1.74250900 | 0.00013900  |

|   |             |             |             |
|---|-------------|-------------|-------------|
| C | -1.00966900 | -1.25878700 | 0.00000700  |
| C | 1.90424600  | 1.01596800  | 0.00001800  |
| C | 2.95705200  | 0.10854300  | 0.00011200  |
| C | 2.71909100  | -1.27638800 | 0.00017200  |
| C | -2.01194400 | -0.33435700 | -0.00009400 |
| C | -1.72420800 | 1.09173500  | -0.00013900 |
| C | -3.38004600 | -0.71013200 | -0.00016700 |
| H | 1.23310400  | -2.80973900 | 0.00018400  |
| H | -1.24637200 | -2.31939400 | 0.00004700  |
| H | 2.07513900  | 2.08759200  | -0.00003300 |
| H | 3.56837900  | -1.95011600 | 0.00024300  |
| H | 4.31205600  | 1.45882600  | 0.00010900  |

**\* GS of F5 at M06-2X/6-311++G(d,p)**

|   |             |             |             |
|---|-------------|-------------|-------------|
| O | -0.39630900 | 1.43373000  | -0.00013800 |
| O | 4.24729800  | 0.50137100  | 0.00022400  |
| O | -2.53485000 | 1.97560300  | -0.00041300 |
| N | -4.50410500 | -1.00483800 | 0.00071700  |
| C | 0.34450400  | -0.85454100 | 0.00000000  |
| C | 0.61389500  | 0.52060500  | -0.00003600 |
| C | 1.43442700  | -1.74708900 | 0.00010500  |
| C | -1.01813800 | -1.26625800 | -0.00008600 |
| C | 1.90700100  | 1.01781700  | 0.00003400  |
| C | 2.96039900  | 0.10962500  | 0.00014600  |
| C | 2.72482900  | -1.27829800 | 0.00018100  |
| C | -2.01288600 | -0.34030000 | -0.00022100 |
| C | -1.71957100 | 1.09387000  | -0.00018400 |
| C | -3.39233400 | -0.70795600 | -0.00042800 |
| H | 1.23923200  | -2.81290700 | 0.00012900  |
| H | -1.25644500 | -2.32438100 | -0.00008100 |
| H | 2.07382700  | 2.08801900  | 0.00000300  |
| H | 3.57275200  | -1.95047000 | 0.00026500  |
| H | 4.31749700  | 1.46312900  | 0.00020000  |

**\* GS of F5 at PBE/6-311++G(d,p)**

|   |             |             |             |
|---|-------------|-------------|-------------|
| O | -0.39635600 | 1.45317900  | -0.00008000 |
| O | 4.28025300  | 0.49825400  | 0.00012600  |
| O | -2.56483100 | 2.00344400  | -0.00027400 |
| N | -4.52658700 | -1.04025800 | -0.00003600 |
| C | 0.34278700  | -0.85963600 | 0.00006900  |



|   |             |             |             |
|---|-------------|-------------|-------------|
| C | 0.61977700  | 0.53205500  | -0.00000100 |
| C | 1.44266600  | -1.75748100 | 0.00015200  |
| C | -1.01383100 | -1.26960500 | 0.00003200  |
| C | 1.92105900  | 1.02595700  | 0.00001300  |
| C | 2.98266900  | 0.10865300  | 0.00010200  |
| C | 2.74142600  | -1.28772400 | 0.00017000  |
| C | -2.03320900 | -0.33603200 | -0.00006200 |
| C | -1.75007800 | 1.09849000  | -0.00006900 |
| C | -3.40115800 | -0.72057700 | -0.00014900 |
| H | 1.24657200  | -2.83168700 | 0.00020000  |
| H | -1.25314000 | -2.33575100 | 0.00006200  |
| H | 2.09446500  | 2.10390400  | -0.00004300 |
| H | 3.59265300  | -1.96976500 | 0.00023400  |
| H | 4.34038600  | 1.47149400  | 0.00007700  |

**\* GS of F5 at PW6B95D3/6-311++G(d,p)**

|   |             |             |             |
|---|-------------|-------------|-------------|
| O | -0.39581500 | 1.42902000  | -0.00012100 |
| O | 4.23619900  | 0.50114800  | 0.00018800  |
| O | -2.53208200 | 1.97603900  | -0.00034600 |
| N | -4.48873400 | -1.01132100 | 0.00042000  |
| C | 0.34207600  | -0.85349500 | 0.00002400  |
| C | 0.61264400  | 0.52029300  | -0.00002500 |
| C | 1.43094100  | -1.74217300 | 0.00012300  |
| C | -1.01020900 | -1.26030800 | -0.00004100 |
| C | 1.90072100  | 1.01441600  | 0.00002500  |
| C | 2.95278700  | 0.10910200  | 0.00013000  |
| C | 2.71723800  | -1.27420500 | 0.00017800  |
| C | -2.00998000 | -0.33577600 | -0.00016000 |
| C | -1.72017000 | 1.08879100  | -0.00015400 |
| C | -3.37743100 | -0.70765800 | -0.00030600 |
| H | 1.23842400  | -2.80452500 | 0.00015700  |
| H | -1.24752800 | -2.31430100 | -0.00002200 |
| H | 2.06851600  | 2.08060800  | -0.00001600 |
| H | 3.56077400  | -1.94605500 | 0.00025600  |
| H | 4.30284600  | 1.45993600  | 0.00015400  |

**\* GS of F5 at WB97XD/6-311++G(d,p)**

|   |             |            |             |
|---|-------------|------------|-------------|
| O | -0.39465600 | 1.43376500 | -0.00011600 |
| O | 4.24524400  | 0.49735100 | 0.00017400  |
| O | -2.53022100 | 1.98347900 | -0.00031700 |

|   |             |             |             |
|---|-------------|-------------|-------------|
| N | -4.49967500 | -1.01560800 | 0.00028600  |
| C | 0.34200100  | -0.85305400 | 0.00003400  |
| C | 0.61336000  | 0.52069200  | -0.00002100 |
| C | 1.43107100  | -1.74578700 | 0.00013100  |
| C | -1.01859800 | -1.26207200 | -0.00001900 |
| C | 1.90658700  | 1.01586000  | 0.00002200  |
| C | 2.95921300  | 0.10789800  | 0.00012300  |
| C | 2.72071600  | -1.27880300 | 0.00017600  |
| C | -2.01392200 | -0.33522100 | -0.00013000 |
| C | -1.71827800 | 1.09543300  | -0.00014900 |
| C | -3.38911500 | -0.70861000 | -0.00024500 |
| H | 1.23745400  | -2.81206800 | 0.00017000  |
| H | -1.25743700 | -2.31990300 | 0.00001100  |
| H | 2.07493300  | 2.08590200  | -0.00002300 |
| H | 3.56519100  | -1.95579100 | 0.00025200  |
| H | 4.31644300  | 1.45634900  | 0.00013700  |

**\* ES of F5 at PBE0/6-311++G(d,p)**

|   |             |             |             |
|---|-------------|-------------|-------------|
| O | 0.39537400  | -1.44669600 | -0.00040400 |
| O | -4.23466200 | -0.52089400 | 0.00033400  |
| O | 2.53202700  | -1.98434000 | -0.00024700 |
| N | 4.49954400  | 1.00534200  | 0.00050000  |
| C | -0.33224300 | 0.88343000  | -0.00008700 |
| C | -0.60790700 | -0.53061300 | -0.00014500 |
| C | -1.45435700 | 1.76018600  | 0.00007100  |
| C | 1.00040200  | 1.32172000  | -0.00014100 |
| C | -1.88938500 | -1.02413600 | 0.00000800  |
| C | -2.96380300 | -0.12571000 | 0.00018300  |
| C | -2.73485400 | 1.27656500  | 0.00019600  |
| C | 2.02618600  | 0.33181900  | -0.00012000 |
| C | 1.73047800  | -1.07419200 | -0.00028700 |
| C | 3.38139000  | 0.68328400  | 0.00005800  |
| H | -1.27439700 | 2.82907700  | 0.00009800  |
| H | 1.24577700  | 2.37461600  | -0.00009500 |
| H | -2.05140500 | -2.09660100 | -0.00003800 |
| H | -3.59110700 | 1.94095300  | 0.00031400  |
| H | -4.30303700 | -1.48410600 | 0.00033400  |

**\* ES of F5 at APFD/6-311++G(d,p)**

|   |            |             |             |
|---|------------|-------------|-------------|
| O | 0.39363100 | -1.45344100 | -0.00019900 |
|---|------------|-------------|-------------|

|   |             |             |             |
|---|-------------|-------------|-------------|
| O | -4.24217500 | -0.51444500 | 0.00013300  |
| O | 2.54144900  | -1.98169900 | -0.00014900 |
| N | 4.50166000  | 1.00804400  | -0.00050600 |
| C | -0.33318100 | 0.88283800  | 0.00005600  |
| C | -0.60877500 | -0.53368200 | -0.00004300 |
| C | -1.45367800 | 1.76021800  | 0.00014600  |
| C | 1.00025300  | 1.32194200  | 0.00006300  |
| C | -1.89041900 | -1.02845900 | -0.00000700 |
| C | -2.96598300 | -0.12758500 | 0.00010100  |
| C | -2.73574500 | 1.27566600  | 0.00016700  |
| C | 2.02721200  | 0.33346300  | 0.00008800  |
| C | 1.73385800  | -1.07523800 | -0.00000400 |
| C | 3.38247100  | 0.68657900  | 0.00021700  |
| H | -1.27257300 | 2.82932200  | 0.00020500  |
| H | 1.24460700  | 2.37539300  | 0.00010400  |
| H | -2.05180000 | -2.10142700 | -0.00008000 |
| H | -3.59261600 | 1.94003300  | 0.00023500  |
| H | -4.31855800 | -1.47740400 | 0.00009500  |

**\* ES of F5 at B3LYP/6-311++G(d,p)**

|   |             |             |             |
|---|-------------|-------------|-------------|
| O | 0.39564600  | -1.45617300 | -0.00022800 |
| O | -4.25633800 | -0.51581500 | 0.00018600  |
| O | 2.54455400  | -1.99743400 | -0.00012500 |
| N | 4.51052500  | 1.02187400  | -0.00018300 |
| C | -0.33349100 | 0.88303800  | 0.00001200  |
| C | -0.61482100 | -0.53381000 | -0.00006300 |
| C | -1.45536600 | 1.76453300  | 0.00012900  |
| C | 1.00576100  | 1.31860200  | 0.00000900  |
| C | -1.90072800 | -1.02654000 | 0.00000100  |
| C | -2.97413300 | -0.12267700 | 0.00012100  |
| C | -2.74119700 | 1.28248200  | 0.00017800  |
| C | 2.03802500  | 0.32911400  | -0.00001000 |
| C | 1.74393500  | -1.08066900 | -0.00018300 |
| C | 3.39404400  | 0.69084600  | 0.00013800  |
| H | -1.27443900 | 2.83209800  | 0.00018500  |
| H | 1.25107300  | 2.37019800  | 0.00008300  |
| H | -2.06649100 | -2.09723600 | -0.00005800 |
| H | -3.59441600 | 1.94884800  | 0.00026500  |
| H | -4.33246900 | -1.48115900 | 0.00015500  |

**\* ES of F5 at BP86/6-311++G(d,p)**

|   |             |             |             |
|---|-------------|-------------|-------------|
| O | 0.38965200  | -1.46393600 | -0.00006600 |
| O | -4.29152100 | -0.50888500 | 0.00001000  |
| O | 2.55447600  | -2.01428300 | -0.00002900 |
| N | 4.54557100  | 1.01891700  | -0.00074600 |
| C | -0.33618500 | 0.88730900  | 0.00013700  |
| C | -0.62168600 | -0.53072200 | 0.00002800  |
| C | -1.44905700 | 1.76991200  | 0.00023400  |
| C | 1.02153100  | 1.32757400  | 0.00015600  |
| C | -1.91948800 | -1.03141700 | 0.00003200  |
| C | -2.99224900 | -0.12398700 | 0.00005700  |
| C | -2.75428700 | 1.28629200  | 0.00015200  |
| C | 2.05209600  | 0.33381500  | 0.00006600  |
| C | 1.75435700  | -1.08111500 | -0.00001200 |
| C | 3.41407800  | 0.68937600  | 0.00002500  |
| H | -1.26855800 | 2.84662000  | 0.00031300  |
| H | 1.26703900  | 2.38818800  | 0.00025500  |
| H | -2.08249300 | -2.11154200 | -0.00002100 |
| H | -3.61016800 | 1.96357600  | 0.00016600  |
| H | -4.36034100 | -1.48463400 | -0.00005300 |

**\* ES of F5 at CAM-B3LYP/6-311++G(d,p)**

|   |             |             |             |
|---|-------------|-------------|-------------|
| O | 0.39717300  | -1.45203000 | -0.00028500 |
| O | -4.23073300 | -0.52082700 | 0.00024800  |
| O | 2.53794000  | -1.98200300 | -0.00024900 |
| N | 4.49102500  | 1.01501500  | 0.00024200  |
| C | -0.33058500 | 0.88112700  | -0.00002400 |
| C | -0.61020600 | -0.53590600 | -0.00008800 |
| C | -1.45997200 | 1.76071600  | 0.00010300  |
| C | 0.99316600  | 1.31673500  | -0.00007100 |
| C | -1.88736400 | -1.02426600 | 0.00000800  |
| C | -2.95974400 | -0.12363900 | 0.00014900  |
| C | -2.73246000 | 1.27839400  | 0.00018500  |
| C | 2.02447500  | 0.32975500  | -0.00008200 |
| C | 1.73516300  | -1.07621000 | -0.00018100 |
| C | 3.38071400  | 0.68970800  | 0.00000500  |
| H | -1.27803300 | 2.82757000  | 0.00013700  |
| H | 1.23749700  | 2.36807800  | -0.00004500 |
| H | -2.05334800 | -2.09436600 | -0.00004500 |
| H | -3.58957100 | 1.93885000  | 0.00028100  |

|   |             |             |            |
|---|-------------|-------------|------------|
| H | -4.30788400 | -1.48483000 | 0.00023100 |
|---|-------------|-------------|------------|

**\* ES of F5 at M06/6-311++G(d,p)**

|   |             |             |             |
|---|-------------|-------------|-------------|
| O | 0.39695900  | -1.44746600 | -0.00019000 |
| O | -4.23163300 | -0.51853600 | 0.00012400  |
| O | 2.53707700  | -1.97862600 | -0.00013900 |
| N | 4.49423100  | 1.00800500  | -0.00059400 |
| C | -0.33329500 | 0.87892900  | 0.00006100  |
| C | -0.60873500 | -0.53336900 | -0.00004000 |
| C | -1.45394200 | 1.75671500  | 0.00014800  |
| C | 0.99571900  | 1.31786700  | 0.00007700  |
| C | -1.88865900 | -1.02327200 | -0.00001200 |
| C | -2.96161400 | -0.12480300 | 0.00009400  |
| C | -2.73157400 | 1.27553500  | 0.00016400  |
| C | 2.02242800  | 0.33207200  | 0.00010900  |
| C | 1.73309000  | -1.07601100 | 0.00001700  |
| C | 3.37682900  | 0.68698800  | 0.00025600  |
| H | -1.26826500 | 2.82554700  | 0.00020900  |
| H | 1.23743500  | 2.37268100  | 0.00012200  |
| H | -2.05277200 | -2.09624300 | -0.00009000 |
| H | -3.59015500 | 1.93787900  | 0.00023100  |
| H | -4.30656300 | -1.48278400 | 0.00008700  |

**\* ES of F5 at M06-2X/6-311++G(d,p)**

|   |             |             |             |
|---|-------------|-------------|-------------|
| O | 0.39674200  | -1.45392800 | -0.00041100 |
| O | -4.23046900 | -0.52369200 | 0.00038900  |
| O | 2.53838200  | -1.97784700 | -0.00034100 |
| N | 4.49922700  | 1.00509200  | 0.00108900  |
| C | -0.33206600 | 0.88414700  | -0.00013000 |
| C | -0.60792500 | -0.53792900 | -0.00015500 |
| C | -1.46360100 | 1.76451100  | 0.00005400  |
| C | 0.99315300  | 1.32523100  | -0.00024500 |
| C | -1.88681400 | -1.02933200 | 0.00002400  |
| C | -2.96272800 | -0.12687900 | 0.00021100  |
| C | -2.73818000 | 1.28008100  | 0.00021300  |
| C | 2.02259300  | 0.33506300  | -0.00027100 |
| C | 1.73513600  | -1.07554800 | -0.00039000 |
| C | 3.38484900  | 0.68898100  | -0.00019300 |
| H | -1.28021900 | 2.83167200  | 0.00006800  |
| H | 1.23690100  | 2.37771400  | -0.00023100 |

|   |             |             |             |
|---|-------------|-------------|-------------|
| H | -2.05085000 | -2.10029400 | -0.00000400 |
| H | -3.59869500 | 1.93685300  | 0.00034800  |
| H | -4.30546000 | -1.48780200 | 0.00039100  |

**\* ES of F5 at PBE/6-311++G(d,p)**

|   |             |             |             |
|---|-------------|-------------|-------------|
| O | 0.38944900  | -1.46092200 | -0.00011700 |
| O | -4.28491700 | -0.50964800 | 0.00012800  |
| O | 2.55091400  | -2.01060200 | -0.00005800 |
| N | 4.54089500  | 1.01453100  | -0.00010700 |
| C | -0.33598300 | 0.88649900  | -0.00000200 |
| C | -0.61983400 | -0.52942000 | -0.00005400 |
| C | -1.44771000 | 1.76745400  | 0.00016200  |
| C | 1.02012400  | 1.32704900  | 0.00000700  |
| C | -1.91624300 | -1.02979300 | -0.00000400 |
| C | -2.98849200 | -0.12435700 | 0.00007200  |
| C | -2.75130900 | 1.28411300  | 0.00018900  |
| C | 2.04846200  | 0.33420900  | -0.00003600 |
| C | 1.75025500  | -1.07877800 | -0.00014700 |
| C | 3.40898200  | 0.68803700  | -0.00011200 |
| H | -1.26732300 | 2.84373100  | 0.00027900  |
| H | 1.26511500  | 2.38733400  | 0.00004400  |
| H | -2.07847700 | -2.10963800 | -0.00004100 |
| H | -3.60719200 | 1.96070500  | 0.00030300  |
| H | -4.35145600 | -1.48454900 | 0.00008600  |

**\* ES of F5 at PW6B95D3/6-311++G(d,p)**

|   |             |             |             |
|---|-------------|-------------|-------------|
| O | 0.39501700  | -1.44518400 | -0.00020700 |
| O | -4.22713300 | -0.52161400 | 0.00013600  |
| O | 2.53154800  | -1.97838500 | -0.00015300 |
| N | 4.48941300  | 1.00322200  | -0.00053300 |
| C | -0.33227600 | 0.88167100  | 0.00005500  |
| C | -0.60786600 | -0.52916900 | -0.00004600 |
| C | -1.45313900 | 1.75649500  | 0.00014500  |
| C | 0.99657300  | 1.31898500  | 0.00006500  |
| C | -1.88526800 | -1.02191100 | -0.00001200 |
| C | -2.95668400 | -0.12533000 | 0.00010000  |
| C | -2.72971600 | 1.27376400  | 0.00016500  |
| C | 2.02106200  | 0.33184200  | 0.00010200  |
| C | 1.72937200  | -1.07121800 | 0.00001000  |
| C | 3.37446000  | 0.68311900  | 0.00024300  |

|   |             |             |             |
|---|-------------|-------------|-------------|
| H | -1.27344700 | 2.82031900  | 0.00020300  |
| H | 1.24012100  | 2.36711500  | 0.00010400  |
| H | -2.04677500 | -2.08928500 | -0.00008900 |
| H | -3.58297300 | 1.93371800  | 0.00023400  |
| H | -4.29738500 | -1.48244500 | 0.00010200  |

**\* ES of F5 at WB97XD/6-311++G(d,p)**

|   |             |             |             |
|---|-------------|-------------|-------------|
| O | 0.39615000  | -1.45213800 | -0.00032200 |
| O | -4.23069300 | -0.52156700 | 0.00028800  |
| O | 2.53491900  | -1.98387100 | -0.00027200 |
| N | 4.49620200  | 1.01235600  | 0.00044600  |
| C | -0.32998100 | 0.88344700  | -0.00005200 |
| C | -0.60778800 | -0.53649700 | -0.00010700 |
| C | -1.46103200 | 1.76321100  | 0.00008800  |
| C | 0.99423700  | 1.32194700  | -0.00011100 |
| C | -1.88701200 | -1.02640000 | 0.00001200  |
| C | -2.96160100 | -0.12538400 | 0.00016600  |
| C | -2.73471200 | 1.27907700  | 0.00019100  |
| C | 2.02454400  | 0.33083400  | -0.00012500 |
| C | 1.73297900  | -1.07722800 | -0.00024000 |
| C | 3.38235200  | 0.68839400  | -0.00003000 |
| H | -1.27982200 | 2.83089600  | 0.00011700  |
| H | 1.23878800  | 2.37418300  | -0.00008400 |
| H | -2.05172400 | -2.09729100 | -0.00003400 |
| H | -3.59173200 | 1.94066900  | 0.00029600  |
| H | -4.30384400 | -1.48275900 | 0.00027600  |

**S3-F6. The coordinates of the optimized structures for the GS and ES of F6 compound**

**\* GS of F6 at PBE0/6-311++G(d,p)**

|   |             |             |             |
|---|-------------|-------------|-------------|
| O | -0.60519600 | 1.40003400  | 0.20379800  |
| O | -2.63875000 | 2.21344700  | 0.31268800  |
| O | -4.19925800 | -1.69257900 | -0.30702000 |
| N | 3.94586100  | 0.08054800  | 0.00938900  |
| N | -4.76294800 | 0.49075800  | 0.15582300  |
| N | -5.94523300 | 0.13305900  | 0.11783900  |
| N | -7.04565000 | -0.07876200 | 0.10737600  |
| C | 2.63316200  | -0.23049100 | -0.05578800 |
| C | 4.40395700  | 1.42323100  | 0.34712500  |
| C | 4.99395600  | -0.90077200 | -0.25042600 |

|   |             |             |             |
|---|-------------|-------------|-------------|
| C | 1.63604200  | 0.76010300  | 0.10865400  |
| C | 0.30772500  | 0.41113700  | 0.04611700  |
| C | -0.12241500 | -0.91157700 | -0.17997100 |
| C | 2.20557700  | -1.57629300 | -0.29004400 |
| C | 0.87870800  | -1.89464500 | -0.34730900 |
| C | 4.53113800  | 2.33816500  | -0.86303500 |
| C | 5.40688400  | -1.68283800 | 0.98841600  |
| C | -1.49869900 | -1.15301200 | -0.21404100 |
| C | -2.42898300 | -0.15005000 | -0.04035400 |
| C | -1.97914300 | 1.21392400  | 0.16872800  |
| C | -3.83867600 | -0.54976600 | -0.08636800 |
| H | 5.37526300  | 1.31456500  | 0.83675300  |
| H | 3.73668900  | 1.85451900  | 1.09715600  |
| H | 5.85094700  | -0.35038700 | -0.64746400 |
| H | 4.67422700  | -1.57183800 | -1.05047200 |
| H | 1.88270800  | 1.80088800  | 0.26504700  |
| H | 2.93585200  | -2.36523900 | -0.40499700 |
| H | 0.57832100  | -2.92382100 | -0.51658000 |
| H | 5.23408300  | 1.92523600  | -1.59177800 |
| H | 4.90187800  | 3.31860500  | -0.55220800 |
| H | 3.56831300  | 2.47862600  | -1.36078500 |
| H | 5.76659500  | -1.01099300 | 1.77258500  |
| H | 4.57123300  | -2.26021500 | 1.39220100  |
| H | 6.21440100  | -2.37684900 | 0.74003900  |
| H | -1.86449100 | -2.16221600 | -0.37844200 |

**\* ES of F6 at PBE0/6-311++G(d,p)**

|   |             |             |             |
|---|-------------|-------------|-------------|
| O | -0.60688700 | 1.38808600  | 0.18428000  |
| O | -2.63858000 | 2.19058500  | 0.29902400  |
| O | -4.21783000 | -1.70235900 | -0.27286400 |
| N | 3.95598300  | 0.09489400  | 0.01320800  |
| N | -4.76518200 | 0.50414000  | 0.14511900  |
| N | -5.95134200 | 0.16986400  | 0.12161500  |
| N | -7.06282900 | -0.02238100 | 0.12225800  |
| C | 2.63795600  | -0.24025900 | -0.05766800 |
| C | 4.39506100  | 1.43600800  | 0.36516200  |
| C | 5.01235500  | -0.86813000 | -0.25520800 |
| C | 1.63060200  | 0.74476700  | 0.10163800  |
| C | 0.30321100  | 0.38818500  | 0.03281300  |
| C | -0.11825000 | -0.93950500 | -0.18873700 |



|   |             |             |             |
|---|-------------|-------------|-------------|
| C | 2.22856600  | -1.58520100 | -0.28951300 |
| C | 0.89621700  | -1.91323900 | -0.34763400 |
| C | 4.52177300  | 2.35635800  | -0.84678200 |
| C | 5.42990600  | -1.65257200 | 0.98655000  |
| C | -1.51198300 | -1.20822000 | -0.22970400 |
| C | -2.43845700 | -0.17618700 | -0.04524000 |
| C | -1.97880100 | 1.18939500  | 0.15596200  |
| C | -3.84798100 | -0.54196000 | -0.07520500 |
| H | 5.36728100  | 1.33285300  | 0.85396400  |
| H | 3.71476600  | 1.85722500  | 1.10791900  |
| H | 5.86541400  | -0.30311300 | -0.63965000 |
| H | 4.69570800  | -1.54000700 | -1.05511300 |
| H | 1.86848100  | 1.78754400  | 0.26042500  |
| H | 2.96345600  | -2.37039100 | -0.40250900 |
| H | 0.60631000  | -2.94506900 | -0.51405700 |
| H | 5.23197200  | 1.95219600  | -1.57221000 |
| H | 4.88503000  | 3.33382300  | -0.51952000 |
| H | 3.55884600  | 2.49252300  | -1.34420700 |
| H | 5.78662200  | -0.98183900 | 1.77193700  |
| H | 4.59793100  | -2.23871700 | 1.38332300  |
| H | 6.24216800  | -2.33520900 | 0.72435800  |
| H | -1.87508200 | -2.21457500 | -0.39216900 |

**S3-F7. The coordinates of the optimized structures for the GS and ES of F7 compound**

**\* GS of F7 at PBE0/6-311++G(d,p)**

|   |             |             |             |
|---|-------------|-------------|-------------|
| O | 0.80184600  | 2.12536300  | -0.19881400 |
| O | 2.17466600  | 3.84986600  | -0.14542400 |
| O | 5.16352500  | -2.39811500 | 0.49919200  |
| O | 3.97010100  | -0.98894700 | 1.77344800  |
| N | -2.41198900 | -1.39783700 | -0.33197600 |
| C | 1.60004400  | -0.13111300 | -0.43359500 |
| C | 2.95198100  | 0.36129200  | -0.46440200 |
| C | 0.55479400  | 0.79104800  | -0.29337000 |
| C | -1.11586900 | -0.93500700 | -0.34430600 |
| C | 1.23641400  | -1.48582200 | -0.53832200 |
| C | -0.77996300 | 0.41714500  | -0.25216600 |
| C | 4.09777800  | -0.58330600 | -0.59583200 |
| C | -0.07774600 | -1.88297100 | -0.49344400 |
| C | 3.15377900  | 1.70445700  | -0.37063100 |
| C | 2.07684800  | 2.64164400  | -0.23277600 |

|   |             |             |             |
|---|-------------|-------------|-------------|
| C | -3.59141400 | -0.70845900 | -0.03326800 |
| C | 4.42826900  | -1.40360100 | 0.68810200  |
| C | -4.76078300 | -1.05916300 | -0.71805100 |
| C | -3.65834800 | 0.26614600  | 0.96792800  |
| C | -5.96608300 | -0.44145100 | -0.41453600 |
| C | -4.86694100 | 0.89109900  | 1.25110500  |
| C | -6.02677300 | 0.54606200  | 0.56465800  |
| H | 2.01001300  | -2.23774100 | -0.64663400 |
| H | -1.53232100 | 1.19063100  | -0.17481800 |
| H | 5.00421500  | -0.02564700 | -0.84988900 |
| H | 3.92515800  | -1.28989400 | -1.41222400 |
| H | -0.32947900 | -2.93605400 | -0.56814400 |
| H | 4.14989000  | 2.12969100  | -0.39719300 |
| H | -2.53816400 | -2.32926000 | -0.69808900 |
| H | -4.71688100 | -1.81895900 | -1.49264100 |
| H | -2.77597900 | 0.51688600  | 1.54460400  |
| H | -6.86162400 | -0.72869900 | -0.95613100 |
| H | -4.90086500 | 1.64514200  | 2.03100900  |
| H | -6.96705900 | 1.03541600  | 0.79420500  |

**\* ES of F7 at PBE0/6-311++G(d,p)**

|   |             |             |             |
|---|-------------|-------------|-------------|
| O | 1.18725800  | 2.36845200  | -0.02015700 |
| O | 2.82187600  | 3.71483200  | 0.64223300  |
| O | 4.27009800  | -3.17371700 | 0.27211400  |
| O | 3.41229100  | -1.74630600 | 1.76953900  |
| N | -2.60515900 | -0.20919200 | -1.34626700 |
| C | 1.56406600  | 0.03567200  | -0.57296000 |
| C | 2.93452200  | 0.20056200  | -0.29731500 |
| C | 0.70219900  | 1.15803300  | -0.41949100 |
| C | -1.21046800 | -0.14406900 | -1.07236900 |
| C | 0.95186500  | -1.18347700 | -0.99531100 |
| C | -0.65248900 | 1.08484600  | -0.66041100 |
| C | 3.88629400  | -0.94048400 | -0.45284400 |
| C | -0.40352600 | -1.26771800 | -1.24488200 |
| C | 3.39145600  | 1.46157500  | 0.12670800  |
| C | 2.54972300  | 2.56658600  | 0.28076000  |
| C | -3.57188100 | -0.23453400 | -0.42153900 |
| C | 3.83488100  | -2.05152100 | 0.63146300  |
| C | -4.93404300 | -0.22571900 | -0.84138600 |
| C | -3.25468600 | -0.26851200 | 0.96620200  |

|   |             |             |             |
|---|-------------|-------------|-------------|
| C | -5.93042100 | -0.24258200 | 0.09854600  |
| C | -4.27426400 | -0.28536200 | 1.88648800  |
| C | -5.60953700 | -0.27023800 | 1.46524300  |
| H | 1.56679600  | -2.06794900 | -1.11535400 |
| H | -1.27103900 | 1.96674100  | -0.53795000 |
| H | 4.91400400  | -0.55860600 | -0.43936700 |
| H | 3.75664100  | -1.42866700 | -1.42510300 |
| H | -0.84698000 | -2.20578800 | -1.56290600 |
| H | 4.44018800  | 1.61949300  | 0.34930800  |
| H | -2.90464700 | -0.20626100 | -2.31764100 |
| H | -5.16067100 | -0.20069600 | -1.90124000 |
| H | -2.21596100 | -0.28770700 | 1.26902200  |
| H | -6.96812500 | -0.23395100 | -0.21188900 |
| H | -4.04394200 | -0.31365700 | 2.94456300  |
| H | -6.40448400 | -0.28306300 | 2.20118800  |

**S3-F8. The coordinates of the optimized structures for the GS and ES of F8 compound**

**\* GS of F8 at PBE0/6-311++G(d,p)**

|   |             |             |             |
|---|-------------|-------------|-------------|
| O | 4.07468200  | 0.23298700  | 0.09735300  |
| O | -0.03295600 | 1.53781900  | -0.01377000 |
| O | 3.31338100  | -1.86236200 | -0.06835300 |
| O | -4.61777600 | 0.43896300  | 0.00815600  |
| O | 2.03586900  | 2.25187300  | -0.03296000 |
| C | -0.65859700 | -0.76645700 | 0.00099900  |
| C | 1.71191300  | -0.13569200 | -0.00480500 |
| C | -1.01738800 | 0.59838500  | -0.00448400 |
| C | 0.70879800  | -1.07841400 | -0.00132900 |
| C | 3.15708300  | -0.61471300 | 0.00724800  |
| C | -1.71454700 | -1.71112300 | 0.00996900  |
| C | 1.33637000  | 1.25860900  | -0.01586400 |
| C | -2.32488100 | 1.02483500  | -0.00235000 |
| C | -3.40468900 | 0.08251500  | 0.00629500  |
| C | -3.02281600 | -1.31531900 | 0.01265400  |
| H | 1.02086300  | -2.11932700 | -0.00035800 |
| H | -1.46063600 | -2.76843400 | 0.01499100  |
| H | -2.54930500 | 2.08675500  | -0.00768900 |
| H | -3.82399500 | -2.04898700 | 0.01963900  |

**\* ES of F8 at PBE0/6-311++G(d,p)**

|   |             |            |            |
|---|-------------|------------|------------|
| O | -3.71236700 | 0.57652700 | 1.13266000 |
|---|-------------|------------|------------|

|   |             |             |             |
|---|-------------|-------------|-------------|
| O | 0.02178700  | -1.52972600 | -0.03353100 |
| O | -3.66958600 | 0.81352200  | -1.09015000 |
| O | 4.60438200  | -0.50963700 | 0.01266500  |
| O | -2.11112100 | -2.16372500 | -0.04219300 |
| C | 0.67055600  | 0.81387200  | 0.00080300  |
| C | -1.68101100 | 0.18746600  | 0.00114700  |
| C | 0.99388700  | -0.56576600 | -0.01204600 |
| C | -0.70412200 | 1.19786200  | 0.00023500  |
| C | -3.14516800 | 0.54758200  | 0.01638700  |
| C | 1.76388400  | 1.72372900  | 0.01553500  |
| C | -1.34518200 | -1.18837100 | -0.02179200 |
| C | 2.29560700  | -1.01014200 | -0.00728400 |
| C | 3.41015200  | -0.09285000 | 0.00836300  |
| C | 3.07347200  | 1.30708300  | 0.01840800  |
| H | -0.98134300 | 2.24538500  | 0.00854300  |
| H | 1.53597200  | 2.78652300  | 0.02429600  |
| H | 2.50053300  | -2.07588600 | -0.01633200 |
| H | 3.88761800  | 2.02549700  | 0.02934600  |

-----

### S3-F9. The coordinates of the optimized structures for the GS and ES of F9 compound

#### \* GS of F9 at PBE0/6-311++G(d,p)

|   |             |             |             |
|---|-------------|-------------|-------------|
| O | 0.00167500  | 2.34759700  | 0.12291000  |
| O | -1.62006300 | 3.84128100  | 0.17429100  |
| O | -3.80013300 | -2.73096400 | -0.02041000 |
| O | -2.78136200 | -1.46903900 | 1.52071200  |
| N | 3.72416800  | -0.58373200 | 0.08206400  |
| C | -0.41595900 | 0.02533600  | -0.35201700 |
| C | -1.81082500 | 0.32566700  | -0.47481200 |
| C | 0.46318400  | 1.07718900  | -0.04601700 |
| C | 2.38899400  | -0.38116700 | -0.05816800 |
| C | 1.82521800  | 0.89984300  | 0.09959100  |
| C | 0.16211200  | -1.24730900 | -0.51106100 |
| C | 1.51219800  | -1.45590600 | -0.37188500 |
| C | -2.79883400 | -0.75536200 | -0.79376500 |
| C | -2.23499400 | 1.60629800  | -0.30655100 |
| C | -1.32686900 | 2.67590600  | 0.00482100  |
| C | 4.28741500  | -1.90813100 | -0.08560800 |
| C | 4.59632800  | 0.52746900  | 0.39930500  |
| C | -3.09779800 | -1.66408500 | 0.37477500  |

|   |             |             |             |
|---|-------------|-------------|-------------|
| H | 2.42948100  | 1.76547200  | 0.33509200  |
| H | -0.46803200 | -2.09651200 | -0.75297900 |
| H | 1.90404500  | -2.45537200 | -0.50500000 |
| H | -2.46441400 | -1.37083800 | -1.63389100 |
| H | -3.75303100 | -0.31669600 | -1.10148900 |
| H | -3.27895600 | 1.87952200  | -0.39658400 |
| H | 4.10877900  | -2.29971300 | -1.09348800 |
| H | 3.87526800  | -2.61810800 | 0.64034100  |
| H | 5.36337700  | -1.85578000 | 0.06898800  |
| H | 4.56193000  | 1.30114300  | -0.37669600 |
| H | 5.62046100  | 0.16662100  | 0.47158500  |
| H | 4.32943800  | 0.98800200  | 1.35765900  |
| H | -3.99949500 | -3.26709000 | 0.76034600  |

**\* ES of F9 at PBE0/6-311++G(d,p)**

|   |             |             |             |
|---|-------------|-------------|-------------|
| O | 0.06261300  | 2.36764000  | 0.11936900  |
| O | -1.54838900 | 3.89847600  | 0.17944500  |
| O | -3.90830700 | -2.68062700 | -0.05412000 |
| O | -2.83553600 | -1.49737300 | 1.51008200  |
| N | 3.73018600  | -0.61641200 | 0.07580100  |
| C | -0.41452400 | 0.02474900  | -0.33250800 |
| C | -1.81170400 | 0.32421300  | -0.47404800 |
| C | 0.48198400  | 1.08453600  | -0.04079400 |
| C | 2.38734600  | -0.42111800 | -0.05538000 |
| C | 1.83629100  | 0.87831200  | 0.09291100  |
| C | 0.15551100  | -1.26633800 | -0.46566400 |
| C | 1.50901000  | -1.49470900 | -0.33776100 |
| C | -2.80312900 | -0.73494400 | -0.79640700 |
| C | -2.19703800 | 1.65784700  | -0.29268900 |
| C | -1.30054900 | 2.70538200  | 0.00457500  |
| C | 4.29342400  | -1.93801400 | -0.08903400 |
| C | 4.61615600  | 0.48762600  | 0.37787200  |
| C | -3.15760800 | -1.64922400 | 0.35797100  |
| H | 2.45879000  | 1.73575000  | 0.31092700  |
| H | -0.49154900 | -2.10912200 | -0.68003900 |
| H | 1.88728300  | -2.50172900 | -0.44996700 |
| H | -2.47699500 | -1.37472500 | -1.62741400 |
| H | -3.74551500 | -0.28608400 | -1.13022700 |
| H | -3.23930800 | 1.94594700  | -0.38039200 |
| H | 4.07192200  | -2.33435900 | -1.08635000 |

|   |             |             |             |
|---|-------------|-------------|-------------|
| H | 3.88646600  | -2.63208500 | 0.65535900  |
| H | 5.37166200  | -1.88562600 | 0.03529400  |
| H | 4.57719700  | 1.24920800  | -0.40893300 |
| H | 5.63465400  | 0.11559400  | 0.45031100  |
| H | 4.34687300  | 0.95783500  | 1.32973400  |
| H | -4.12686200 | -3.22055200 | 0.71860100  |

**S3-F10. The coordinates of the optimized structures for the GS and ES of F10 compound**

**\* GS of F10 at PBE0/6-311++G(d,p)**

|   |             |             |             |
|---|-------------|-------------|-------------|
| O | 2.85943100  | 0.18925400  | 1.03759600  |
| O | -2.95819500 | 2.27154600  | -0.45047600 |
| O | 4.99735100  | 1.44358800  | -0.24368200 |
| O | 2.88594300  | -2.53829400 | 0.46330400  |
| O | 1.65689400  | 0.51188800  | -0.85386400 |
| O | -2.41117300 | 4.40088800  | -0.62487200 |
| N | 3.78382100  | -0.43633200 | 0.26287400  |
| N | -4.47024700 | -2.21204200 | -0.20927100 |
| C | -1.45477100 | 0.63783600  | 0.47933800  |
| C | -0.48885900 | 1.67614500  | 0.67184400  |
| C | 5.66878500  | -0.78743500 | -1.02629700 |
| C | 4.96002400  | -2.12449200 | -0.78815200 |
| C | -2.68956900 | 0.98450400  | -0.09434800 |
| C | 0.84992200  | 1.36840500  | 1.27556600  |
| C | -3.50085100 | -1.28825500 | 0.01074300  |
| C | 4.83911600  | 0.25357100  | -0.32227900 |
| C | 3.74553200  | -1.80838500 | 0.04393700  |
| C | -1.27792600 | -0.71715600 | 0.81461500  |
| C | -3.69314200 | 0.06550800  | -0.32812800 |
| C | -2.25639500 | -1.65443900 | 0.59382000  |
| C | -0.79103800 | 2.95092000  | 0.31081300  |
| C | 1.76943900  | 0.66030000  | 0.32158100  |
| C | -2.05970000 | 3.29459700  | -0.27297400 |
| C | -4.25783400 | -3.59955700 | 0.15080500  |
| C | -5.73036300 | -1.81380800 | -0.80096800 |
| H | 5.73505700  | -0.52022500 | -2.08274300 |
| H | 6.68022300  | -0.75963600 | -0.61576000 |
| H | 4.63057800  | -2.60479500 | -1.71154200 |
| H | 5.57480100  | -2.84434800 | -0.24403500 |

|   |             |             |             |
|---|-------------|-------------|-------------|
| H | 1.35698600  | 2.29177600  | 1.57230700  |
| H | 0.75784400  | 0.76647400  | 2.18441900  |
| H | -0.34627800 | -1.04391800 | 1.26429200  |
| H | -4.61384200 | 0.41836600  | -0.77266000 |
| H | -2.06794700 | -2.68276900 | 0.87156400  |
| H | -0.09116700 | 3.76647500  | 0.44331100  |
| H | -3.40922600 | -4.03246700 | -0.39063800 |
| H | -4.07977300 | -3.71615200 | 1.22581400  |
| H | -5.14770900 | -4.17053500 | -0.10680700 |
| H | -6.37018400 | -2.68874500 | -0.89755200 |
| H | -6.25248800 | -1.07706700 | -0.17931000 |
| H | -5.58811100 | -1.38432900 | -1.79942400 |

**\* ES of F10 at PBE0/6-311++G(d,p)**

|   |             |             |             |
|---|-------------|-------------|-------------|
| O | 2.88867900  | 0.20125800  | 1.03801900  |
| O | -3.02110100 | 2.26773200  | -0.42956300 |
| O | 5.02720200  | 1.45843600  | -0.24118100 |
| O | 2.92524500  | -2.52779100 | 0.46727100  |
| O | 1.69480200  | 0.50216200  | -0.86230200 |
| O | -2.48150700 | 4.41550800  | -0.61861100 |
| N | 3.81974500  | -0.42385300 | 0.27186900  |
| N | -4.49421400 | -2.21881500 | -0.20245500 |
| C | -1.46314000 | 0.62860700  | 0.46646100  |
| C | -0.48372900 | 1.66036600  | 0.67435000  |
| C | 5.70605400  | -0.77152600 | -1.01808200 |
| C | 4.99945300  | -2.10964600 | -0.78117700 |
| C | -2.71753700 | 0.98830700  | -0.08613700 |
| C | 0.84691300  | 1.35585900  | 1.26222300  |
| C | -3.50622300 | -1.30582500 | 0.01818000  |
| C | 4.87170800  | 0.26738400  | -0.31613900 |
| C | 3.78397600  | -1.79466400 | 0.05015300  |
| C | -1.27581000 | -0.74184400 | 0.77191600  |
| C | -3.71126100 | 0.06035500  | -0.30406000 |
| C | -2.25734200 | -1.68731300 | 0.56435500  |
| C | -0.83350300 | 2.95901000  | 0.28922400  |
| C | 1.79253600  | 0.66281700  | 0.31353400  |
| C | -2.08556900 | 3.30689300  | -0.26093100 |
| C | -4.28865700 | -3.60987100 | 0.13458200  |
| C | -5.76046900 | -1.81981800 | -0.77907700 |
| H | 5.77491200  | -0.50440400 | -2.07437700 |

|   |             |             |             |
|---|-------------|-------------|-------------|
| H | 6.71630100  | -0.74153100 | -0.60466800 |
| H | 4.67126900  | -2.58997500 | -1.70504100 |
| H | 5.61484000  | -2.82902100 | -0.23708500 |
| H | 1.35074600  | 2.27797900  | 1.57396800  |
| H | 0.77995700  | 0.73782400  | 2.16742600  |
| H | -0.32978400 | -1.06744700 | 1.18937900  |
| H | -4.64448500 | 0.40916500  | -0.72542600 |
| H | -2.05751800 | -2.71956000 | 0.81771600  |
| H | -0.13237000 | 3.77795100  | 0.41036400  |
| H | -3.45331600 | -4.03053300 | -0.43700800 |
| H | -4.06750500 | -3.72350600 | 1.20167300  |
| H | -5.18945500 | -4.17120100 | -0.09805600 |
| H | -6.39654500 | -2.69528100 | -0.87851000 |
| H | -6.26905900 | -1.08851400 | -0.14118900 |
| H | -5.61766000 | -1.37625400 | -1.77037800 |

**S3-F11. The coordinates of the optimized structures for the GS and ES of F11 compound**

**\* GS of F11 at PBE0/6-311++G(d,p)**

|   |             |             |             |
|---|-------------|-------------|-------------|
| S | -5.83687700 | -0.36197400 | -0.00042100 |
| O | -0.14186900 | -1.46350400 | 0.00040100  |
| O | -2.24903000 | -2.11748100 | 0.00022200  |
| N | 4.47429800  | -0.40295100 | 0.00140500  |
| N | -3.19589500 | 0.47281000  | -0.00022600 |
| C | 0.46251200  | 0.86449400  | 0.00040800  |
| C | 0.81742600  | -0.49365500 | 0.00050400  |
| C | 3.17933200  | 0.00056300  | 0.00079800  |
| C | -0.91916200 | 1.22581000  | 0.00014800  |
| C | 2.12461100  | -0.93386400 | 0.00058500  |
| C | 1.52758500  | 1.78667700  | 0.00027000  |
| C | 2.83879900  | 1.38197500  | 0.00037200  |
| C | -1.84967800 | 0.21713200  | 0.00001300  |
| C | -1.33208700 | 2.65888700  | -0.00005600 |
| C | -1.47486200 | -1.18804800 | 0.00021400  |
| C | 5.54761200  | 0.57107000  | -0.00134000 |
| C | 4.79329600  | -1.81558000 | -0.00100100 |
| C | -4.31014700 | 0.05367800  | -0.00029600 |
| H | 2.30445500  | -2.00026700 | 0.00045400  |
| H | 1.30938400  | 2.84866200  | -0.00002600 |



|   |             |             |             |
|---|-------------|-------------|-------------|
| H | 3.61784300  | 2.13256500  | 0.00004600  |
| H | -0.93540600 | 3.17115400  | -0.88175700 |
| H | -0.93375000 | 3.17196900  | 0.88040100  |
| H | -2.41675400 | 2.75726400  | 0.00086800  |
| H | 5.51390100  | 1.20742300  | -0.89277300 |
| H | 6.50054300  | 0.04552200  | 0.00130600  |
| H | 5.51254500  | 1.21327100  | 0.88573700  |
| H | 5.87470100  | -1.93596800 | 0.00130500  |
| H | 4.39670200  | -2.31626400 | -0.89187500 |
| H | 4.39282500  | -2.31971000 | 0.88609400  |

**\* ES of F11 at PBE0/6-311++G(d,p)**

|   |             |             |             |
|---|-------------|-------------|-------------|
| S | 5.94359400  | -0.03780200 | -0.00108800 |
| O | 0.03421200  | -1.58899700 | -0.00123600 |
| O | 2.10289500  | -2.37013200 | -0.00359100 |
| N | -4.50720700 | -0.26243400 | -0.00046500 |
| N | 3.17417000  | 0.15766600  | -0.00002400 |
| C | -0.42418800 | 0.80245700  | 0.00163000  |
| C | -0.85723700 | -0.55108800 | 0.00042100  |
| C | -3.19423000 | 0.08785800  | 0.00064800  |
| C | 0.95650300  | 1.10747500  | 0.00167300  |
| C | -2.18118000 | -0.90739300 | 0.00030200  |
| C | -1.45663300 | 1.78324800  | 0.00265200  |
| C | -2.78936000 | 1.44845100  | 0.00192300  |
| C | 1.84384500  | -0.01017000 | 0.00019200  |
| C | 1.45084800  | 2.50997800  | 0.00364300  |
| C | 1.39792700  | -1.37716700 | -0.00172200 |
| C | -5.53560900 | 0.75602000  | -0.01317000 |
| C | -4.90010700 | -1.65602700 | 0.01056300  |
| C | 4.35482400  | 0.04552000  | -0.00045700 |
| H | -2.42291300 | -1.96180300 | -0.00212200 |
| H | -1.17964200 | 2.83091000  | 0.00440200  |
| H | -3.52891000 | 2.23808600  | 0.00401000  |
| H | 1.10000200  | 3.06194500  | 0.88582200  |
| H | 1.09772300  | 3.06522400  | -0.87553100 |
| H | 2.54084000  | 2.54565400  | 0.00232500  |
| H | -5.47544200 | 1.38972200  | 0.87927000  |
| H | -6.51108100 | 0.27651700  | -0.03164200 |
| H | -5.44542700 | 1.39593000  | -0.89816000 |
| H | -5.98532600 | -1.71869700 | 0.02657600  |

|   |             |             |             |
|---|-------------|-------------|-------------|
| H | -4.51012900 | -2.16957700 | 0.89636900  |
| H | -4.53521100 | -2.17765700 | -0.88164600 |

**S3-F12. The coordinates of the optimized structures for the GS and ES of F12 compound**

**\* GS of F12 at PBE0/6-311++G(d,p)**

|   |             |             |             |
|---|-------------|-------------|-------------|
| O | 1.97554100  | 0.59506200  | 0.03851000  |
| O | -2.10843100 | 1.54458800  | 0.06146300  |
| O | 3.52432500  | 0.26753900  | -2.25961200 |
| O | 3.48366300  | -0.06574500 | 2.29003400  |
| O | 1.48066200  | -1.60242000 | -0.11440500 |
| O | -6.63570100 | 0.17067100  | 0.02760100  |
| O | -0.06057900 | 2.33525200  | 0.08456200  |
| N | 3.27497000  | 0.19928900  | 0.02052300  |
| C | 5.39029200  | -0.29844300 | -0.76510900 |
| C | 5.37656900  | -0.41164600 | 0.76222200  |
| C | 3.98983100  | 0.08462200  | -1.16507800 |
| C | 3.96895100  | -0.08829900 | 1.18904200  |
| C | -2.62419400 | -0.78980400 | -0.04336200 |
| C | -0.31046500 | -0.04685900 | -0.01731200 |
| C | -3.02624800 | 0.55424200  | 0.02152100  |
| C | -1.23999100 | -1.05150700 | -0.06156400 |
| C | 1.09631500  | -0.46879400 | -0.04010200 |
| C | -3.62177500 | -1.78539100 | -0.08374500 |
| C | -0.73942300 | 1.34336100  | 0.04617700  |
| C | -4.36106600 | 0.91884000  | 0.04681700  |
| C | -5.32097600 | -0.08864000 | 0.00609000  |
| C | -4.94968600 | -1.44582800 | -0.05989600 |
| H | 5.64752100  | -1.23581900 | -1.26222400 |
| H | 6.07678300  | 0.46755900  | -1.13171400 |
| H | 6.05632100  | 0.29001400  | 1.24999500  |
| H | 5.62484600  | -1.41280700 | 1.12007900  |
| H | -0.88911800 | -2.07784900 | -0.11058100 |
| H | -3.32374000 | -2.82721200 | -0.13334500 |
| H | -4.63549800 | 1.96675700  | 0.09716000  |
| H | -5.72769400 | -2.19915200 | -0.08971700 |
| H | -6.79885700 | 1.11877200  | 0.07724800  |

**\* ES of F12 at PBE0/6-311++G(d,p)**

|   |             |             |             |
|---|-------------|-------------|-------------|
| O | 1.98882200  | 0.62575800  | -0.02455300 |
| O | -2.11179200 | 1.54470400  | -0.03150200 |
| O | 3.50828900  | 0.02541200  | -2.28653700 |
| O | 3.51831800  | 0.20837700  | 2.27197200  |
| O | 1.49362000  | -1.59220100 | 0.05025000  |
| O | -6.64133400 | 0.19738200  | -0.01320200 |
| O | -0.06428800 | 2.31299100  | -0.05220100 |
| N | 3.28111300  | 0.21883100  | -0.01096200 |
| C | 5.38061700  | -0.40295800 | -0.75657700 |
| C | 5.38563900  | -0.33491200 | 0.77297900  |
| C | 3.98130400  | -0.04195700 | -1.18137400 |
| C | 3.98682400  | 0.05442100  | 1.17357500  |
| C | -2.62025600 | -0.82316800 | 0.02482600  |
| C | -0.29881100 | -0.06406300 | 0.00511800  |
| C | -3.03158000 | 0.55712800  | -0.01161800 |
| C | -1.24662400 | -1.11987500 | 0.03530800  |
| C | 1.09618300  | -0.44829400 | 0.01400300  |
| C | -3.64590100 | -1.80118600 | 0.04741600  |
| C | -0.73634700 | 1.30996600  | -0.02813100 |
| C | -4.35495200 | 0.93256600  | -0.02547600 |
| C | -5.33456900 | -0.06244500 | -0.00192400 |
| C | -4.96893700 | -1.43761400 | 0.03509300  |
| H | 5.61214700  | -1.39807700 | -1.14164300 |
| H | 6.07665200  | 0.29925900  | -1.21989200 |
| H | 6.07922100  | 0.41108600  | 1.16661900  |
| H | 5.62729700  | -1.28971900 | 1.24401500  |
| H | -0.89866000 | -2.14321900 | 0.06270900  |
| H | -3.36827900 | -2.84853800 | 0.07441900  |
| H | -4.61392300 | 1.98544300  | -0.05284600 |
| H | -5.75839800 | -2.18011500 | 0.05214600  |
| H | -6.81247400 | 1.14701700  | -0.04192200 |

**S3-F13. The coordinates of the optimized structures for the GS and ES of F13 compound**

**\* GS of F13 at PBE0/6-311++G(d,p)**

|   |             |             |             |
|---|-------------|-------------|-------------|
| O | -0.39539000 | -1.39619700 | 0.01100700  |
| O | -4.88383200 | 0.13732400  | -0.01326600 |
| O | 1.62456000  | -2.25274300 | 0.03210900  |
| O | 3.25757300  | 1.67146200  | 0.02709700  |

|   |             |             |             |
|---|-------------|-------------|-------------|
| N | 3.77888000  | -0.56965900 | -0.02343600 |
| N | 4.97152800  | -0.23797700 | -0.02766600 |
| N | 6.07629000  | -0.05698700 | -0.03417800 |
| C | -0.83824300 | 0.95178800  | 0.00685700  |
| C | -1.28282500 | -0.37793500 | 0.00528900  |
| C | 0.55414400  | 1.17030100  | 0.00954900  |
| C | -1.80751400 | 1.97778200  | 0.00241200  |
| C | -2.62923100 | -0.70957300 | -0.00171500 |
| C | -3.56121700 | 0.32607800  | -0.00634500 |
| C | 1.45621300  | 0.14027800  | 0.01128700  |
| C | -3.14252900 | 1.67547800  | -0.00379600 |
| C | 0.98111800  | -1.23576500 | 0.01848200  |
| C | 2.88286500  | 0.51496400  | 0.00818300  |
| C | -5.38768600 | -1.19341000 | -0.01755500 |
| H | 0.93766300  | 2.18619300  | 0.00828700  |
| H | -1.47910700 | 3.01170500  | 0.00375500  |
| H | -2.91487900 | -1.75279200 | -0.00301600 |
| H | -3.89949200 | 2.45071600  | -0.00724900 |
| H | -6.47143400 | -1.09851400 | -0.02342400 |
| H | -5.07168100 | -1.73287400 | 0.87966400  |
| H | -5.06181600 | -1.73076200 | -0.91251200 |

**\* ES of F13 at PBE0/6-311++G(d,p)**

|   |             |             |             |
|---|-------------|-------------|-------------|
| O | -0.39423600 | -1.39704200 | 0.00062600  |
| O | -4.88108700 | 0.11677200  | -0.00022800 |
| O | 1.62483100  | -2.23037900 | -0.00029200 |
| O | 3.26264700  | 1.67599300  | -0.00017300 |
| N | 3.78342600  | -0.57979300 | -0.00005600 |
| N | 4.97498000  | -0.26267300 | -0.00008500 |
| N | 6.08811700  | -0.08887500 | -0.00009800 |
| C | -0.83156300 | 0.97772000  | 0.00020100  |
| C | -1.28564100 | -0.38333600 | 0.00028400  |
| C | 0.55114700  | 1.22912900  | 0.00020500  |
| C | -1.82461400 | 1.99103100  | 0.00006300  |
| C | -2.61994800 | -0.72310500 | 0.00010100  |
| C | -3.56853800 | 0.30484900  | -0.00007100 |
| C | 1.47092500  | 0.15846900  | 0.00004300  |
| C | -3.15482800 | 1.67035300  | -0.00006900 |
| C | 0.98561100  | -1.20847800 | 0.00005600  |
| C | 2.88301500  | 0.50229800  | -0.00010400 |

|   |             |             |             |
|---|-------------|-------------|-------------|
| C | -5.40186500 | -1.20994300 | -0.00025700 |
| H | 0.93082700  | 2.24199100  | 0.00024900  |
| H | -1.51174600 | 3.02887300  | 0.00004700  |
| H | -2.89619700 | -1.76921400 | 0.00017400  |
| H | -3.92247200 | 2.43547100  | -0.00017400 |
| H | -6.48346200 | -1.10012200 | -0.00053500 |
| H | -5.08124900 | -1.74706300 | 0.89659600  |
| H | -5.08080900 | -1.74722100 | -0.89685400 |

**S3-F14. The coordinates of the optimized structures for the GS and ES of F14 compound**

**\* GS of F14 at PBE0/6-311++G(d,p)**

|   |             |             |             |
|---|-------------|-------------|-------------|
| O | 0.67438500  | 2.12757500  | -0.00017400 |
| O | 4.35990600  | -0.83237900 | 0.00012600  |
| O | -0.95589700 | 3.61420800  | -0.00030400 |
| C | 0.25410400  | -0.24592400 | 0.00002700  |
| C | 1.13234000  | 0.84857000  | -0.00005900 |
| C | 0.82301800  | -1.53344100 | 0.00014700  |
| C | -1.15002100 | 0.05873200  | -0.00001800 |
| C | 2.50941600  | 0.69256400  | -0.00003200 |
| C | 3.03679300  | -0.59213700 | 0.00008800  |
| C | 2.18651100  | -1.70846400 | 0.00017900  |
| C | -1.58760000 | 1.33576200  | -0.00012400 |
| C | -0.65768800 | 2.44443400  | -0.00018700 |
| H | 0.18366500  | -2.40724600 | 0.00021800  |
| H | 3.14570800  | 1.57060200  | -0.00010100 |
| H | 2.62125700  | -2.70091900 | 0.00027200  |
| H | 4.85532500  | -0.00651500 | 0.00006500  |
| H | -2.63822200 | 1.59036300  | -0.00016300 |
| C | -2.16147900 | -1.06126900 | 0.00005300  |
| F | -2.01881800 | -1.84610600 | 1.08046300  |
| F | -2.01881400 | -1.84624500 | -1.08025500 |
| F | -3.41872800 | -0.61370200 | 0.00002100  |

**\* ES of F14 at PBE0/6-311++G(d,p)**

|   |             |             |             |
|---|-------------|-------------|-------------|
| O | 0.74541100  | 2.14501800  | -0.00064500 |
| O | 4.32918000  | -0.90464300 | 0.00035500  |
| O | -0.86858700 | 3.66114800  | -0.00002700 |
| C | 0.23842400  | -0.24669600 | -0.00008500 |

|   |             |             |             |
|---|-------------|-------------|-------------|
| C | 1.15879500  | 0.86040500  | -0.00027700 |
| C | 0.79463100  | -1.55036700 | 0.00017000  |
| C | -1.16523100 | 0.04597700  | -0.00010200 |
| C | 2.52147600  | 0.66633100  | -0.00013500 |
| C | 3.03018100  | -0.63551800 | 0.00015700  |
| C | 2.15063300  | -1.75158000 | 0.00026300  |
| C | -1.55351900 | 1.39573800  | 0.00014700  |
| C | -0.62780700 | 2.46318000  | -0.00011000 |
| H | 0.13527000  | -2.40834000 | 0.00028800  |
| H | 3.18069800  | 1.52714500  | -0.00028900 |
| H | 2.57454900  | -2.74872700 | 0.00043800  |
| H | 4.85919100  | -0.09654000 | 0.00039800  |
| H | -2.59841800 | 1.67682100  | 0.00047700  |
| C | -2.17200300 | -1.03124100 | -0.00000100 |
| F | -2.06870100 | -1.85781200 | 1.07680400  |
| F | -2.06856300 | -1.85810100 | -1.07655600 |
| F | -3.42416000 | -0.55741200 | -0.00012900 |

**S3-F15. The coordinates of the optimized structures for the GS and ES of F15 compound**

**\* GS of F15 at PBE0/6-311++G(d,p)**

|   |             |             |             |
|---|-------------|-------------|-------------|
| O | 0.68212900  | 2.13188100  | 0.14030600  |
| O | -0.65554800 | 3.88437400  | 0.20815400  |
| O | -3.97769600 | -2.17638900 | -0.03042200 |
| O | -2.68609400 | -1.17995400 | 1.50158200  |
| C | -0.13188800 | -0.07749200 | -0.34927900 |
| C | -1.45977300 | 0.46455300  | -0.47004100 |
| C | 0.90965000  | 0.80509200  | -0.04063800 |
| C | 2.52503400  | -0.95669200 | -0.07919700 |
| C | 2.22898500  | 0.38998100  | 0.09671800  |
| C | 0.20544000  | -1.43320400 | -0.52106600 |
| C | 1.50117700  | -1.86985100 | -0.39080300 |
| C | -2.62014800 | -0.42467300 | -0.79762800 |
| C | -1.64985500 | 1.79496900  | -0.29289800 |
| C | -0.56765400 | 2.69009900  | 0.02792100  |
| C | 4.83513300  | -0.60221100 | 0.33833500  |
| C | -3.06655300 | -1.28187300 | 0.36318800  |
| H | 2.98323700  | 1.12798500  | 0.33517800  |
| H | -0.56695800 | -2.15445900 | -0.76312500 |

|   |             |             |             |
|---|-------------|-------------|-------------|
| H | 1.75735400  | -2.91434000 | -0.52437500 |
| H | -2.39856200 | -1.07887300 | -1.64624100 |
| H | -3.48395200 | 0.17598600  | -1.09737600 |
| H | -2.62910600 | 2.24932600  | -0.37985500 |
| H | 4.95616300  | 0.16267200  | -0.43466000 |
| H | 5.72523900  | -1.22734200 | 0.37319800  |
| H | 4.68494300  | -0.12590300 | 1.31186000  |
| H | -4.26052600 | -2.68169200 | 0.74518400  |
| O | 3.75906700  | -1.47560500 | 0.02694800  |

**\* ES of F15 at PBE0/6-311++G(d,p)**

|   |             |             |             |
|---|-------------|-------------|-------------|
| O | 0.74752800  | 2.14584900  | 0.10737000  |
| O | -0.60094100 | 3.89967500  | 0.23060400  |
| O | -4.13465100 | -2.05573400 | -0.03951800 |
| O | -2.74601500 | -1.19261800 | 1.48674100  |
| C | -0.13249500 | -0.08952400 | -0.34808000 |
| C | -1.44480000 | 0.42630800  | -0.48903800 |
| C | 0.95034400  | 0.81876800  | -0.04847200 |
| C | 2.54362200  | -0.97396300 | -0.06867100 |
| C | 2.25110400  | 0.38839000  | 0.08599000  |
| C | 0.21034600  | -1.46505700 | -0.48068900 |
| C | 1.50370400  | -1.89909600 | -0.35388700 |
| C | -2.60683300 | -0.44159500 | -0.81724500 |
| C | -1.61476500 | 1.81212300  | -0.26973600 |
| C | -0.55538500 | 2.69143400  | 0.02857600  |
| C | 4.86718800  | -0.64810000 | 0.32578400  |
| C | -3.14011500 | -1.24785800 | 0.34888900  |
| H | 3.01711500  | 1.12000500  | 0.30699100  |
| H | -0.56875100 | -2.18705600 | -0.69242700 |
| H | 1.76160300  | -2.94632100 | -0.46134600 |
| H | -2.38233000 | -1.14950000 | -1.62507800 |
| H | -3.44177800 | 0.16283500  | -1.18755100 |
| H | -2.59870200 | 2.26432700  | -0.32550600 |
| H | 4.99391000  | 0.09932600  | -0.46234400 |
| H | 5.73604100  | -1.30084600 | 0.36060600  |
| H | 4.73170000  | -0.15573100 | 1.29272300  |
| H | -4.44888000 | -2.54179300 | 0.73610900  |
| O | 3.76015100  | -1.49669900 | 0.03696600  |

**S3-F16. The coordinates of the optimized structures for the GS and ES of F16 compound**

**\* GS of F16 at PBE0/6-311++G(d,p)**

|   |             |             |             |
|---|-------------|-------------|-------------|
| O | -1.86462100 | -1.51458000 | -0.24225300 |
| O | -3.91148400 | -2.32324700 | -0.37834300 |
| N | 2.66568200  | -0.12629400 | 0.00493900  |
| C | 1.33900400  | 0.17593300  | 0.03892000  |
| C | 3.69200900  | 0.87063500  | 0.27120000  |
| C | 3.13693400  | -1.46979500 | -0.29338400 |
| C | 0.35401500  | -0.81950200 | -0.11792900 |
| C | -1.44227900 | 0.82777600  | 0.10704300  |
| C | -0.98624700 | -0.48545100 | -0.08491800 |
| C | 0.88862600  | 1.51207700  | 0.23141100  |
| C | -0.45129900 | 1.81312200  | 0.26368700  |
| C | 4.12809300  | 1.64232400  | -0.96741300 |
| C | 3.24058000  | -2.36600300 | 0.93416400  |
| C | -2.85630500 | 1.06649000  | 0.12926900  |
| C | -3.70126100 | 0.01033200  | -0.03385000 |
| C | -3.22774800 | -1.33038500 | -0.22675400 |
| H | 3.34449300  | 1.55262100  | 1.05159000  |
| H | 4.54887600  | 0.34264100  | 0.69949200  |
| H | 2.48967300  | -1.92127700 | -1.05037800 |
| H | 4.11955600  | -1.37027300 | -0.76341800 |
| H | 0.60832400  | -1.86257500 | -0.24803900 |
| H | 1.60207300  | 2.31814800  | 0.33791300  |
| H | -0.74848100 | 2.84640400  | 0.40725000  |
| H | 4.51966500  | 0.96404300  | -1.73087400 |
| H | 3.29419000  | 2.19846800  | -1.40373300 |
| H | 4.91723700  | 2.35469500  | -0.71033800 |
| H | 3.92826800  | -1.93937600 | 1.66993800  |
| H | 2.26789600  | -2.49730400 | 1.41532900  |
| H | 3.61745200  | -3.35272100 | 0.65039500  |
| H | -4.77694300 | 0.13663800  | -0.02450400 |
| C | -3.38638300 | 2.44905200  | 0.32925000  |
| H | -3.04244300 | 2.86276800  | 1.28229500  |
| H | -3.03057000 | 3.11926400  | -0.45943200 |
| H | -4.47663300 | 2.45489200  | 0.32253700  |

**\* ES of F16 at PBE0/6-311++G(d,p)**



|   |             |             |             |
|---|-------------|-------------|-------------|
| O | -1.85280000 | -1.53537400 | -0.22826400 |
| O | -3.91350300 | -2.35698600 | -0.38766300 |
| N | 2.66118600  | -0.12915000 | 0.00559300  |
| C | 1.33640300  | 0.19891100  | 0.03505000  |
| C | 3.69799200  | 0.85418200  | 0.27225700  |
| C | 3.12622900  | -1.47493400 | -0.29137100 |
| C | 0.34455200  | -0.80990500 | -0.11921700 |
| C | -1.44714100 | 0.83827300  | 0.10598300  |
| C | -0.99337600 | -0.49388300 | -0.08087800 |
| C | 0.90266300  | 1.53347700  | 0.22016200  |
| C | -0.44472000 | 1.83251500  | 0.24886300  |
| C | 4.13572800  | 1.60851500  | -0.98089100 |
| C | 3.24174700  | -2.35045100 | 0.95399500  |
| C | -2.85718400 | 1.09520700  | 0.13662400  |
| C | -3.70202600 | -0.00947200 | -0.03820400 |
| C | -3.24976700 | -1.33144300 | -0.22508300 |
| H | 3.34940500  | 1.54470800  | 1.04273200  |
| H | 4.54864600  | 0.31344400  | 0.69495100  |
| H | 2.46813400  | -1.93241400 | -1.03189300 |
| H | 4.10645200  | -1.37398800 | -0.76469400 |
| H | 0.60855800  | -1.85045300 | -0.24974100 |
| H | 1.61797400  | 2.33835700  | 0.32127100  |
| H | -0.74824700 | 2.86416000  | 0.38342000  |
| H | 4.52529100  | 0.92136900  | -1.73602500 |
| H | 3.30453600  | 2.16695500  | -1.41712800 |
| H | 4.92862600  | 2.31355500  | -0.71880700 |
| H | 3.92764900  | -1.90914000 | 1.68130300  |
| H | 2.26964000  | -2.48587300 | 1.43354600  |
| H | 3.62918100  | -3.33225000 | 0.67010900  |
| H | -4.77942500 | 0.11914800  | -0.03443100 |
| C | -3.37642700 | 2.47456800  | 0.33629700  |
| H | -3.03211600 | 2.91010300  | 1.28528200  |
| H | -3.04199100 | 3.15976400  | -0.45617700 |
| H | -4.46821600 | 2.48213400  | 0.34302300  |

**S3-F17. The coordinates of the optimized structures for the GS and ES of F17 compound**

**\* GS of F17 at PBE0/6-311++G(d,p)**

|   |             |            |             |
|---|-------------|------------|-------------|
| S | -3.63196800 | 1.47390000 | -0.17590800 |
|---|-------------|------------|-------------|

|   |             |             |             |
|---|-------------|-------------|-------------|
| O | 0.87114700  | 1.60583200  | -0.19183700 |
| O | -1.09387000 | 2.58880700  | -0.30685400 |
| N | 5.26918000  | -0.16658400 | 0.02783000  |
| N | -3.13455600 | -1.06045100 | 0.11640200  |
| C | 3.92756200  | -0.35017000 | 0.04931200  |
| C | 6.20753000  | -1.25632400 | 0.26679000  |
| C | 5.86258900  | 1.13820700  | -0.23371400 |
| C | 1.11180400  | -0.75983200 | 0.09138800  |
| C | 1.67776500  | 0.51867300  | -0.06383000 |
| C | 3.03618600  | 0.73842800  | -0.08553900 |
| C | 3.36342100  | -1.65357700 | 0.20622700  |
| C | 2.00831500  | -1.84101200 | 0.22572700  |
| C | -0.28859800 | -0.86941700 | 0.10224900  |
| C | -1.09845200 | 0.23280400  | -0.03010300 |
| C | 6.58207400  | -2.01974400 | -0.99608800 |
| C | 6.04465300  | 1.98248200  | 1.02042500  |
| C | -2.54625300 | 0.09271100  | -0.01563800 |
| C | -0.49855900 | 1.53902700  | -0.18353600 |
| C | -4.97873700 | 0.38300800  | -0.05115800 |
| C | -4.50127500 | -0.93438000 | 0.10060300  |
| C | -6.34303300 | 0.66547700  | -0.08446100 |
| C | -5.41465700 | -1.98916700 | 0.22085900  |
| C | -7.23122400 | -0.39265500 | 0.03629700  |
| C | -6.76931500 | -1.70842700 | 0.18765400  |
| H | 7.10201100  | -0.81330000 | 0.71318500  |
| H | 5.79954300  | -1.92895900 | 1.02478200  |
| H | 6.83224800  | 0.95937000  | -0.70615500 |
| H | 5.26090000  | 1.66671500  | -0.97741700 |
| H | 3.38520600  | 1.75663500  | -0.18684600 |
| H | 4.00844800  | -2.51703700 | 0.29362500  |
| H | 1.60536200  | -2.84243000 | 0.33931000  |
| H | -0.75112200 | -1.84480200 | 0.21852000  |
| H | 5.70742800  | -2.49268300 | -1.45014700 |
| H | 7.03008300  | -1.35194800 | -1.73717600 |
| H | 7.30987400  | -2.80092000 | -0.75999600 |
| H | 5.08697300  | 2.19319200  | 1.50322700  |
| H | 6.68512000  | 1.47121700  | 1.74447600  |
| H | 6.51564600  | 2.93562500  | 0.76496000  |
| H | -6.70229900 | 1.68197000  | -0.20140200 |
| H | -5.05031200 | -3.00428100 | 0.33761800  |

|   |             |             |            |
|---|-------------|-------------|------------|
| H | -8.29826000 | -0.19818400 | 0.01325400 |
| H | -7.48673000 | -2.51711000 | 0.27983700 |

**\* ES of F17 at PBE0/6-311++G(d,p)**

|   |             |             |             |
|---|-------------|-------------|-------------|
| S | -3.62861400 | 1.49609200  | -0.18094000 |
| O | 0.86168600  | 1.60017300  | -0.18512000 |
| O | -1.10121500 | 2.57771800  | -0.30570200 |
| N | 5.26599100  | -0.15365300 | 0.02731900  |
| N | -3.13623700 | -1.06649200 | 0.11927200  |
| C | 3.92390000  | -0.36081900 | 0.04802000  |
| C | 6.21800200  | -1.22867800 | 0.26636400  |
| C | 5.84230500  | 1.15735200  | -0.23248900 |
| C | 1.09440300  | -0.79345000 | 0.09187100  |
| C | 1.66213200  | 0.49748900  | -0.05974600 |
| C | 3.01495800  | 0.72197700  | -0.08311500 |
| C | 3.37404800  | -1.66804000 | 0.19998800  |
| C | 2.01900500  | -1.86686500 | 0.21852900  |
| C | -0.29801700 | -0.93230300 | 0.10782500  |
| C | -1.11825100 | 0.22177800  | -0.02920300 |
| C | 6.60242000  | -1.98198300 | -1.00248100 |
| C | 6.01936200  | 1.99576200  | 1.02907900  |
| C | -2.52408000 | 0.11255400  | -0.01798700 |
| C | -0.50959300 | 1.52378600  | -0.18064400 |
| C | -4.96671800 | 0.39591200  | -0.05408400 |
| C | -4.47827200 | -0.93324700 | 0.10171900  |
| C | -6.32753400 | 0.67186200  | -0.08766600 |
| C | -5.40521800 | -1.99101600 | 0.22391200  |
| C | -7.21784600 | -0.38918300 | 0.03508400  |
| C | -6.75488300 | -1.70844400 | 0.18947500  |
| H | 7.10691100  | -0.77280400 | 0.71086400  |
| H | 5.81487900  | -1.90978100 | 1.01896700  |
| H | 6.81369300  | 0.98977800  | -0.70551100 |
| H | 5.23028600  | 1.68301700  | -0.96888500 |
| H | 3.35587700  | 1.74344000  | -0.18409200 |
| H | 4.02573500  | -2.52734200 | 0.28378300  |
| H | 1.62739100  | -2.87295300 | 0.32734200  |
| H | -0.76341700 | -1.90195800 | 0.22267600  |
| H | 5.73338100  | -2.46465400 | -1.45613500 |
| H | 7.04362800  | -1.30655800 | -1.74009800 |
| H | 7.33952700  | -2.75295700 | -0.76271300 |

|   |             |             |             |
|---|-------------|-------------|-------------|
| H | 5.05992400  | 2.19563500  | 1.51231900  |
| H | 6.66668100  | 1.48742300  | 1.74842800  |
| H | 6.48152500  | 2.95249000  | 0.77160000  |
| H | -6.69026900 | 1.68694800  | -0.20636600 |
| H | -5.04094800 | -3.00581700 | 0.34258400  |
| H | -8.28491700 | -0.19533400 | 0.01134800  |
| H | -7.47485000 | -2.51482000 | 0.28264200  |

**S3-F18. The coordinates of the optimized structures for the GS and ES of F18 compound**

**\* GS of F18 at PBE0/6-311++G(d,p)**

|   |             |             |             |
|---|-------------|-------------|-------------|
| O | -0.67650700 | 1.66101000  | -0.05757500 |
| O | 1.26950000  | 2.67976800  | -0.04175300 |
| N | -5.07037500 | -0.14303100 | 0.00051000  |
| N | 3.37306700  | -0.85706100 | 0.65721900  |
| N | 3.61669200  | 0.90517000  | -0.69168700 |
| C | -3.72543900 | -0.32150100 | 0.00509900  |
| C | -0.90864300 | -0.71772900 | 0.01927200  |
| C | -6.00168000 | -1.25556300 | 0.13348600  |
| C | -5.66928300 | 1.17783500  | -0.13066500 |
| C | -1.47820600 | 0.56431700  | -0.02439400 |
| C | -2.83957500 | 0.77815200  | -0.02894000 |
| C | 1.30465200  | 0.29060700  | -0.02659400 |
| C | -3.15486100 | -1.62938600 | 0.04085200  |
| C | 0.49850300  | -0.81581900 | 0.01205800  |
| C | -1.79679000 | -1.81031600 | 0.04797500  |
| C | 2.75923800  | 0.16030500  | -0.03062500 |
| C | 4.72243400  | -0.75573200 | 0.42745600  |
| C | 0.70220600  | 1.61391200  | -0.04751100 |
| C | 4.85361300  | 0.35895900  | -0.42674900 |
| C | -6.37120300 | -1.89841800 | -1.19644400 |
| C | -5.84928400 | 1.89587500  | 1.20033800  |
| C | 5.81534800  | -1.49703500 | 0.86687100  |
| C | 6.12029500  | 0.74758700  | -0.87137900 |
| C | 7.06376300  | -1.09167500 | 0.41640900  |
| C | 7.21373500  | 0.01222800  | -0.44096100 |
| H | -6.89977500 | -0.86347300 | 0.61888600  |
| H | -5.59027000 | -1.99541900 | 0.82435300  |
| H | -5.07293800 | 1.77942000  | -0.82151300 |

|   |             |             |             |
|---|-------------|-------------|-------------|
| H | -6.64044200 | 1.04304700  | -0.61472500 |
| H | -3.19282300 | 1.79996500  | -0.04011300 |
| H | -3.79443900 | -2.50137400 | 0.04502400  |
| H | 0.94298500  | -1.80766500 | 0.01413300  |
| H | -1.38967500 | -2.81645800 | 0.06895400  |
| H | 2.92363300  | -1.49570300 | 1.29424100  |
| H | -7.09344300 | -2.70393600 | -1.03706100 |
| H | -5.49299800 | -2.31933700 | -1.69295700 |
| H | -6.82383800 | -1.16593500 | -1.87067700 |
| H | -6.48696700 | 1.31499800  | 1.87266000  |
| H | -4.89025500 | 2.05899700  | 1.69874000  |
| H | -6.32198900 | 2.86903600  | 1.04148800  |
| H | 5.70036200  | -2.34990200 | 1.52690000  |
| H | 6.23631900  | 1.60062200  | -1.53172000 |
| H | 7.94485200  | -1.64042000 | 0.73240400  |
| H | 8.20914100  | 0.29215400  | -0.77001000 |

**\* ES of F18 at PBE0/6-311++G(d,p)**

|   |             |             |             |
|---|-------------|-------------|-------------|
| O | -0.66904000 | 1.63899700  | -0.22506200 |
| O | 1.26438600  | 2.65602000  | -0.37423700 |
| N | -5.07324100 | -0.11826000 | 0.03899300  |
| N | 3.34998000  | -1.07985900 | 0.13551600  |
| N | 3.66901000  | 1.12532000  | -0.16786900 |
| C | -3.72816800 | -0.32267400 | 0.04326700  |
| C | -0.89745500 | -0.74611600 | 0.05993600  |
| C | -6.01851600 | -1.19498100 | 0.29225900  |
| C | -5.65488100 | 1.19115300  | -0.21306400 |
| C | -1.46808500 | 0.54303300  | -0.08792600 |
| C | -2.82300200 | 0.76187700  | -0.09724200 |
| C | 1.33048100  | 0.27903000  | -0.06876300 |
| C | -3.17393100 | -1.62752400 | 0.18644400  |
| C | 0.49505200  | -0.87372100 | 0.06748900  |
| C | -1.81666500 | -1.82286000 | 0.19221500  |
| C | 2.74124600  | 0.15919200  | -0.04114900 |
| C | 4.69790600  | -0.89712500 | 0.12246600  |
| C | 0.72343900  | 1.58226000  | -0.23147200 |
| C | 4.86630000  | 0.50649500  | -0.07216900 |
| C | -6.41900400 | -1.95286100 | -0.96898300 |
| C | -5.81599400 | 2.03114800  | 1.04971900  |
| C | 5.77153000  | -1.77135900 | 0.25411400  |

|   |             |             |             |
|---|-------------|-------------|-------------|
| C | 6.16620800  | 1.04335900  | -0.13666500 |
| C | 7.04024000  | -1.21180400 | 0.18634300  |
| C | 7.23178700  | 0.17487200  | -0.00650900 |
| H | -6.90303900 | -0.74182600 | 0.74853300  |
| H | -5.60329700 | -1.87399900 | 1.04051900  |
| H | -5.05390100 | 1.71780900  | -0.95800900 |
| H | -6.63261500 | 1.02281500  | -0.67290300 |
| H | -3.16784900 | 1.78241000  | -0.19537800 |
| H | -3.82221500 | -2.48919500 | 0.27389200  |
| H | 0.91458600  | -1.86517300 | 0.17430500  |
| H | -1.42272700 | -2.82884800 | 0.29591600  |
| H | 2.88508800  | -1.96281800 | 0.26680900  |
| H | -7.14957500 | -2.72655700 | -0.71771500 |
| H | -5.55478200 | -2.43282300 | -1.43465200 |
| H | -6.87352800 | -1.28057200 | -1.70147800 |
| H | -6.45305400 | 1.52276300  | 1.77827300  |
| H | -4.85020700 | 2.23184900  | 1.51986700  |
| H | -6.28228700 | 2.98766700  | 0.79851300  |
| H | 5.62802600  | -2.83579900 | 0.40230700  |
| H | 6.31336600  | 2.10771300  | -0.28419200 |
| H | 7.90895700  | -1.85435900 | 0.28355600  |
| H | 8.24513600  | 0.56003400  | -0.05211800 |

-----

**S3-F19. The coordinates of the optimized structures for the GS and ES of F19 compound**

**\* GS of F19 at PBE0/6-311++G(d,p)**

|   |             |             |             |
|---|-------------|-------------|-------------|
| O | -0.80155900 | 1.67349200  | 0.06936200  |
| O | 1.15786300  | 2.66566200  | 0.19360000  |
| N | -5.20424600 | -0.10598400 | -0.05097200 |
| N | 3.34743200  | -0.61112700 | 0.73222000  |
| N | 3.38404100  | 0.79819200  | -1.01328700 |
| C | -3.86023200 | -0.29134100 | -0.06874100 |
| C | -1.04574100 | -0.70148700 | -0.10880700 |
| C | -6.14179200 | -1.22093300 | -0.02704300 |
| C | -5.79609100 | 1.22453800  | -0.05140100 |
| C | -1.60794200 | 0.58117400  | -0.01378300 |
| C | -2.96834000 | 0.80108000  | 0.00952900  |
| C | 1.16784300  | 0.29534800  | -0.06070100 |

|   |             |             |             |
|---|-------------|-------------|-------------|
| C | -3.29702200 | -1.59861100 | -0.17028200 |
| C | 0.36254300  | -0.80644400 | -0.13631300 |
| C | -1.93967200 | -1.78616000 | -0.18835400 |
| C | 2.62950600  | 0.18958500  | -0.12509500 |
| C | 4.66407400  | -0.50841000 | 0.34917100  |
| C | 0.57473000  | 1.61329300  | 0.06992500  |
| C | 4.66755400  | 0.38285500  | -0.74223600 |
| C | -6.52298100 | -1.72248000 | -1.41328200 |
| C | -5.97205300 | 1.81053200  | 1.34328900  |
| C | 5.82827300  | -1.08976000 | 0.84643000  |
| C | 5.87267000  | 0.70851500  | -1.37036400 |
| C | 7.01410200  | -0.75187400 | 0.20980100  |
| C | 7.03576100  | 0.13331700  | -0.88223300 |
| H | -7.03465800 | -0.87527600 | 0.50137900  |
| H | -5.73131700 | -2.02992600 | 0.58196800  |
| H | -5.19681300 | 1.88747800  | -0.68088300 |
| H | -6.76818100 | 1.14268700  | -0.54544400 |
| H | -3.31631000 | 1.82005600  | 0.10808700  |
| H | -3.94141000 | -2.46304900 | -0.25342100 |
| H | 0.80727800  | -1.79311700 | -0.23701700 |
| H | -1.53791100 | -2.79102600 | -0.27387800 |
| H | -7.25097200 | -2.53450900 | -1.33230300 |
| H | -5.65092800 | -2.09762600 | -1.95527800 |
| H | -6.97315600 | -0.92194000 | -2.00704300 |
| H | -6.61130500 | 1.16949100  | 1.95688500  |
| H | -5.01207100 | 1.92156200  | 1.85409000  |
| H | -6.44144300 | 2.79616100  | 1.28009000  |
| H | 5.81569900  | -1.77626100 | 1.68608700  |
| H | 5.89043500  | 1.39284000  | -2.21230400 |
| H | 7.94599700  | -1.18189800 | 0.56189200  |
| H | 7.98589300  | 0.36888300  | -1.35053800 |
| C | 2.87259100  | -1.36970800 | 1.86973200  |
| H | 1.87090000  | -1.03610900 | 2.13538900  |
| H | 2.84817200  | -2.43956000 | 1.64659700  |
| H | 3.53438700  | -1.19780600 | 2.72077200  |

**\* ES of F19 at PBE0/6-311++G(d,p)**

|   |             |             |             |
|---|-------------|-------------|-------------|
| O | -0.80667800 | 1.69736400  | 0.05995500  |
| O | 1.12823600  | 2.72072100  | 0.19334000  |
| N | -5.20455400 | -0.09100700 | -0.05733200 |

|   |             |             |             |
|---|-------------|-------------|-------------|
| N | 3.31833300  | -0.85904800 | 0.47539700  |
| N | 3.44086600  | 1.14069400  | -0.57292400 |
| C | -3.85757600 | -0.29226200 | -0.05613200 |
| C | -1.02533500 | -0.70672800 | -0.04371500 |
| C | -6.14955700 | -1.19551300 | -0.00904300 |
| C | -5.78667800 | 1.24081600  | -0.11022400 |
| C | -1.59969700 | 0.58849500  | 0.00885900  |
| C | -2.95573700 | 0.80233300  | 0.00714400  |
| C | 1.19345700  | 0.33242700  | 0.02410400  |
| C | -3.30008500 | -1.60056500 | -0.12533000 |
| C | 0.37091200  | -0.83183500 | -0.03817400 |
| C | -1.94089200 | -1.79105900 | -0.12328200 |
| C | 2.61534200  | 0.24636800  | -0.00445000 |
| C | 4.63663500  | -0.64476100 | 0.18537200  |
| C | 0.58615100  | 1.64055400  | 0.08474600  |
| C | 4.68112200  | 0.61434700  | -0.47555400 |
| C | -6.52389700 | -1.72854000 | -1.38824500 |
| C | -5.97999300 | 1.86893800  | 1.26637700  |
| C | 5.77998600  | -1.39458700 | 0.44296000  |
| C | 5.91600700  | 1.12438400  | -0.91713300 |
| C | 6.98596800  | -0.86385300 | 0.00228800  |
| C | 7.05028300  | 0.37533400  | -0.67058800 |
| H | -7.04458600 | -0.82696100 | 0.50010400  |
| H | -5.74503400 | -1.99137100 | 0.62036400  |
| H | -5.17207300 | 1.88034800  | -0.74799600 |
| H | -6.75342100 | 1.14653500  | -0.61256400 |
| H | -3.30432100 | 1.82462000  | 0.06707300  |
| H | -3.94527500 | -2.46576000 | -0.20012600 |
| H | 0.81226500  | -1.80967700 | -0.17363100 |
| H | -1.54347300 | -2.79907300 | -0.18504000 |
| H | -7.25691800 | -2.53321900 | -1.28500500 |
| H | -5.64986900 | -2.12308400 | -1.91216400 |
| H | -6.96696900 | -0.94168800 | -2.00441600 |
| H | -6.63040500 | 1.25022000  | 1.89029200  |
| H | -5.02575400 | 1.99384900  | 1.78387900  |
| H | -6.44556000 | 2.85242800  | 1.15940600  |
| H | 5.73942600  | -2.35162500 | 0.95099800  |
| H | 5.96431100  | 2.08006300  | -1.42785000 |
| H | 7.90276200  | -1.41769600 | 0.17508700  |
| H | 8.01744400  | 0.74354200  | -0.99667300 |



|   |            |             |            |
|---|------------|-------------|------------|
| C | 2.86086800 | -1.90087100 | 1.37470100 |
| H | 1.94816500 | -1.58063000 | 1.87373700 |
| H | 2.67228200 | -2.83710900 | 0.84273100 |
| H | 3.62831800 | -2.07339600 | 2.13139100 |

**S3-F20. The coordinates of the optimized structures for the GS and ES of F20 compound**

**\* GS of F20 at PBE0/6-311++G(d,p)**

|   |             |             |             |
|---|-------------|-------------|-------------|
| O | 0.63811500  | 2.13895300  | -0.00017300 |
| O | -1.00724300 | 3.60874300  | -0.00029300 |
| C | 0.24377700  | -0.23950100 | 0.00002300  |
| C | 1.11676000  | 0.86462700  | -0.00004100 |
| C | 0.83514900  | -1.51950300 | 0.00014500  |
| C | -1.15624200 | 0.04864400  | -0.00004100 |
| C | 2.49004300  | 0.72864300  | 0.00001800  |
| C | 3.05787600  | -0.55227900 | 0.00014100  |
| C | 2.19703300  | -1.67723800 | 0.00020200  |
| C | -1.61394300 | 1.32344500  | -0.00018000 |
| C | -0.69916200 | 2.43903900  | -0.00028100 |
| H | 0.20885400  | -2.40316900 | 0.00019600  |
| H | 3.11041700  | 1.61769200  | -0.00003400 |
| H | 2.62642900  | -2.67330100 | 0.00029500  |
| H | -2.66788200 | 1.56263500  | -0.00021900 |
| C | -2.15445400 | -1.08265700 | 0.00003200  |
| F | -2.00527900 | -1.86748200 | 1.08059300  |
| F | -2.00503400 | -1.86783100 | -1.08024100 |
| F | -3.41825600 | -0.65100100 | -0.00017900 |
| N | 4.40000100  | -0.71962800 | 0.00020100  |
| H | 4.80700600  | -1.63855800 | 0.00027600  |
| H | 5.02429700  | 0.06802800  | 0.00014500  |

**\* ES of F20 at PBE0/6-311++G(d,p)**

|   |             |             |             |
|---|-------------|-------------|-------------|
| O | 0.69549400  | 2.15738000  | -0.00028100 |
| O | -0.94291100 | 3.65598700  | -0.00058900 |
| C | 0.24392500  | -0.23653200 | 0.00017500  |
| C | 1.12600000  | 0.86998300  | -0.00004300 |
| C | 0.82416100  | -1.53083400 | 0.00041600  |
| C | -1.18062600 | 0.03710500  | 0.00004000  |
| C | 2.49408300  | 0.70264900  | -0.00003900 |

|   |             |             |             |
|---|-------------|-------------|-------------|
| C | 3.04996000  | -0.60013100 | 0.00019700  |
| C | 2.18213000  | -1.72239900 | 0.00042500  |
| C | -1.58180300 | 1.37325600  | 0.00016500  |
| C | -0.67457100 | 2.46000500  | 0.00032800  |
| H | 0.17607400  | -2.39813900 | 0.00057300  |
| H | 3.13494800  | 1.57703200  | -0.00021200 |
| H | 2.59885500  | -2.72297700 | 0.00058400  |
| H | -2.63131100 | 1.63907800  | 0.00013100  |
| C | -2.16360400 | -1.05399600 | -0.00012500 |
| F | -2.04700200 | -1.88561200 | 1.07677400  |
| F | -2.04655800 | -1.88565700 | -1.07692600 |
| F | -3.42764200 | -0.60967400 | -0.00038300 |
| N | 4.38137400  | -0.76006500 | 0.00017000  |
| H | 4.79740200  | -1.67933400 | 0.00027600  |
| H | 5.00664700  | 0.03170300  | 0.00000400  |

**S3-F21. The coordinates of the optimized structures for the GS and ES of F21 compound**

**\* GS of F21 at PBE0/6-311++G(d,p)**

|   |             |             |             |
|---|-------------|-------------|-------------|
| O | 0.64099500  | 1.34184100  | -0.08652600 |
| O | 2.73304300  | 1.99841300  | -0.10867300 |
| O | 4.65482500  | 0.04782700  | 0.04496000  |
| O | 3.96355500  | -2.07842700 | -0.01690600 |
| N | -4.00318500 | 0.36875000  | -0.05130100 |
| C | -2.71127300 | -0.05239200 | -0.06662400 |
| C | -4.33131100 | 1.77572800  | -0.22436900 |
| C | -1.65471900 | 0.89624400  | -0.06792400 |
| C | -5.11833100 | -0.56254400 | -0.14228400 |
| C | -2.41346700 | -1.45715300 | -0.07132500 |
| C | -1.92820700 | 2.37474100  | -0.06251200 |
| C | -3.32056100 | 2.66326900  | 0.47123600  |
| C | -4.79315200 | -1.88875400 | 0.51164400  |
| C | -3.53417500 | -2.45989300 | -0.11595700 |
| C | -0.35693600 | 0.42137200  | -0.06960900 |
| C | -1.10718200 | -1.86606200 | -0.05077300 |
| C | -0.03774700 | -0.94780000 | -0.05357500 |
| C | 1.31766000  | -1.30094500 | -0.03570800 |
| C | 2.32890800  | -0.36769900 | -0.03905300 |
| C | 1.99548600  | 1.04228300  | -0.07764500 |

|   |             |             |             |
|---|-------------|-------------|-------------|
| C | 3.71094600  | -0.88783700 | -0.00579700 |
| C | 6.01496200  | -0.42214700 | 0.08286400  |
| C | 6.91412700  | 0.78629200  | 0.12328800  |
| H | -5.33057400 | 1.93238100  | 0.18874900  |
| H | -4.38032400 | 2.01990300  | -1.29607800 |
| H | -5.39288800 | -0.71667700 | -1.19663400 |
| H | -5.97517600 | -0.09273100 | 0.34791000  |
| H | -1.16935100 | 2.88611500  | 0.53458000  |
| H | -1.83219500 | 2.77061200  | -1.08192800 |
| H | -3.35835200 | 2.47397800  | 1.54947000  |
| H | -3.58586800 | 3.71139500  | 0.31235000  |
| H | -5.63829000 | -2.56983200 | 0.38455900  |
| H | -4.64693800 | -1.73999300 | 1.58716800  |
| H | -3.74374200 | -2.72522600 | -1.16061200 |
| H | -3.22359800 | -3.38102400 | 0.38433000  |
| H | -0.88092200 | -2.92874100 | -0.04261100 |
| H | 1.59787000  | -2.35013500 | -0.01470800 |
| H | 6.14289700  | -1.05473200 | 0.96529100  |
| H | 6.19828100  | -1.03714500 | -0.80210800 |
| H | 7.95726900  | 0.46103200  | 0.15369500  |
| H | 6.77578400  | 1.40947300  | -0.76353700 |
| H | 6.71892000  | 1.39265200  | 1.01112000  |

**\* ES of F21 at PBE0/6-311++G(d,p)**

|   |             |             |             |
|---|-------------|-------------|-------------|
| O | 0.64358800  | 1.33204900  | -0.09287000 |
| O | 2.73882000  | 1.98035200  | -0.10457100 |
| O | 4.66675600  | 0.06597400  | 0.04172100  |
| O | 3.98343300  | -2.07224500 | 0.00103000  |
| N | -4.01322200 | 0.39131600  | -0.06396900 |
| C | -2.72123600 | -0.05819100 | -0.06642500 |
| C | -4.31291300 | 1.79914900  | -0.23890000 |
| C | -1.64770600 | 0.88518600  | -0.05734500 |
| C | -5.13191600 | -0.52810300 | -0.14865600 |
| C | -2.44442800 | -1.45912000 | -0.07085300 |
| C | -1.90677900 | 2.36120500  | -0.03817100 |
| C | -3.30100900 | 2.66886900  | 0.47764800  |
| C | -4.82615800 | -1.85479400 | 0.51459200  |
| C | -3.57188300 | -2.44875700 | -0.10177700 |
| C | -0.35098200 | 0.39975900  | -0.07174300 |
| C | -1.13203300 | -1.87995700 | -0.05816900 |

|   |             |             |             |
|---|-------------|-------------|-------------|
| C | -0.04608200 | -0.97525500 | -0.06014300 |
| C | 1.32204800  | -1.36160800 | -0.04158300 |
| C | 2.33570900  | -0.38782700 | -0.03702600 |
| C | 2.00405200  | 1.01450300  | -0.07611800 |
| C | 3.71605800  | -0.87675400 | 0.00043100  |
| C | 6.02111200  | -0.40622000 | 0.07980500  |
| C | 6.92545300  | 0.79959400  | 0.11102000  |
| H | -5.32422300 | 1.97045100  | 0.13490100  |
| H | -4.31860900 | 2.03503400  | -1.31691400 |
| H | -5.38367600 | -0.68631500 | -1.21141900 |
| H | -5.99318900 | -0.04019200 | 0.31413800  |
| H | -1.14273800 | 2.85846000  | 0.56324000  |
| H | -1.79329900 | 2.75510900  | -1.05798100 |
| H | -3.36051400 | 2.47871900  | 1.55451400  |
| H | -3.55096700 | 3.71952000  | 0.31359200  |
| H | -5.68209300 | -2.52095400 | 0.38440900  |
| H | -4.68653600 | -1.70140800 | 1.59015500  |
| H | -3.77737800 | -2.73047300 | -1.14382600 |
| H | -3.27148200 | -3.36445000 | 0.41423600  |
| H | -0.91850600 | -2.94456900 | -0.05024900 |
| H | 1.59834900  | -2.40749800 | -0.02498800 |
| H | 6.15432000  | -1.03474200 | 0.96528800  |
| H | 6.20600700  | -1.02822100 | -0.80088200 |
| H | 7.96813800  | 0.47243700  | 0.14140700  |
| H | 6.78686200  | 1.41828000  | -0.77909700 |
| H | 6.73347000  | 1.41249100  | 0.99524800  |

**S3-F22. The coordinates of the optimized structures for the GS and ES of F22 compound**

**\* GS of F22 at PBE0/6-311++G(d,p)**

|   |             |             |             |
|---|-------------|-------------|-------------|
| O | 1.33444700  | 1.36272400  | -0.04363400 |
| O | 3.43475000  | 2.00548600  | -0.01431500 |
| O | 5.34171900  | 0.26106900  | 0.03395300  |
| O | 4.80885400  | -1.88731500 | 0.05286300  |
| N | -3.29283500 | 0.32786500  | -0.08432700 |
| C | -1.99994700 | -0.07821100 | -0.07654400 |
| C | -3.63639600 | 1.73275700  | -0.25438200 |
| C | -0.95238200 | 0.88321900  | -0.06210100 |
| C | -4.40030400 | -0.61485200 | -0.17164200 |

|   |             |             |             |
|---|-------------|-------------|-------------|
| C | -1.68546500 | -1.48064000 | -0.07611400 |
| C | -1.24282700 | 2.35836200  | -0.06196700 |
| C | -2.64457400 | 2.62981300  | 0.45534800  |
| C | -4.06392900 | -1.93636800 | 0.48530800  |
| C | -2.79510400 | -2.49394500 | -0.13415900 |
| C | 0.34603100  | 0.42049100  | -0.04500900 |
| C | -0.37679600 | -1.87585000 | -0.03967700 |
| C | 0.68547800  | -0.94735500 | -0.02806700 |
| C | 2.04113800  | -1.29147600 | -0.00178900 |
| C | 3.02647200  | -0.33018000 | 0.00463900  |
| C | 2.65610100  | 1.05657100  | -0.01664700 |
| C | 4.45012400  | -0.72790900 | 0.03253500  |
| H | -4.64173300 | 1.87470200  | 0.14837900  |
| H | -3.67667700 | 1.97805300  | -1.32566600 |
| H | -4.67195700 | -0.77169800 | -1.22578900 |
| H | -5.26059900 | -0.15070200 | 0.31744600  |
| H | -0.49783500 | 2.88045800  | 0.54291600  |
| H | -1.14055300 | 2.75194600  | -1.08149700 |
| H | -2.69337200 | 2.43898100  | 1.53273800  |
| H | -2.91949700 | 3.67490000  | 0.29393400  |
| H | -4.90067000 | -2.62653600 | 0.35312600  |
| H | -3.92611200 | -1.78587500 | 1.56161100  |
| H | -2.99232700 | -2.75605100 | -1.18190800 |
| H | -2.47928500 | -3.41367700 | 0.36496300  |
| H | -0.13933400 | -2.93580300 | -0.03002800 |
| H | 2.33739000  | -2.33634800 | 0.01447600  |
| H | 4.84851800  | 1.12031700  | 0.01625300  |

**\* ES of F22 at PBE0/6-311++G(d,p)**

|   |             |             |             |
|---|-------------|-------------|-------------|
| O | 1.33446500  | 1.35735000  | -0.04033800 |
| O | 3.43823900  | 1.99828100  | -0.00830600 |
| O | 5.34797100  | 0.28828800  | 0.03024100  |
| O | 4.83546300  | -1.87027000 | 0.03959700  |
| N | -3.30428600 | 0.34745800  | -0.09809200 |
| C | -2.00871600 | -0.08823800 | -0.07174100 |
| C | -3.61688500 | 1.75142100  | -0.28418400 |
| C | -0.94708700 | 0.86959600  | -0.04573600 |
| C | -4.41122200 | -0.58601000 | -0.18698900 |
| C | -1.71384900 | -1.48330500 | -0.06759600 |
| C | -1.22334800 | 2.34149300  | -0.03049300 |

|   |             |             |             |
|---|-------------|-------------|-------------|
| C | -2.63198800 | 2.63417200  | 0.45332200  |
| C | -4.09718100 | -1.90422000 | 0.48919000  |
| C | -2.82815000 | -2.48778900 | -0.10652200 |
| C | 0.35634600  | 0.39659500  | -0.04117600 |
| C | -0.39589200 | -1.88582300 | -0.03970000 |
| C | 0.67986600  | -0.97064600 | -0.03029200 |
| C | 2.05793700  | -1.34765400 | -0.00663200 |
| C | 3.03346900  | -0.34491900 | 0.00245900  |
| C | 2.66337600  | 1.03581100  | -0.01327700 |
| C | 4.45930800  | -0.70966200 | 0.02556500  |
| H | -4.63852800 | 1.91138000  | 0.06505500  |
| H | -3.59966100 | 1.98290800  | -1.36274400 |
| H | -4.64906600 | -0.75347800 | -1.25129300 |
| H | -5.28291500 | -0.10416800 | 0.26242500  |
| H | -0.47822100 | 2.84846200  | 0.58610600  |
| H | -1.09167800 | 2.73416800  | -1.04879600 |
| H | -2.71353700 | 2.44657100  | 1.52903400  |
| H | -2.88910900 | 3.68140900  | 0.27993400  |
| H | -4.94348000 | -2.58114900 | 0.35272200  |
| H | -3.97359100 | -1.74166500 | 1.56529700  |
| H | -3.01549100 | -2.78081600 | -1.14858500 |
| H | -2.52342600 | -3.39479200 | 0.42193000  |
| H | -0.16906300 | -2.94758600 | -0.02869800 |
| H | 2.35222400  | -2.38870300 | 0.00073300  |
| H | 4.84053100  | 1.14113600  | 0.01678900  |

**S3-F23. The coordinates of the optimized structures for the GS and ES of F23 compound**

**\* GS of F23 at PBE0/6-311++G(d,p)**

|   |             |             |             |
|---|-------------|-------------|-------------|
| O | 0.27406900  | 1.82610100  | 0.00000200  |
| O | 4.60899800  | -0.06851000 | -0.00001100 |
| O | -1.65867100 | 2.86561200  | -0.00006200 |
| C | -0.97164800 | -0.69376800 | 0.00001400  |
| C | 0.47733500  | -0.58161100 | 0.00001100  |
| C | -1.73423300 | 0.48860200  | 0.00000300  |
| C | 1.04235200  | 0.69535400  | 0.00000200  |
| C | 1.36766500  | -1.66681100 | 0.00000900  |
| C | -1.65517600 | -1.91831900 | 0.00002700  |
| C | -1.08766700 | 1.80146700  | 0.00000000  |

|   |             |             |             |
|---|-------------|-------------|-------------|
| C | 2.41427500  | 0.90817600  | -0.00000500 |
| C | -3.13275700 | 0.44294100  | -0.00000300 |
| C | 2.73422800  | -1.48537100 | 0.00000200  |
| C | 3.26353600  | -0.18937200 | -0.00000500 |
| C | -3.03789200 | -1.95422300 | 0.00002300  |
| C | -3.78645600 | -0.77334800 | 0.00000800  |
| H | 0.97981200  | -2.67867900 | 0.00001300  |
| H | -1.10354000 | -2.85082200 | 0.00003800  |
| H | 2.79491800  | 1.92389800  | -0.00001200 |
| H | -3.68316300 | 1.37674300  | -0.00001300 |
| H | 3.40978200  | -2.33287900 | 0.00000100  |
| H | -3.54494100 | -2.91356600 | 0.00003200  |
| H | -4.86990400 | -0.81308400 | 0.00000500  |
| H | 4.86049100  | 0.86045800  | -0.00001500 |

**\* ES of F23 at PBE0/6-311++G(d,p)**

|   |             |             |             |
|---|-------------|-------------|-------------|
| O | 0.30810200  | 1.86050400  | 0.00022900  |
| O | 4.57545500  | -0.09501900 | -0.00024700 |
| O | -1.65390900 | 2.91367600  | -0.00064100 |
| C | -0.96412900 | -0.69873000 | 0.00022700  |
| C | 0.46397000  | -0.57319300 | 0.00019600  |
| C | -1.72798100 | 0.53203500  | 0.00024300  |
| C | 1.04428300  | 0.74003000  | 0.00011900  |
| C | 1.36138100  | -1.67596500 | 0.00006000  |
| C | -1.62867600 | -1.92574900 | 0.00012400  |
| C | -1.12082400 | 1.80935000  | 0.00050500  |
| C | 2.41142900  | 0.91710600  | -0.00001600 |
| C | -3.13807600 | 0.42887500  | -0.00004200 |
| C | 2.71672300  | -1.51002900 | -0.00005500 |
| C | 3.25413100  | -0.19803700 | -0.00009000 |
| C | -3.02606900 | -2.00538200 | -0.00006500 |
| C | -3.76425800 | -0.81114300 | -0.00017900 |
| H | 0.95939300  | -2.68076300 | 0.00004400  |
| H | -1.05667800 | -2.84680700 | 0.00016600  |
| H | 2.81579500  | 1.92311500  | -0.00006300 |
| H | -3.72635800 | 1.33936800  | -0.00010000 |
| H | 3.39550400  | -2.35413600 | -0.00014800 |
| H | -3.52234000 | -2.96744800 | -0.00014800 |
| H | -4.84944700 | -0.85083700 | -0.00035700 |
| H | 4.85552400  | 0.82921600  | -0.00028500 |

**S3-F24. The coordinates of the optimized structures for the GS and ES of F24 compound**

**\* GS of F24 at PBE0/6-311++G(d,p)**

|   |             |             |             |
|---|-------------|-------------|-------------|
| O | -0.86408500 | -1.43943400 | -0.00008000 |
| O | -3.06929600 | -1.37066800 | 0.00017600  |
| C | 0.48067900  | 0.55791500  | 0.00001200  |
| C | 0.35113600  | -0.83418400 | -0.00010600 |
| C | 1.76241100  | 1.12368600  | -0.00003600 |
| C | -0.73718500 | 1.33113100  | 0.00018800  |
| C | 1.47227200  | -1.65729500 | -0.00026800 |
| C | 2.73074700  | -1.07958900 | -0.00031300 |
| C | 2.87992500  | 0.31067100  | -0.00019700 |
| C | -1.94351000 | 0.70423400  | 0.00019300  |
| C | -2.04302400 | -0.72568300 | 0.00001400  |
| H | 1.85915600  | 2.20300800  | 0.00005800  |
| H | 1.33915800  | -2.73294000 | -0.00036000 |
| H | 3.87080800  | 0.75026200  | -0.00023200 |
| H | -2.87702600 | 1.25424100  | 0.00032600  |
| H | 3.60807500  | -1.71736400 | -0.00044100 |
| O | -0.57777700 | 2.65451700  | 0.00031800  |
| H | -1.43161900 | 3.10215100  | 0.00041300  |

**\* ES of F24 at PBE0/6-311++G(d,p)**

|   |             |             |             |
|---|-------------|-------------|-------------|
| O | -0.84024300 | -1.45879400 | 0.00046700  |
| O | -3.05038600 | -1.42025000 | -0.00036800 |
| C | 0.46447400  | 0.60132100  | 0.00018700  |
| C | 0.34970900  | -0.85018500 | 0.00001900  |
| C | 1.77180500  | 1.14834600  | 0.00005400  |
| C | -0.71135100 | 1.34841400  | 0.00028100  |
| C | 1.47747300  | -1.66705200 | -0.00043000 |
| C | 2.74389500  | -1.09438100 | -0.00056500 |
| C | 2.87642700  | 0.31575100  | -0.00030000 |
| C | -1.96986800 | 0.68678800  | 0.00012400  |
| C | -2.05684600 | -0.71075600 | 0.00045000  |
| H | 1.88733000  | 2.22464800  | 0.00019800  |
| H | 1.33562000  | -2.74153900 | -0.00056100 |
| H | 3.86995000  | 0.75151100  | -0.00040400 |
| H | -2.90292100 | 1.23744800  | -0.00021900 |
| H | 3.62660300  | -1.72265300 | -0.00085900 |



|   |             |            |            |
|---|-------------|------------|------------|
| O | -0.61022700 | 2.68998700 | 0.00025900 |
| H | -1.48403200 | 3.09355500 | 0.00007000 |

**S3-F25. The coordinates of the optimized structures for the GS and ES of F25 compound**

**\* GS of F25 at PBE0/6-311++G(d,p)**

|   |             |             |             |
|---|-------------|-------------|-------------|
| O | -1.19965400 | -1.11187600 | -0.00003100 |
| O | -3.40082400 | -1.25866200 | 0.00001000  |
| C | -0.06004400 | 1.00202100  | 0.00005300  |
| C | -0.04201600 | -0.40030400 | 0.00004100  |
| C | 1.17021300  | 1.67528400  | 0.00004700  |
| C | -1.33429900 | 1.64811500  | 0.00003200  |
| C | 1.14097300  | -1.12009100 | 0.00003800  |
| C | 2.34390100  | -0.42337900 | 0.00006800  |
| C | 2.36044700  | 0.98007600  | -0.00006000 |
| C | -2.47573400 | 0.92431300  | -0.00003300 |
| C | -2.44300000 | -0.51904000 | -0.00004800 |
| H | 1.17636200  | 2.76039100  | -0.00010300 |
| H | 1.12805800  | -2.20324300 | -0.00003600 |
| H | 3.30720100  | 1.51057800  | -0.00031300 |
| H | -3.45620900 | 1.38248900  | -0.00007700 |
| H | -1.37207300 | 2.73347600  | 0.00005700  |
| O | 3.47642200  | -1.15542900 | -0.00003400 |
| H | 4.24646900  | -0.57792600 | 0.00007700  |

**\* ES of F25 at PBE0/6-311++G(d,p)**

|   |             |             |             |
|---|-------------|-------------|-------------|
| O | -1.20002300 | -1.13360700 | 0.00042000  |
| O | -3.41360000 | -1.26381600 | -0.00048200 |
| C | -0.06296600 | 1.02828600  | 0.00010300  |
| C | -0.05257200 | -0.41720700 | 0.00016300  |
| C | 1.20349800  | 1.68562200  | -0.00031000 |
| C | -1.29990100 | 1.69717500  | 0.00050500  |
| C | 1.12208700  | -1.12760000 | 0.00013900  |
| C | 2.34478900  | -0.43993200 | -0.00004400 |
| C | 2.37770800  | 0.97841500  | -0.00024200 |
| C | -2.47804100 | 0.92073000  | -0.00002800 |
| C | -2.46172900 | -0.49039400 | -0.00010300 |
| H | 1.22082700  | 2.76965300  | -0.00048800 |
| H | 1.10779600  | -2.21083900 | 0.00024900  |

|   |             |             |             |
|---|-------------|-------------|-------------|
| H | 3.33340800  | 1.49299900  | -0.00034400 |
| H | -3.45741300 | 1.38411800  | -0.00045400 |
| H | -1.34105000 | 2.77856800  | 0.00063800  |
| O | 3.45565800  | -1.17821700 | 0.00001300  |
| H | 4.24291400  | -0.61994300 | -0.00029900 |

**S3-F26. The coordinates of the optimized structures for the GS and ES of F26 compound**

**\* GS of F26 at PBE0/6-311++G(d,p)**

|   |             |             |             |
|---|-------------|-------------|-------------|
| O | 0.58777600  | -1.73893100 | -0.11641000 |
| O | 5.03023800  | -0.28296000 | 0.45688800  |
| O | -1.42641000 | -2.57980100 | -0.34575900 |
| C | 1.01799200  | 0.61809600  | -0.19717200 |
| C | -1.24832100 | -0.21507200 | -0.49828400 |
| C | 1.47700800  | -0.70382600 | -0.04895200 |
| C | -0.37518500 | 0.84543300  | -0.42025200 |
| C | 2.00474300  | 1.62800500  | -0.10871400 |
| C | -0.75600700 | -1.55740700 | -0.32375700 |
| C | 2.79917600  | -1.02965800 | 0.16685600  |
| C | 3.80475700  | -0.01850300 | 0.25731500  |
| C | 3.32732100  | 1.33522300  | 0.10558500  |
| H | 1.70544800  | 2.66625700  | -0.21506900 |
| H | 3.08142800  | -2.07270400 | 0.27238500  |
| H | 4.06050100  | 2.13485000  | 0.16800800  |
| C | -0.85278600 | 2.25958100  | -0.55709000 |
| H | -1.93195400 | 2.32190600  | -0.68073800 |
| H | -0.58181400 | 2.84118200  | 0.32954300  |
| H | -0.37966600 | 2.74836300  | -1.41516200 |
| C | -2.72205800 | -0.07430700 | -0.72450000 |
| H | -2.93706500 | 0.66847400  | -1.49767100 |
| H | -3.11109100 | -1.02328600 | -1.10488600 |
| C | -3.58941000 | 0.27584400  | 0.51222100  |
| O | -3.06152400 | 0.22361600  | 1.64541400  |
| O | -4.78372500 | 0.56988900  | 0.25537600  |

**\* ES of F26 at PBE0/6-311++G(d,p)**

|   |             |            |             |
|---|-------------|------------|-------------|
| O | 0.60860600  | 1.76839300 | -0.07224300 |
| O | 5.02223200  | 0.27503000 | 0.43206700  |
| O | -1.40751300 | 2.63684800 | -0.37215400 |

|   |             |             |             |
|---|-------------|-------------|-------------|
| C | 1.01190900  | -0.62138900 | -0.18209400 |
| C | -1.24260200 | 0.25301500  | -0.48192800 |
| C | 1.47024500  | 0.71173400  | -0.03265900 |
| C | -0.38891600 | -0.87023600 | -0.37293400 |
| C | 2.00750500  | -1.64140700 | -0.12549400 |
| C | -0.75979300 | 1.57978400  | -0.32311600 |
| C | 2.79563100  | 1.01273200  | 0.16787200  |
| C | 3.80676800  | -0.01732400 | 0.24034100  |
| C | 3.34140600  | -1.36679100 | 0.08022800  |
| H | 1.69216300  | -2.67267900 | -0.24544200 |
| H | 3.10102100  | 2.04788700  | 0.28129300  |
| H | 4.07371800  | -2.16728400 | 0.12423200  |
| C | -0.86729300 | -2.27636000 | -0.47631100 |
| H | -0.55270200 | -2.87435600 | 0.39253300  |
| H | -1.95413200 | -2.33726900 | -0.53647900 |
| H | -0.45775400 | -2.79348800 | -1.35947800 |
| C | -2.69814000 | 0.10325100  | -0.73704900 |
| H | -3.10150800 | 1.05294700  | -1.10063400 |
| H | -2.89097700 | -0.64618200 | -1.51114400 |
| C | -3.59566300 | -0.28275100 | 0.48845500  |
| O | -3.14547900 | -0.09048900 | 1.63720900  |
| O | -4.72736700 | -0.72917300 | 0.18552700  |

**S3-F27. The coordinates of the optimized structures for the GS and ES of F27 compound**

**\* GS of F27 at PBE0/6-311++G(d,p)**

|   |             |             |             |
|---|-------------|-------------|-------------|
| O | -5.12849700 | 0.30720300  | 1.04705300  |
| O | -1.22752300 | 1.40576600  | -0.27410600 |
| O | -4.97218600 | -1.49574100 | -0.27954500 |
| O | -3.27033600 | 2.20777600  | -0.31330100 |
| C | -0.74663700 | -0.92996200 | -0.13751600 |
| C | -3.05345400 | -0.15378500 | 0.00921400  |
| C | -0.31603600 | 0.39901300  | -0.24152500 |
| C | -2.14132100 | -1.16453600 | -0.01842400 |
| C | -4.52221700 | -0.46289800 | 0.27020400  |
| C | 0.25082000  | -1.92017400 | -0.12405500 |
| C | -2.59771400 | 1.20882400  | -0.18306300 |
| C | 1.01765500  | 0.75187500  | -0.31929300 |
| C | 2.01360600  | -0.24662800 | -0.31386400 |

|   |             |             |             |
|---|-------------|-------------|-------------|
| C | 1.58432200  | -1.60088200 | -0.20532900 |
| H | -2.49970400 | -2.18654000 | 0.07117900  |
| H | -0.04468000 | -2.96149500 | -0.03731100 |
| H | 1.25881900  | 1.80379400  | -0.38577900 |
| H | 2.30994900  | -2.40207100 | -0.17582200 |
| N | 3.33594700  | 0.07056800  | -0.42477200 |
| C | 3.77033400  | 1.45992800  | -0.45851000 |
| H | 4.76948700  | 1.47135300  | -0.89965600 |
| H | 3.13104600  | 2.01824900  | -1.15052300 |
| C | 4.36423400  | -0.96083000 | -0.41761300 |
| H | 5.23693000  | -0.54325700 | -0.92544600 |
| H | 4.03257600  | -1.79976200 | -1.03668300 |
| C | 3.80455100  | 2.14895600  | 0.90146600  |
| H | 2.82378300  | 2.13610700  | 1.38382700  |
| H | 4.51850100  | 1.66313600  | 1.57085900  |
| H | 4.10823900  | 3.19290200  | 0.78101100  |
| C | 4.76644200  | -1.45241100 | 0.96834300  |
| H | 3.91016900  | -1.85729400 | 1.51413600  |
| H | 5.51637300  | -2.24380200 | 0.87850500  |
| H | 5.19771600  | -0.64426600 | 1.56409400  |

**\* ES of F27 at PBE0/6-311++G(d,p)**

|   |             |             |             |
|---|-------------|-------------|-------------|
| O | -5.36977400 | 0.45637500  | 0.19404200  |
| O | -1.22797900 | 1.38689600  | -0.15550800 |
| O | -4.95780100 | -1.56752200 | 0.23828000  |
| O | -3.27346300 | 2.20295200  | -0.03883900 |
| C | -0.74685700 | -0.98994500 | -0.10209000 |
| C | -3.04121800 | -0.16416100 | 0.03613300  |
| C | -0.31768100 | 0.35313100  | -0.18210600 |
| C | -2.12561800 | -1.25520900 | 0.00911600  |
| C | -4.43974100 | -0.41055100 | 0.15383800  |
| C | 0.28557900  | -1.95192700 | -0.13139300 |
| C | -2.59878300 | 1.17823800  | -0.04801600 |
| C | 1.00854600  | 0.71786600  | -0.28384400 |
| C | 2.02950800  | -0.25796800 | -0.32520200 |
| C | 1.62085400  | -1.60777500 | -0.23338600 |
| H | -2.48708600 | -2.27375700 | 0.07744800  |
| H | 0.01629700  | -3.00220300 | -0.06404400 |
| H | 1.23071700  | 1.77615700  | -0.32879300 |
| H | 2.35466900  | -2.40352500 | -0.23865500 |

|   |            |             |             |
|---|------------|-------------|-------------|
| N | 3.35576300 | 0.09594400  | -0.47487400 |
| C | 3.75561300 | 1.49053400  | -0.49091200 |
| H | 4.74003500 | 1.53740400  | -0.96449600 |
| H | 3.08154400 | 2.04929500  | -1.15003400 |
| C | 4.39900700 | -0.91233000 | -0.45212600 |
| H | 5.27533400 | -0.47925700 | -0.94227300 |
| H | 4.09382600 | -1.75705700 | -1.07965200 |
| C | 3.81934800 | 2.16530400  | 0.87710500  |
| H | 2.85652600 | 2.11508000  | 1.39251900  |
| H | 4.57045600 | 1.69286900  | 1.51512400  |
| H | 4.08714000 | 3.22024700  | 0.76273300  |
| C | 4.79081100 | -1.41271400 | 0.93589300  |
| H | 3.93049500 | -1.82832800 | 1.46722300  |
| H | 5.54857300 | -2.19785700 | 0.85164200  |
| H | 5.20706000 | -0.60524400 | 1.54353700  |

**S3-F28. The coordinates of the optimized structures for the GS and ES of F28 compound**

**\* GS of F28 at PBE0/6-311++G(d,p)**

|   |             |             |             |
|---|-------------|-------------|-------------|
| O | 3.26168800  | 0.59442900  | 0.02427900  |
| O | -0.84115500 | 1.42768800  | 0.23230100  |
| O | 4.72569000  | 0.30665600  | -2.33364300 |
| O | 4.87163300  | -0.03784900 | 2.21234000  |
| O | 2.81969200  | -1.61694000 | -0.11462200 |
| O | 1.18211100  | 2.27497100  | 0.18756600  |
| N | 4.56641100  | 0.22698900  | -0.04606600 |
| C | 6.65946900  | -0.22678500 | -0.91603900 |
| C | 6.70805600  | -0.34463400 | 0.61004900  |
| C | 5.23674600  | 0.12945800  | -1.25794700 |
| C | 5.31223600  | -0.04924000 | 1.09186200  |
| C | -1.29578900 | -0.92012700 | 0.11590400  |
| C | 0.99415400  | -0.11118300 | 0.06078100  |
| C | -1.74104900 | 0.41347300  | 0.21631500  |
| C | 0.07997600  | -1.14499700 | 0.03861100  |
| C | 2.39996200  | -0.49444000 | -0.02058600 |
| C | -2.28469900 | -1.92955800 | 0.09610900  |
| C | 0.53098300  | 1.26022400  | 0.16039000  |
| C | -3.07130700 | 0.74849300  | 0.29596200  |
| C | -4.05654000 | -0.26819100 | 0.29059300  |

|   |             |             |             |
|---|-------------|-------------|-------------|
| C | -3.61314000 | -1.62487700 | 0.17435800  |
| H | 6.91535000  | -1.15746200 | -1.42630300 |
| H | 7.31581700  | 0.55372900  | -1.30637000 |
| H | 7.39334700  | 0.36808900  | 1.07337100  |
| H | 6.98877000  | -1.34209800 | 0.95408800  |
| H | 0.45514400  | -2.16098200 | -0.03922800 |
| H | -1.97308000 | -2.96579800 | 0.01301400  |
| H | -3.32780500 | 1.79647500  | 0.35736200  |
| H | -4.33261000 | -2.43078600 | 0.14480200  |
| N | -5.37046900 | 0.02793200  | 0.40376000  |
| C | -5.82499600 | 1.41212200  | 0.50356400  |
| H | -6.80452800 | 1.39057800  | 0.98489900  |
| H | -5.16499100 | 1.95203700  | 1.18841300  |
| C | -6.39350200 | -1.01476000 | 0.36439700  |
| H | -7.27792500 | -0.60573300 | 0.85619800  |
| H | -6.06893400 | -1.85637700 | 0.98220300  |
| C | -5.92201100 | 2.13909700  | -0.83196000 |
| H | -4.96150100 | 2.15531900  | -1.35318300 |
| H | -6.65704000 | 1.66555500  | -1.48671200 |
| H | -6.23419100 | 3.17356100  | -0.66436400 |
| C | -6.75642200 | -1.48676300 | -1.03778700 |
| H | -5.88726600 | -1.88684100 | -1.56604300 |
| H | -7.50867300 | -2.27792600 | -0.97486200 |
| H | -7.17153300 | -0.67130500 | -1.63434900 |

**\* ES of F28 at PBE0/6-311++G(d,p)**

|   |             |             |             |
|---|-------------|-------------|-------------|
| O | -3.26769500 | 0.62193000  | -0.01116100 |
| O | 0.84667900  | 1.40933900  | -0.18566300 |
| O | -4.70202400 | 0.23448200  | 2.35034600  |
| O | -4.90729200 | 0.07917600  | -2.20392400 |
| O | -2.84701000 | -1.60956200 | 0.03697400  |
| O | -1.17600100 | 2.24998400  | -0.10645900 |
| N | -4.56956900 | 0.25394400  | 0.05932200  |
| C | -6.65012100 | -0.24975500 | 0.93694300  |
| C | -6.71901500 | -0.30216700 | -0.59151100 |
| C | -5.22441700 | 0.10036900  | 1.27314900  |
| C | -5.33019200 | 0.01957000  | -1.07751100 |
| C | 1.30227900  | -0.96048100 | -0.17001300 |
| C | -0.99938100 | -0.13965900 | -0.08242500 |
| C | 1.73924600  | 0.37941000  | -0.21304900 |

|   |             |             |             |
|---|-------------|-------------|-------------|
| C | -0.09406300 | -1.21593000 | -0.10534700 |
| C | -2.40531600 | -0.48284600 | -0.01287300 |
| C | 2.30636700  | -1.95749800 | -0.19246600 |
| C | -0.52779300 | 1.22767500  | -0.12244000 |
| C | 3.07073800  | 0.72469600  | -0.28223000 |
| C | 4.06722700  | -0.28396200 | -0.31330200 |
| C | 3.64270200  | -1.64036400 | -0.26101500 |
| H | -6.89272800 | -1.20351000 | 1.40973200  |
| H | -7.30591000 | 0.50829200  | 1.37009900  |
| H | -7.41304700 | 0.42692100  | -1.01481700 |
| H | -7.00071200 | -1.28509900 | -0.97438300 |
| H | -0.46988300 | -2.22958200 | -0.06998600 |
| H | 2.00643000  | -2.99927000 | -0.15879800 |
| H | 3.31775200  | 1.77714500  | -0.29956300 |
| H | 4.36531000  | -2.44412600 | -0.28572200 |
| N | 5.39242600  | 0.04410000  | -0.39826000 |
| C | 5.82434600  | 1.42552900  | -0.53839600 |
| H | 6.78189300  | 1.40789800  | -1.06293400 |
| H | 5.12097800  | 1.95107400  | -1.18816500 |
| C | 6.42592600  | -0.97380000 | -0.28407700 |
| H | 7.34525700  | -0.53689000 | -0.67529000 |
| H | 6.17304500  | -1.81294600 | -0.94026900 |
| C | 5.98101500  | 2.16585800  | 0.79027000  |
| H | 5.04540500  | 2.17598600  | 1.35407700  |
| H | 6.75507100  | 1.70807800  | 1.40911700  |
| H | 6.27361800  | 3.19925300  | 0.58654200  |
| C | 6.65606000  | -1.47081700 | 1.14332700  |
| H | 5.74733500  | -1.89992600 | 1.57084200  |
| H | 7.42692600  | -2.24561800 | 1.12678100  |
| H | 6.99636600  | -0.66176100 | 1.79218600  |

**S3-F29. The coordinates of the optimized structures for the GS and ES of F29 compound**

**\* GS of F29 at PBE0/6-311++G(d,p)**

|   |             |             |             |
|---|-------------|-------------|-------------|
| O | 4.43729300  | -0.54821700 | -0.00439800 |
| O | 0.22091000  | -1.42542700 | 0.00101500  |
| O | 3.90057600  | 1.62462900  | 0.00044000  |
| O | -4.24623800 | 0.20429200  | -0.00031600 |
| O | 2.21211200  | -2.33552400 | 0.00181500  |

|   |             |             |             |
|---|-------------|-------------|-------------|
| C | -0.16956200 | 0.92379700  | 0.00055700  |
| C | 2.12710200  | 0.07337300  | 0.00023000  |
| C | -0.64542500 | -0.38946700 | 0.00062200  |
| C | 1.24054300  | 1.10548500  | 0.00030500  |
| C | 3.62702000  | 0.40029100  | -0.00125000 |
| C | -1.11350700 | 1.96790900  | 0.00036400  |
| C | 1.61155600  | -1.28890500 | 0.00130600  |
| C | -2.00362900 | -0.69028400 | 0.00034000  |
| C | -2.91143400 | 0.36398000  | 0.00007300  |
| C | -2.46015700 | 1.69901500  | 0.00015800  |
| H | 1.65245200  | 2.11030600  | -0.00010500 |
| H | -0.76211800 | 2.99470100  | 0.00031800  |
| H | -2.31286700 | -1.72707600 | 0.00032600  |
| H | -3.19575500 | 2.49502900  | -0.00002300 |
| C | -4.77042600 | -1.11540600 | -0.00055400 |
| H | -4.45888300 | -1.66195700 | -0.89580900 |
| H | -4.45930800 | -1.66212900 | 0.89474100  |
| H | -5.85322900 | -1.00564100 | -0.00080300 |

**\* ES of F29 at PBE0/6-311++G(d,p)**

|   |             |             |             |
|---|-------------|-------------|-------------|
| O | -4.41980700 | -0.56328000 | -0.00013700 |
| O | -0.24226100 | -1.39724500 | -0.00011600 |
| O | -4.05935100 | 1.47117100  | -0.00008600 |
| O | 4.28074000  | 0.13826700  | 0.00019400  |
| O | -2.27208000 | -2.26100900 | 0.00019200  |
| C | 0.17552200  | 0.99177400  | -0.00005500 |
| C | -2.10109500 | 0.11097100  | -0.00017500 |
| C | 0.63833500  | -0.34113400 | -0.00001500 |
| C | -1.21452000 | 1.22207300  | -0.00016000 |
| C | -3.51270800 | 0.32606200  | -0.00014700 |
| C | 1.17306200  | 1.99555000  | 0.00006500  |
| C | -1.62253400 | -1.22239300 | -0.00020400 |
| C | 1.98415100  | -0.67061000 | 0.00007900  |
| C | 2.93660300  | 0.35047700  | 0.00015000  |
| C | 2.51813400  | 1.68644500  | 0.00016600  |
| H | -1.60336600 | 2.23250200  | -0.00016700 |
| H | 0.86194800  | 3.03571300  | 0.00007300  |
| H | 2.25878100  | -1.71791900 | 0.00007200  |
| H | 3.26847300  | 2.46985400  | 0.00024600  |
| C | 4.73885200  | -1.19956700 | 0.00013700  |



|   |            |             |             |
|---|------------|-------------|-------------|
| H | 4.40324200 | -1.73696700 | 0.89391700  |
| H | 4.40335700 | -1.73684500 | -0.89375900 |
| H | 5.82682800 | -1.14745100 | 0.00020900  |

**S3-F30. The coordinates of the optimized structures for the GS and ES of F30 compound**

**\* GS of F30 at PBE0/6-311++G(d,p)**

|   |             |             |             |
|---|-------------|-------------|-------------|
| O | -2.30463300 | -0.60294600 | 0.03888400  |
| O | 1.81165200  | -1.39322400 | 0.04792700  |
| O | -3.86620600 | -0.33312200 | -2.25762900 |
| O | -3.83714800 | -0.00772300 | 2.29270400  |
| O | -1.89610800 | 1.61296700  | -0.10665700 |
| O | 6.28663000  | 0.17388400  | 0.00424100  |
| O | -0.20419900 | -2.26306600 | 0.07013900  |
| N | -3.61841900 | -0.25809600 | 0.02244100  |
| C | -5.75210600 | 0.15750100  | -0.76158600 |
| C | -5.74201300 | 0.26922800  | 0.76585700  |
| C | -4.33790200 | -0.16996100 | -1.16259000 |
| C | -4.32289800 | -0.00088800 | 1.19165600  |
| C | 2.23761300  | 0.95799000  | -0.04320100 |
| C | -0.04593400 | 0.12740700  | -0.01820500 |
| C | 2.69130800  | -0.36835100 | 0.01152400  |
| C | 0.84553100  | 1.16724800  | -0.05725700 |
| C | -1.46723500 | 0.49491200  | -0.03722900 |
| C | 3.19936800  | 1.99099300  | -0.07965300 |
| C | 0.43576200  | -1.24505600 | 0.03628600  |
| C | 4.03939500  | -0.68953100 | 0.03000400  |
| C | 4.96389300  | 0.35264300  | -0.00760200 |
| C | 4.53580400  | 1.69848900  | -0.06230000 |
| H | -6.04600400 | 1.08474600  | -1.25738100 |
| H | -6.40837700 | -0.63420200 | -1.12885800 |
| H | -6.39464600 | -0.45803800 | 1.25310500  |
| H | -6.02770800 | 1.25994300  | 1.12493300  |
| H | 0.45648800  | 2.18007000  | -0.09915800 |
| H | 2.86306100  | 3.02143900  | -0.12174600 |
| H | 4.33293700  | -1.72963600 | 0.07220600  |
| H | 5.28752000  | 2.47825700  | -0.08989100 |
| C | 6.80142700  | -1.15218100 | 0.05563400  |
| H | 6.48214100  | -1.65878800 | 0.97056200  |

|   |            |             |             |
|---|------------|-------------|-------------|
| H | 6.48726100 | -1.72590600 | -0.82065200 |
| H | 7.88428300 | -1.04803700 | 0.05489200  |

**\* ES of F30 at PBE0/6-311++G(d,p)**

|   |             |             |             |
|---|-------------|-------------|-------------|
| O | -2.31670300 | -0.63388900 | 0.03709100  |
| O | 1.81382600  | -1.39190200 | 0.05466500  |
| O | -3.85465100 | -0.31862700 | -2.26960500 |
| O | -3.86573100 | -0.05329700 | 2.28472300  |
| O | -1.91158200 | 1.60116200  | -0.06777600 |
| O | 6.29214100  | 0.15205300  | -0.01234300 |
| O | -0.20291100 | -2.23757900 | 0.08091800  |
| N | -3.62417500 | -0.27980700 | 0.01370300  |
| C | -5.74637100 | 0.17728900  | -0.78510000 |
| C | -5.74900000 | 0.27179400  | 0.74300300  |
| C | -4.33204900 | -0.16353200 | -1.17508700 |
| C | -4.33760200 | -0.02516900 | 1.17724400  |
| C | 2.23260900  | 0.99121800  | -0.02519300 |
| C | -0.05835000 | 0.14619900  | 0.00171600  |
| C | 2.69675000  | -0.36833000 | 0.01857400  |
| C | 0.84708100  | 1.23604600  | -0.03323800 |
| C | -1.46721800 | 0.47524600  | -0.01526500 |
| C | 3.21911900  | 2.00732000  | -0.05896900 |
| C | 0.43176900  | -1.21057400 | 0.04776400  |
| C | 4.03321800  | -0.69925500 | 0.02475500  |
| C | 4.97667100  | 0.33218900  | -0.01184800 |
| C | 4.55381400  | 1.69380100  | -0.05251200 |
| H | -6.02377900 | 1.11354600  | -1.27344800 |
| H | -6.40897300 | -0.60197300 | -1.16747100 |
| H | -6.41753800 | -0.45009800 | 1.21650500  |
| H | -6.02206800 | 1.26305300  | 1.11045400  |
| H | 0.46168000  | 2.24570300  | -0.06676800 |
| H | 2.90184100  | 3.04329300  | -0.09076400 |
| H | 4.31480600  | -1.74347900 | 0.05722000  |
| H | 5.31570800  | 2.46430800  | -0.07855900 |
| C | 6.81844800  | -1.17109800 | 0.01975000  |
| H | 6.50512100  | -1.68677700 | 0.93195800  |
| H | 6.49429600  | -1.73372800 | -0.86040200 |
| H | 7.89968200  | -1.05743000 | 0.01041700  |

#### S4. The specific data of the calculated emission energies of the studied compounds

Table S.1. The calculated emission energies of coumarin derivatives using 11 DFT functionals (eV)

| Compounds | PBE0 | PBE  | B3LYP | CAM-B3LYP | M06  | M06-2X | BP86 | LC- $\omega$ PBE | APFD | PW6B95D3 | $\omega$ B97XD |
|-----------|------|------|-------|-----------|------|--------|------|------------------|------|----------|----------------|
| F1        | 3.54 | 3.17 | 3.45  | 3.68      | 3.51 | 3.68   | 3.18 | 3.83             | 3.51 | 3.52     | 3.71           |
| F2        | 2.48 | 1.86 | 2.37  | 3.03      | 2.53 | 3.02   | 1.87 | 3.32             | 2.43 | 2.53     | 3.06           |
| F3        | 3.22 | 2.79 | 3.13  | 3.43      | 3.20 | 3.45   | 2.80 | 3.62             | 3.19 | 3.22     | 3.45           |
| F4        | 3.46 | 3.16 | 3.39  | 3.55      | 3.41 | 3.56   | 3.16 | 3.65             | 3.43 | 3.44     | 3.56           |
| F5        | 3.52 | 3.25 | 3.45  | 3.60      | 3.46 | 3.62   | 3.25 | 3.69             | 3.50 | 3.50     | 3.62           |
| F6        | 3.01 | 2.59 | 2.92  | 3.21      | 3.01 | 3.19   | 2.59 | 3.39             | 2.97 | 3.00     | 3.25           |
| F7        | 2.63 | 1.76 | 2.44  | 3.45      | 2.70 | 3.36   | 1.77 | 4.03             | 2.56 | 2.67     | 3.63           |
| F8        | 3.10 | 2.61 | 3.01  | 3.25      | 3.06 | 3.26   | 2.62 | 3.39             | 3.07 | 3.09     | 3.28           |
| F9        | 3.25 | 2.77 | 3.16  | 3.48      | 3.25 | 3.47   | 2.78 | 3.68             | 3.21 | 3.24     | 3.52           |
| F10       | 3.20 | 2.73 | 3.12  | 3.46      | 3.21 | 3.44   | 2.73 | 3.67             | 3.17 | 3.20     | 3.50           |
| F11       | 3.01 | 2.65 | 2.93  | 3.19      | 3.00 | 3.16   | 2.68 | 3.35             | 2.98 | 3.00     | 3.21           |
| F12       | 3.48 | 2.88 | 3.41  | 3.57      | 3.43 | 3.58   | 2.90 | 3.67             | 3.46 | 3.45     | 3.59           |
| F13       | 3.33 | 2.95 | 3.25  | 3.48      | 3.30 | 3.49   | 2.95 | 3.62             | 3.31 | 3.32     | 3.50           |
| F14       | 3.46 | 3.16 | 3.39  | 3.58      | 3.41 | 3.62   | 3.16 | 3.75             | 3.44 | 3.44     | 3.62           |
| F15       | 3.65 | 3.34 | 3.41  | 3.72      | 3.56 | 3.73   | 3.34 | 3.84             | 3.59 | 3.59     | 3.75           |
| F16       | 3.32 | 2.85 | 3.21  | 3.54      | 3.32 | 3.52   | 2.85 | 3.73             | 3.28 | 3.30     | 3.58           |
| F17       | 2.70 | 2.44 | 2.64  | 2.86      | 2.68 | 2.84   | 2.43 | 3.00             | 2.68 | 2.70     | 2.89           |
| F18       | 2.75 | 2.45 | 2.68  | 2.92      | 2.72 | 2.91   | 2.45 | 3.09             | 2.73 | 2.74     | 2.96           |
| F19       | 2.86 | 2.52 | 2.78  | 3.05      | 2.82 | 3.03   | 2.52 | 3.23             | 2.83 | 2.85     | 3.09           |
| F20       | 3.12 | 2.73 | 3.03  | 3.33      | 3.10 | 3.35   | 2.73 | 3.55             | 3.09 | 3.11     | 3.37           |
| F21       | 3.05 | 2.71 | 2.97  | 3.20      | 3.03 | 3.19   | 2.71 | 3.36             | 3.02 | 3.03     | 3.24           |
| F22       | 3.00 | 2.65 | 2.92  | 3.16      | 2.98 | 3.15   | 2.66 | 3.32             | 2.97 | 2.98     | 3.20           |
| F23       | 3.40 | 2.89 | 3.29  | 3.68      | 3.35 | 3.70   | 2.89 | 3.94             | 3.37 | 3.40     | 3.72           |
| F24       | 3.92 | 3.59 | 3.84  | 4.04      | 3.85 | 4.07   | 3.59 | 4.16             | 3.90 | 3.90     | 4.05           |
| F25       | 3.76 | 3.49 | 3.69  | 3.83      | 3.68 | 3.85   | 3.49 | 3.92             | 3.75 | 3.73     | 3.85           |
| F26       | 3.13 | 2.67 | 3.04  | 3.29      | 3.09 | 3.27   | 2.68 | 3.44             | 3.10 | 3.11     | 3.32           |
| F27       | 3.17 | 2.82 | 3.06  | 3.35      | 3.17 | 3.35   | 2.82 | 3.50             | 3.13 | 3.16     | 3.38           |
| F28       | 3.09 | 2.74 | 3.02  | 3.26      | 3.09 | 3.23   | 2.75 | 3.41             | 3.07 | 3.08     | 3.29           |
| F29       | 3.61 | 3.27 | 3.53  | 3.67      | 3.56 | 3.71   | 3.28 | 3.82             | 3.59 | 3.60     | 3.68           |
| F30       | 3.43 | 2.91 | 3.35  | 3.53      | 3.39 | 3.54   | 2.93 | 3.64             | 3.41 | 3.41     | 3.55           |

**Table S.2. The difference between the calculated emission energies and the experimental emission energies of coumarin derivatives using 11 DFT functionals (eV)**

| Compounds | PBE0        | PBE          | B3LYP       | CAM-B3LYP   | M06         | M06-2X      | BP86         | LC- $\omega$ PBE | APFD        | PW6B95D3    | $\omega$ B97XD |
|-----------|-------------|--------------|-------------|-------------|-------------|-------------|--------------|------------------|-------------|-------------|----------------|
| F1        | 0.66        | 0.29         | 0.57        | 0.80        | 0.63        | 0.80        | 0.30         | 0.94             | 0.63        | 0.64        | 0.83           |
| F2        | -0.16       | -0.79        | -0.28       | 0.38        | -0.12       | 0.37        | -0.78        | 0.67             | -0.22       | -0.12       | 0.41           |
| F3        | 0.23        | -0.20        | 0.14        | 0.45        | 0.21        | 0.47        | -0.19        | 0.63             | 0.20        | 0.23        | 0.47           |
| F4        | 0.45        | 0.15         | 0.37        | 0.54        | 0.39        | 0.55        | 0.15         | 0.63             | 0.42        | 0.43        | 0.55           |
| F5        | 0.77        | 0.49         | 0.70        | 0.85        | 0.71        | 0.86        | 0.49         | 0.93             | 0.75        | 0.75        | 0.86           |
| F6        | 0.42        | 0.00         | 0.32        | 0.62        | 0.42        | 0.59        | 0.00         | 0.79             | 0.38        | 0.40        | 0.66           |
| F7        | 0.02        | -0.85        | -0.17       | 0.84        | 0.09        | 0.75        | -0.85        | 1.42             | -0.05       | 0.06        | 1.02           |
| F8        | 0.33        | -0.16        | 0.24        | 0.48        | 0.29        | 0.49        | -0.15        | 0.62             | 0.30        | 0.32        | 0.51           |
| F9        | 0.54        | 0.07         | 0.45        | 0.78        | 0.55        | 0.77        | 0.08         | 0.98             | 0.51        | 0.54        | 0.82           |
| F10       | 0.55        | 0.08         | 0.47        | 0.81        | 0.56        | 0.79        | 0.08         | 1.02             | 0.52        | 0.55        | 0.85           |
| F11       | 0.40        | 0.04         | 0.33        | 0.58        | 0.39        | 0.56        | 0.07         | 0.75             | 0.38        | 0.39        | 0.61           |
| F12       | 0.71        | 0.11         | 0.63        | 0.80        | 0.66        | 0.81        | 0.13         | 0.89             | 0.69        | 0.68        | 0.82           |
| F13       | 0.35        | -0.04        | 0.26        | 0.50        | 0.31        | 0.51        | -0.04        | 0.63             | 0.32        | 0.34        | 0.51           |
| F14       | 0.99        | 0.69         | 0.92        | 1.11        | 0.94        | 1.15        | 0.69         | 1.28             | 0.97        | 0.97        | 1.15           |
| F15       | 0.38        | 0.08         | 0.14        | 0.46        | 0.30        | 0.47        | 0.08         | 0.58             | 0.33        | 0.33        | 0.48           |
| F16       | 0.54        | 0.08         | 0.44        | 0.77        | 0.54        | 0.75        | 0.08         | 0.96             | 0.51        | 0.52        | 0.81           |
| F17       | 0.22        | -0.04        | 0.16        | 0.38        | 0.20        | 0.36        | -0.05        | 0.52             | 0.20        | 0.22        | 0.41           |
| F18       | 0.19        | -0.11        | 0.12        | 0.36        | 0.16        | 0.35        | -0.11        | 0.53             | 0.16        | 0.18        | 0.40           |
| F19       | 0.26        | -0.07        | 0.19        | 0.46        | 0.23        | 0.44        | -0.07        | 0.64             | 0.24        | 0.26        | 0.50           |
| F20       | 0.56        | 0.16         | 0.47        | 0.77        | 0.54        | 0.79        | 0.17         | 0.99             | 0.53        | 0.55        | 0.81           |
| F21       | 0.44        | 0.10         | 0.36        | 0.59        | 0.42        | 0.58        | 0.10         | 0.75             | 0.41        | 0.42        | 0.63           |
| F22       | 0.31        | -0.03        | 0.23        | 0.48        | 0.30        | 0.46        | -0.03        | 0.64             | 0.28        | 0.30        | 0.51           |
| F23       | 0.44        | -0.06        | 0.34        | 0.73        | 0.40        | 0.75        | -0.06        | 0.98             | 0.42        | 0.44        | 0.77           |
| F24       | 0.52        | 0.19         | 0.43        | 0.63        | 0.44        | 0.66        | 0.19         | 0.75             | 0.49        | 0.49        | 0.65           |
| F25       | 0.55        | 0.29         | 0.49        | 0.62        | 0.48        | 0.65        | 0.29         | 0.72             | 0.54        | 0.53        | 0.65           |
| F26       | 0.40        | -0.06        | 0.32        | 0.57        | 0.37        | 0.55        | -0.04        | 0.72             | 0.38        | 0.38        | 0.60           |
| F27       | 0.55        | 0.20         | 0.44        | 0.73        | 0.55        | 0.73        | 0.20         | 0.88             | 0.51        | 0.54        | 0.76           |
| F28       | 0.52        | 0.17         | 0.46        | 0.70        | 0.52        | 0.66        | 0.18         | 0.84             | 0.50        | 0.51        | 0.72           |
| F29       | 0.53        | 0.19         | 0.45        | 0.59        | 0.48        | 0.63        | 0.19         | 0.74             | 0.50        | 0.52        | 0.60           |
| F30       | <b>0.40</b> | <b>-0.11</b> | <b>0.33</b> | <b>0.51</b> | <b>0.36</b> | <b>0.52</b> | <b>-0.09</b> | <b>0.61</b>      | <b>0.38</b> | <b>0.38</b> | <b>0.53</b>    |
| MSE       | <b>0.44</b> | <b>0.03</b>  | <b>0.34</b> | <b>0.63</b> | <b>0.41</b> | <b>0.63</b> | <b>0.03</b>  | <b>0.80</b>      | <b>0.41</b> | <b>0.43</b> | <b>0.66</b>    |
| MAE       | <b>0.45</b> | <b>0.20</b>  | <b>0.37</b> | <b>0.63</b> | <b>0.42</b> | <b>0.63</b> | <b>0.20</b>  | <b>0.80</b>      | <b>0.42</b> | <b>0.43</b> | <b>0.66</b>    |
| RMSE      | <b>0.49</b> | <b>0.29</b>  | <b>0.41</b> | <b>0.65</b> | <b>0.46</b> | <b>0.65</b> | <b>0.29</b>  | <b>0.83</b>      | <b>0.46</b> | <b>0.47</b> | <b>0.69</b>    |

**S5. The specific data of the calculated excited energies of the studied compounds**

**Table S.3. The calculated excited energies of coumarin derivatives using 11 DFT functionals (eV)**

| Compounds  | PBE0 | PBE  | B3LYP | CAM-B3LYP | M06  | M06-2X | BP86 | LC- $\omega$ PBE | APFD | PW6B95D3 | $\omega$ B97XD |
|------------|------|------|-------|-----------|------|--------|------|------------------|------|----------|----------------|
| <b>F1</b>  | 3.79 | 3.32 | 3.69  | 4.00      | 3.76 | 4.00   | 3.33 | 4.20             | 3.76 | 3.77     | 4.03           |
| <b>F2</b>  | 3.32 | 2.92 | 3.23  | 3.50      | 3.31 | 3.48   | 2.92 | 3.66             | 3.29 | 3.30     | 3.53           |
| <b>F3</b>  | 3.68 | 3.16 | 3.58  | 3.94      | 3.65 | 3.96   | 3.16 | 4.15             | 3.65 | 3.68     | 3.95           |
| <b>F4</b>  | 3.70 | 3.33 | 3.63  | 3.85      | 3.66 | 3.88   | 3.34 | 4.00             | 3.68 | 3.69     | 3.88           |
| <b>F5</b>  | 3.79 | 3.45 | 3.71  | 3.92      | 3.72 | 3.95   | 3.45 | 4.07             | 3.77 | 3.77     | 3.94           |
| <b>F6</b>  | 3.11 | 2.69 | 3.02  | 3.31      | 3.11 | 3.29   | 2.69 | 3.47             | 3.08 | 3.10     | 3.34           |
| <b>F7</b>  | 3.49 | 2.56 | 3.37  | 3.80      | 3.49 | 3.79   | 2.60 | 4.06             | 3.46 | 3.49     | 3.86           |
| <b>F8</b>  | 3.43 | 2.61 | 3.36  | 3.54      | 3.39 | 3.53   | 2.64 | 3.65             | 3.41 | 3.41     | 3.56           |
| <b>F9</b>  | 3.47 | 2.95 | 3.37  | 3.75      | 3.47 | 3.75   | 2.96 | 3.99             | 3.43 | 3.47     | 3.79           |
| <b>F10</b> | 3.43 | 2.91 | 3.33  | 3.72      | 3.44 | 3.71   | 2.92 | 3.96             | 3.40 | 3.43     | 3.77           |
| <b>F11</b> | 3.23 | 2.78 | 3.14  | 3.47      | 3.23 | 3.46   | 2.79 | 3.69             | 3.21 | 3.23     | 3.51           |
| <b>F12</b> | 3.71 | 3.35 | 3.63  | 3.85      | 3.67 | 3.86   | 3.35 | 3.97             | 3.69 | 3.69     | 3.86           |
| <b>F13</b> | 3.52 | 3.05 | 3.42  | 3.71      | 3.48 | 3.73   | 3.05 | 3.90             | 3.49 | 3.51     | 3.75           |
| <b>F14</b> | 3.90 | 3.48 | 3.80  | 4.09      | 3.84 | 4.13   | 3.46 | 4.31             | 3.86 | 3.89     | 4.12           |
| <b>F15</b> | 4.01 | 3.57 | 3.92  | 4.20      | 3.96 | 4.23   | 3.58 | 4.40             | 3.99 | 4.00     | 4.23           |
| <b>F16</b> | 3.53 | 3.01 | 3.43  | 3.80      | 3.53 | 3.79   | 3.02 | 4.01             | 3.49 | 3.52     | 3.84           |
| <b>F17</b> | 2.95 | 2.61 | 2.87  | 3.16      | 2.94 | 3.13   | 2.61 | 3.34             | 2.92 | 2.95     | 3.19           |
| <b>F18</b> | 3.15 | 2.73 | 3.07  | 3.29      | 3.12 | 3.27   | 2.82 | 3.43             | 3.12 | 3.12     | 3.32           |
| <b>F19</b> | 3.26 | 2.82 | 3.17  | 3.51      | 3.25 | 3.48   | 2.82 | 3.72             | 3.24 | 3.26     | 3.55           |
| <b>F20</b> | 3.48 | 3.03 | 3.38  | 3.71      | 3.45 | 3.73   | 3.03 | 3.95             | 3.44 | 3.47     | 3.76           |
| <b>F21</b> | 3.18 | 2.84 | 3.11  | 3.33      | 3.16 | 3.32   | 2.84 | 3.49             | 3.16 | 3.16     | 3.37           |
| <b>F22</b> | 3.14 | 2.82 | 3.07  | 3.29      | 3.12 | 3.27   | 2.82 | 3.43             | 3.12 | 3.12     | 3.32           |
| <b>F23</b> | 4.41 | 3.97 | 4.31  | 5.61      | 4.29 | 4.41   | 3.97 | 5.88             | 4.38 | 4.41     | 5.66           |
| <b>F24</b> | 4.41 | 4.00 | 4.32  | 4.58      | 4.34 | 4.61   | 4.00 | 4.75             | 4.38 | 4.40     | 4.59           |
| <b>F25</b> | 4.13 | 3.73 | 4.04  | 4.28      | 4.05 | 4.32   | 3.73 | 4.46             | 4.11 | 4.12     | 4.31           |
| <b>F26</b> | 3.36 | 2.85 | 3.27  | 3.57      | 3.32 | 3.55   | 2.87 | 3.75             | 3.33 | 3.35     | 3.60           |
| <b>F27</b> | 3.44 | 2.63 | 3.34  | 3.70      | 3.42 | 3.71   | 2.65 | 3.92             | 3.40 | 3.45     | 3.73           |
| <b>F28</b> | 3.23 | 2.88 | 3.16  | 3.38      | 3.22 | 3.35   | 2.89 | 3.51             | 3.20 | 3.21     | 3.41           |
| <b>F29</b> | 3.52 | 2.26 | 3.34  | 4.09      | 3.53 | 4.12   | 2.29 | 4.26             | 3.43 | 3.61     | 4.11           |
| <b>F30</b> | 3.64 | 3.27 | 3.55  | 3.79      | 3.59 | 3.80   | 3.12 | 3.94             | 3.62 | 3.63     | 3.82           |

**Table S.4. The difference between the calculated Stokes shift and the experimental Stokes shift of coumarin derivatives using 11 DFT functionals (eV)**

| Compounds   | PBE0        | PBE         | B3LYP       | CAM-B3LYP   | M06         | M06-2X      | BP86        | LC- $\omega$ PBE | APFD        | PW6B95D3    | $\omega$ B97XD |
|-------------|-------------|-------------|-------------|-------------|-------------|-------------|-------------|------------------|-------------|-------------|----------------|
| <b>F1</b>   | 0.40        | 0.50        | 0.41        | 0.33        | 0.40        | 0.33        | 0.50        | 0.27             | 0.40        | 0.40        | 0.34           |
| <b>F2</b>   | -0.53       | -0.76       | -0.56       | -0.17       | -0.48       | -0.16       | -0.75       | -0.04            | -0.55       | -0.46       | -0.17          |
| <b>F3</b>   | 0.20        | 0.30        | 0.21        | 0.16        | 0.21        | 0.15        | 0.29        | 0.13             | 0.20        | 0.20        | 0.16           |
| <b>F4</b>   | 0.24        | 0.31        | 0.24        | 0.18        | 0.22        | 0.16        | 0.30        | 0.12             | 0.23        | 0.23        | 0.16           |
| <b>F5</b>   | 0.01        | 0.08        | 0.03        | -0.04       | 0.02        | -0.05       | 0.08        | -0.09            | 0.02        | 0.02        | -0.04          |
| <b>F6</b>   | 0.15        | 0.15        | 0.15        | 0.16        | 0.15        | 0.15        | 0.15        | 0.16             | 0.15        | 0.15        | 0.16           |
| <b>F7</b>   | -0.17       | -0.11       | -0.23       | 0.34        | -0.09       | 0.26        | -0.14       | 0.67             | -0.20       | -0.13       | 0.47           |
| <b>F8</b>   | 0.11        | 0.44        | 0.10        | 0.16        | 0.11        | 0.17        | 0.43        | 0.18             | 0.11        | 0.12        | 0.16           |
| <b>F9</b>   | 0.42        | 0.47        | 0.44        | 0.39        | 0.43        | 0.38        | 0.47        | 0.34             | 0.43        | 0.41        | 0.38           |
| <b>F10</b>  | 0.42        | 0.46        | 0.43        | 0.39        | 0.42        | 0.38        | 0.46        | 0.36             | 0.42        | 0.42        | 0.38           |
| <b>F11</b>  | 0.28        | 0.36        | 0.29        | 0.21        | 0.26        | 0.19        | 0.39        | 0.16             | 0.26        | 0.26        | 0.19           |
| <b>F12</b>  | -0.04       | -0.28       | -0.03       | -0.09       | -0.05       | -0.09       | -0.26       | -0.12            | -0.04       | -0.05       | -0.08          |
| <b>F13</b>  | 0.27        | 0.35        | 0.29        | 0.23        | 0.27        | 0.21        | 0.35        | 0.17             | 0.27        | 0.27        | 0.21           |
| <b>F14</b>  | 0.31        | 0.42        | 0.33        | 0.24        | 0.32        | 0.23        | 0.44        | 0.19             | 0.33        | 0.31        | 0.25           |
| <b>F15</b>  | 0.20        | 0.33        | 0.05        | 0.08        | 0.17        | 0.07        | 0.32        | 0.01             | 0.17        | 0.16        | 0.08           |
| <b>F16</b>  | 0.33        | 0.39        | 0.34        | 0.29        | 0.33        | 0.28        | 0.38        | 0.27             | 0.34        | 0.33        | 0.30           |
| <b>F17</b>  | -0.02       | 0.05        | -0.01       | -0.08       | -0.04       | -0.07       | 0.04        | -0.12            | -0.02       | -0.03       | -0.08          |
| <b>F18</b>  | -0.12       | 0.00        | -0.11       | -0.08       | -0.12       | -0.08       | -0.09       | -0.05            | -0.11       | -0.10       | -0.07          |
| <b>F19</b>  | 0.04        | 0.15        | 0.05        | -0.01       | 0.02        | -0.01       | 0.15        | -0.05            | 0.04        | 0.03        | -0.02          |
| <b>F20</b>  | 0.31        | 0.36        | 0.32        | 0.29        | 0.31        | 0.28        | 0.37        | 0.27             | 0.32        | 0.30        | 0.28           |
| <b>F21</b>  | 0.10        | 0.10        | 0.10        | 0.10        | 0.10        | 0.11        | 0.10        | 0.10             | 0.10        | 0.10        | 0.10           |
| <b>F22</b>  | -0.04       | -0.07       | -0.05       | -0.02       | -0.04       | -0.02       | -0.07       | 0.00             | -0.05       | -0.04       | -0.02          |
| <b>F23</b>  | 0.49        | 0.42        | 0.49        | -0.42       | 0.57        | 0.80        | 0.42        | -0.43            | 0.50        | 0.49        | -0.43          |
| <b>F24</b>  | 0.53        | 0.62        | 0.54        | 0.49        | 0.54        | 0.48        | 0.62        | 0.43             | 0.54        | 0.52        | 0.48           |
| <b>F25</b>  | 0.22        | 0.36        | 0.25        | 0.15        | 0.23        | 0.13        | 0.36        | 0.06             | 0.24        | 0.21        | 0.14           |
| <b>F26</b>  | 0.48        | 0.53        | 0.49        | 0.45        | 0.49        | 0.44        | 0.53        | 0.41             | 0.49        | 0.48        | 0.44           |
| <b>F27</b>  | 0.13        | 0.60        | 0.13        | 0.07        | 0.15        | 0.05        | 0.58        | 0.00             | 0.13        | 0.13        | 0.06           |
| <b>F28</b>  | 0.10        | 0.09        | 0.11        | 0.12        | 0.11        | 0.12        | 0.10        | 0.13             | 0.10        | 0.10        | 0.12           |
| <b>F29</b>  | 0.70        | 1.61        | 0.80        | 0.19        | 0.63        | 0.19        | 1.60        | 0.17             | 0.76        | 0.60        | 0.18           |
| <b>F30</b>  | 0.23        | 0.08        | 0.24        | 0.18        | 0.23        | 0.18        | 0.25        | 0.14             | 0.23        | 0.22        | 0.18           |
| <b>MSE</b>  | <b>0.19</b> | <b>0.28</b> | <b>0.19</b> | <b>0.14</b> | <b>0.20</b> | <b>0.18</b> | <b>0.28</b> | <b>0.13</b>      | <b>0.19</b> | <b>0.19</b> | <b>0.14</b>    |
| <b>MAE</b>  | <b>0.25</b> | <b>0.36</b> | <b>0.26</b> | <b>0.20</b> | <b>0.25</b> | <b>0.21</b> | <b>0.37</b> | <b>0.19</b>      | <b>0.26</b> | <b>0.24</b> | <b>0.20</b>    |
| <b>RMSE</b> | <b>0.31</b> | <b>0.47</b> | <b>0.32</b> | <b>0.24</b> | <b>0.31</b> | <b>0.26</b> | <b>0.47</b> | <b>0.24</b>      | <b>0.32</b> | <b>0.29</b> | <b>0.25</b>    |

**S6. The optimized complex configurations between F1 and MeOH and their coordinates**

**S6.1. The complex configurations with an F1: MeOH molar ratio of 1:1**

**S6.1.1. F1-MeOH-1**

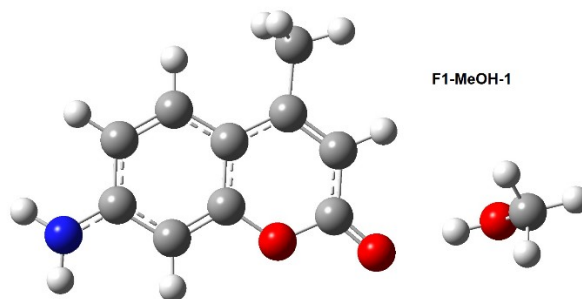

**Fig.S5. The optimized complex configuration of F1-MeOH-1**

**The coordinates of F1-MeOH-1**

|   |             |             |             |
|---|-------------|-------------|-------------|
| O | 0.11208100  | -1.27378700 | -0.14508900 |
| O | 2.30052900  | -1.36690100 | -0.30287700 |
| N | -4.60588000 | -1.44675700 | 0.22723300  |
| C | -1.07920500 | 0.81339900  | -0.02487500 |
| C | 0.17179800  | 1.51324800  | -0.09754800 |
| C | -1.06147400 | -0.58992800 | -0.05071000 |
| C | -2.34077800 | 1.42970300  | 0.07070200  |
| C | -2.21215100 | -1.35407600 | 0.01532600  |
| C | -3.45516200 | -0.72004200 | 0.11195600  |
| C | 1.32207400  | 0.78857100  | -0.19023300 |
| C | -3.49838200 | 0.69292000  | 0.13829700  |
| C | 0.20723000  | 3.00578100  | -0.07077300 |
| C | 1.32014400  | -0.64224200 | -0.21878700 |
| H | -2.40318000 | 2.51199900  | 0.09096200  |
| H | -2.13355400 | -2.43540300 | -0.00831300 |
| H | 2.29157800  | 1.26783500  | -0.24915800 |
| H | -4.45811700 | 1.19355600  | 0.21293800  |
| H | -0.24292500 | 3.38736000  | 0.85083200  |
| H | -0.36516100 | 3.42203700  | -0.90542500 |
| H | 1.23129300  | 3.37383200  | -0.13493400 |
| H | -4.58594800 | -2.41981900 | -0.03218700 |
| H | -5.48079000 | -0.98093700 | 0.04829800  |
| C | 5.42139100  | -0.33312800 | 0.82086200  |

|   |            |             |             |
|---|------------|-------------|-------------|
| H | 6.45993200 | 0.00052400  | 0.76363000  |
| H | 4.84907500 | 0.42707600  | 1.36876800  |
| H | 5.39432200 | -1.26753700 | 1.39637800  |
| O | 4.94863400 | -0.50697300 | -0.49815400 |
| H | 4.02177400 | -0.79718100 | -0.44877100 |

### S6.1.2. F1-MeOH-2

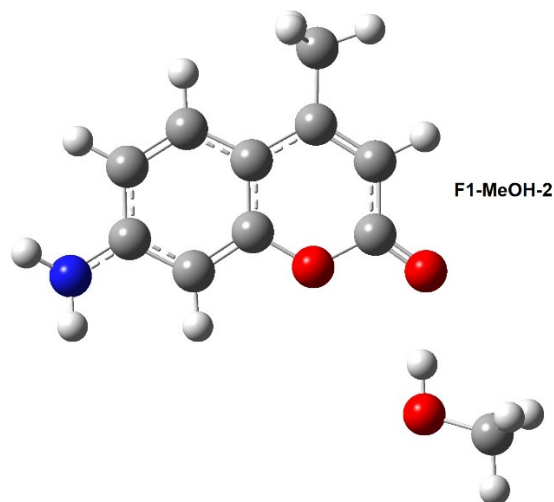

Fig.S6. The optimized complex configuration of F1-MeOH-2

### The coordinates of F1-MeOH-2

|   |             |             |             |
|---|-------------|-------------|-------------|
| O | 0.74472500  | 0.26743400  | 0.05527500  |
| O | 2.61636500  | -0.89055900 | 0.08024500  |
| N | -3.08393200 | 3.05495900  | 0.04509700  |
| C | -1.41326500 | -0.79438600 | -0.00703800 |
| C | -0.76480000 | -2.07526300 | -0.00848300 |
| C | -0.61363700 | 0.35875800  | 0.02605300  |
| C | -2.80647300 | -0.59863800 | -0.03896300 |
| C | -1.14227800 | 1.63639300  | 0.02863300  |
| C | -2.53010800 | 1.80709100  | -0.00314500 |
| C | 0.59668200  | -2.11983200 | 0.02177100  |
| C | -3.35653300 | 0.66054100  | -0.03658000 |
| C | -1.57134800 | -3.33141400 | -0.04228500 |
| C | 1.39572400  | -0.93343400 | 0.05369900  |
| H | -3.46339600 | -1.46080600 | -0.06734500 |
| H | -0.47244900 | 2.48871800  | 0.05496000  |
| H | 1.13606800  | -3.05875100 | 0.02223900  |
| H | -4.43436100 | 0.78357200  | -0.06092000 |
| H | -2.20121400 | -3.36362900 | -0.93661200 |



|   |             |             |             |
|---|-------------|-------------|-------------|
| H | -2.23807200 | -3.38695400 | 0.82372600  |
| H | -0.92640100 | -4.21019200 | -0.04052000 |
| H | -2.49974500 | 3.84576200  | -0.17419200 |
| H | -4.04795700 | 3.15544100  | -0.22878500 |
| C | 5.46889100  | 1.02192000  | -0.15865900 |
| H | 6.11329800  | 1.90399200  | -0.15197700 |
| H | 5.56408600  | 0.53777300  | -1.13942300 |
| H | 5.83549100  | 0.32605600  | 0.60726200  |
| O | 4.14802100  | 1.44810400  | 0.09836500  |
| H | 3.57216600  | 0.66405300  | 0.09481000  |

### S6.1.3. F1-MeOH-3

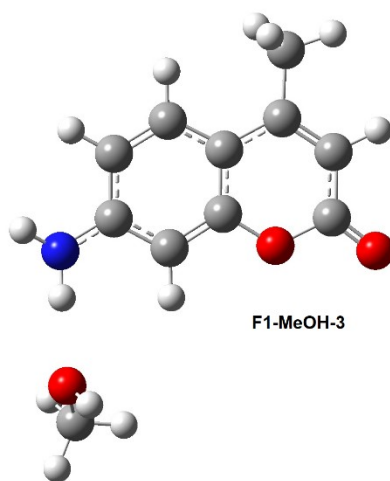

**Fig.S7. The optimized complex configuration of F1-MeOH-3**

### The coordinates of F1-MeOH-3

|   |             |             |             |
|---|-------------|-------------|-------------|
| O | 0.78915800  | 1.55138300  | -0.02610400 |
| O | 2.30031700  | 3.15684900  | -0.04721700 |
| N | -2.70316200 | -1.63888200 | 0.04773300  |
| C | 1.40207500  | -0.77598700 | 0.01586700  |
| C | 2.78619100  | -0.39576600 | 0.01679600  |
| C | 0.43035800  | 0.23833400  | -0.00538600 |
| C | 0.93238200  | -2.10264000 | 0.03300600  |
| C | -0.92612400 | -0.02779800 | -0.00793100 |
| C | -1.37401400 | -1.35599400 | 0.01232700  |
| C | 3.10245700  | 0.92877900  | -0.00384000 |
| C | -0.41058900 | -2.39319800 | 0.03177000  |
| C | 3.85623200  | -1.43825800 | 0.04006900  |
| C | 2.10293800  | 1.95818800  | -0.02698800 |

|   |             |             |             |
|---|-------------|-------------|-------------|
| H | 1.64758000  | -2.91785400 | 0.04679300  |
| H | -1.63137800 | 0.79559700  | -0.02542700 |
| H | 4.13155100  | 1.26656000  | -0.00402300 |
| H | -0.74381100 | -3.42593300 | 0.04530000  |
| H | 3.77466400  | -2.09811700 | -0.82921100 |
| H | 3.76604700  | -2.06751800 | 0.93091300  |
| H | 4.84647400  | -0.98215400 | 0.03695300  |
| H | -3.37614600 | -0.90631000 | -0.16410700 |
| H | -2.99653400 | -2.58598000 | -0.12521200 |
| C | -4.98603900 | 1.45412500  | 0.48633500  |
| H | -5.97268900 | 1.88280400  | 0.28365300  |
| H | -5.02880600 | 0.90883500  | 1.42983200  |
| H | -4.25379400 | 2.26291600  | 0.57997700  |
| O | -4.61086700 | 0.52003200  | -0.51782600 |
| H | -4.56510000 | 0.97451800  | -1.36253400 |

#### S6.1.4. F1-MeOH-4

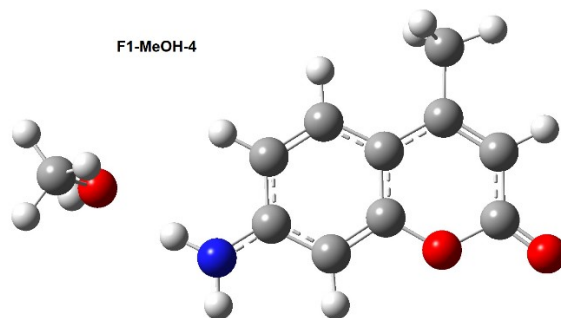

Fig.S8. The optimized complex configuration of F1-MeOH-4

#### The coordinates of F1-MeOH-4

|   |             |             |             |
|---|-------------|-------------|-------------|
| O | 2.14601700  | -1.46611200 | 0.02690400  |
| O | 4.34359100  | -1.64381400 | 0.05765200  |
| N | -2.59233300 | -1.42557900 | -0.00699800 |
| C | 1.03984300  | 0.67155800  | -0.00866500 |
| C | 2.32150700  | 1.31748800  | 0.00315200  |
| C | 0.99955200  | -0.73250700 | 0.00401800  |
| C | -0.19882400 | 1.34067800  | -0.03517600 |
| C | -0.18539600 | -1.44520600 | -0.00666600 |
| C | -1.40768000 | -0.76032200 | -0.03100500 |
| C | 3.44444800  | 0.54694200  | 0.02591500  |
| C | -1.38960500 | 0.65603000  | -0.04592300 |

|   |             |             |             |
|---|-------------|-------------|-------------|
| C | 2.41694700  | 2.80855200  | -0.00938600 |
| C | 3.39341200  | -0.88679000 | 0.03813300  |
| H | -0.21517800 | 2.42510900  | -0.04888200 |
| H | -0.15265500 | -2.52930000 | 0.00447300  |
| H | 4.43435500  | 0.98639000  | 0.03552300  |
| H | -2.33267400 | 1.19191900  | -0.06962000 |
| H | 1.90899000  | 3.23763200  | 0.85984000  |
| H | 1.93396200  | 3.22122600  | -0.90053300 |
| H | 3.45750100  | 3.13371300  | 0.00229000  |
| H | -2.59596400 | -2.41811900 | -0.17318000 |
| H | -3.45097000 | -0.92082600 | -0.21234600 |
| C | -5.92760200 | 0.39660300  | 0.53502700  |
| H | -5.36349200 | 0.48007400  | 1.46471500  |
| H | -6.62111200 | -0.44657100 | 0.61846100  |
| H | -6.49770300 | 1.31918600  | 0.38629600  |
| O | -4.98273900 | 0.19751000  | -0.50861700 |
| H | -5.45329900 | 0.11977900  | -1.34211800 |

## S6.2. The complex configurations with an F1: MeOH molar ratio of 1:2

### S6.2.1. F1-2MeOH-1

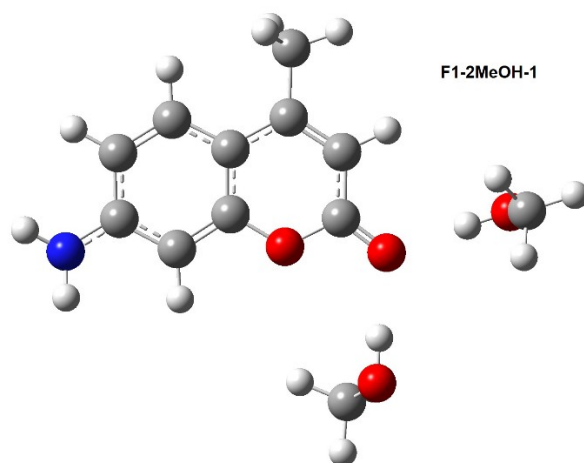

Fig.S9. The optimized complex configuration of F1-2MeOH-1

#### The coordinates of F1-2MeOH-1

|   |             |             |             |
|---|-------------|-------------|-------------|
| O | -0.00247800 | -0.67007000 | -0.03052900 |
| O | -2.16786700 | -0.34119300 | 0.08906500  |
| N | 4.59747400  | -1.75854200 | -0.27882000 |
| C | 1.58245500  | 1.13624600  | 0.07253500  |

|   |             |             |             |
|---|-------------|-------------|-------------|
| C | 0.49451100  | 2.06004800  | 0.20515000  |
| C | 1.28752200  | -0.23143000 | -0.04240800 |
| C | 2.94423300  | 1.49382900  | 0.04554900  |
| C | 2.26221200  | -1.20198600 | -0.17419000 |
| C | 3.60882300  | -0.82328600 | -0.19642200 |
| C | -0.78090100 | 1.57397400  | 0.21250700  |
| C | 3.93247600  | 0.54954200  | -0.08441400 |
| C | 0.75464000  | 3.52435100  | 0.33248700  |
| C | -1.05397700 | 0.17975200  | 0.09248200  |
| H | 3.22099500  | 2.53891900  | 0.12792200  |
| H | 1.96961100  | -2.24269400 | -0.25815900 |
| H | -1.63909900 | 2.22703500  | 0.31094700  |
| H | 4.97441900  | 0.85179200  | -0.10207100 |
| H | 1.29358000  | 3.89874100  | -0.54324600 |
| H | 1.37799300  | 3.73152500  | 1.20762700  |
| H | -0.17743900 | 4.08074700  | 0.43039100  |
| H | 4.35899000  | -2.68906700 | -0.58119700 |
| H | 5.52567400  | -1.45480700 | -0.52403600 |
| C | -1.91781800 | -3.80494500 | 0.67983200  |
| H | -2.06882800 | -4.87089500 | 0.49511100  |
| H | -0.83783600 | -3.60999600 | 0.69838300  |
| H | -2.32899500 | -3.56847000 | 1.66998300  |
| O | -2.56744700 | -3.09069200 | -0.35036600 |
| H | -2.40919800 | -2.14320400 | -0.20405800 |
| C | -5.04610400 | 1.37291600  | -0.87851900 |
| H | -5.98659600 | 1.91761600  | -0.77014900 |
| H | -4.34154900 | 2.01381700  | -1.42459300 |
| H | -5.23805400 | 0.47640000  | -1.48198000 |
| O | -4.58012400 | 1.05268300  | 0.41579900  |
| H | -3.74109100 | 0.57244200  | 0.32157200  |

### S6.2.2. F1-2MeOH-2

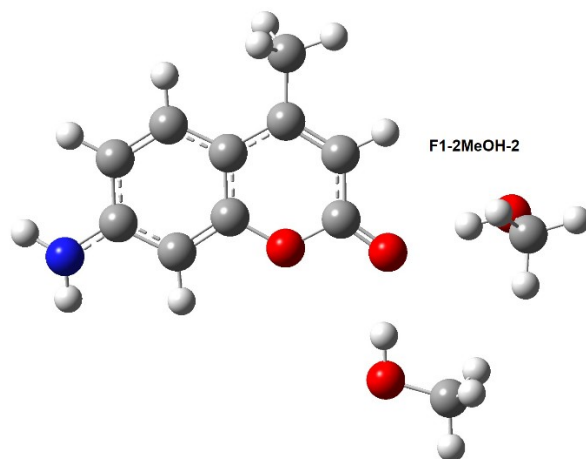

**Fig.S10. The optimized complex configuration of F1-2MeOH-2**

**The coordinates of F1-2MeOH-2**

|   |             |             |             |
|---|-------------|-------------|-------------|
| O | 0.10637000  | 0.69999800  | -0.05480500 |
| O | -2.01529000 | 0.16224200  | -0.19637400 |
| N | 4.57287700  | 2.22595400  | 0.29755400  |
| C | 1.85595100  | -0.95075000 | -0.05088100 |
| C | 0.86244700  | -1.97860100 | -0.15549000 |
| C | 1.43144800  | 0.38646700  | -0.00204200 |
| C | 3.24487100  | -1.17570600 | 0.00564400  |
| C | 2.30809700  | 1.44973700  | 0.09782400  |
| C | 3.68388100  | 1.20217400  | 0.15383000  |
| C | -0.45264400 | -1.61652600 | -0.20330700 |
| C | 4.13753300  | -0.13720500 | 0.10547100  |
| C | 1.26099900  | -3.41606100 | -0.21098400 |
| C | -0.85784400 | -0.25041400 | -0.15531100 |
| H | 3.62010000  | -2.19222100 | -0.03146900 |
| H | 1.91787000  | 2.46073700  | 0.13069000  |
| H | -1.24316100 | -2.35223300 | -0.28267200 |
| H | 5.20290000  | -0.33832900 | 0.14808600  |
| H | 1.82487900  | -3.69613800 | 0.68400900  |
| H | 1.90912700  | -3.60431100 | -1.07240500 |
| H | 0.38631300  | -4.06201200 | -0.28687400 |
| H | 4.26297300  | 3.16540000  | 0.10851600  |
| H | 5.54467800  | 2.04947100  | 0.10147900  |
| C | -4.14688600 | 2.88025800  | -0.21851600 |
| H | -4.48212500 | 3.91980700  | -0.20730700 |
| H | -4.61979400 | 2.36027700  | 0.62492800  |
| H | -4.49777800 | 2.41824800  | -1.15038600 |

|   |             |             |             |
|---|-------------|-------------|-------------|
| O | -2.73811200 | 2.87899900  | -0.12182400 |
| H | -2.43615000 | 1.95586700  | -0.14285300 |
| C | -4.84774800 | -1.50877900 | 0.93101500  |
| H | -5.75398100 | -2.11695800 | 0.88819300  |
| H | -4.14763000 | -1.98794700 | 1.62770200  |
| H | -5.11656200 | -0.52331700 | 1.33316400  |
| O | -4.32174000 | -1.42343800 | -0.37697200 |
| H | -3.51225500 | -0.88799000 | -0.33940100 |

### S6.2.3. F1-2MeOH-3

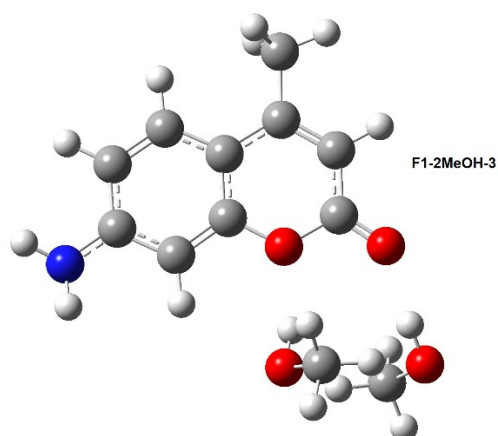

Fig.S11. The optimized complex configuration of F1-2MeOH-3

### The coordinates of F1-2MeOH-3

|   |             |             |             |
|---|-------------|-------------|-------------|
| O | -0.44126100 | 0.12814400  | -0.08228200 |
| O | -2.06811400 | 1.58180000  | -0.39068600 |
| N | 2.80815700  | -3.24224900 | 0.65080500  |
| C | 1.87032200  | 0.79133300  | -0.02250000 |
| C | 1.46809400  | 2.15121600  | -0.24359500 |
| C | 0.87828300  | -0.19833700 | 0.05172700  |
| C | 3.20258600  | 0.36201500  | 0.12520200  |
| C | 1.16376400  | -1.53458900 | 0.25699700  |
| C | 2.49611800  | -1.93763700 | 0.40184100  |
| C | 0.14014500  | 2.43148300  | -0.37054500 |
| C | 3.51462000  | -0.95956300 | 0.33264400  |
| C | 2.48872900  | 3.23751800  | -0.33016700 |
| C | -0.86380300 | 1.41817400  | -0.29008400 |
| H | 4.00410500  | 1.09034000  | 0.07338700  |
| H | 0.35414400  | -2.25488700 | 0.30050400  |
| H | -0.21570200 | 3.44052100  | -0.53640100 |
| H | 4.55044400  | -1.26261500 | 0.44457100  |

|   |             |             |             |
|---|-------------|-------------|-------------|
| H | 3.19229000  | 3.04413800  | -1.14570200 |
| H | 3.07299700  | 3.29431000  | 0.59340300  |
| H | 2.01641200  | 4.20479800  | -0.50157700 |
| H | 2.11142300  | -3.94659900 | 0.46944500  |
| H | 3.75980100  | -3.54056300 | 0.51062200  |
| C | -2.93051700 | -1.82241100 | -2.14514900 |
| H | -3.44936300 | -2.73150300 | -2.45469500 |
| H | -2.20697100 | -1.55561100 | -2.92516000 |
| H | -3.66836200 | -1.01585400 | -2.05913100 |
| O | -2.29911700 | -2.09496700 | -0.90759300 |
| H | -1.83424900 | -1.29957800 | -0.62626600 |
| C | -3.93249700 | -0.00383200 | 2.12860000  |
| H | -4.82367400 | -0.34902500 | 2.65729200  |
| H | -3.25978200 | -0.86107700 | 1.99689700  |
| H | -3.42830500 | 0.74054700  | 2.75841100  |
| O | -4.34763100 | 0.53962900  | 0.89268600  |
| H | -3.55838000 | 0.84933300  | 0.42194200  |

#### S6.2.4. F1-2MeOH-4

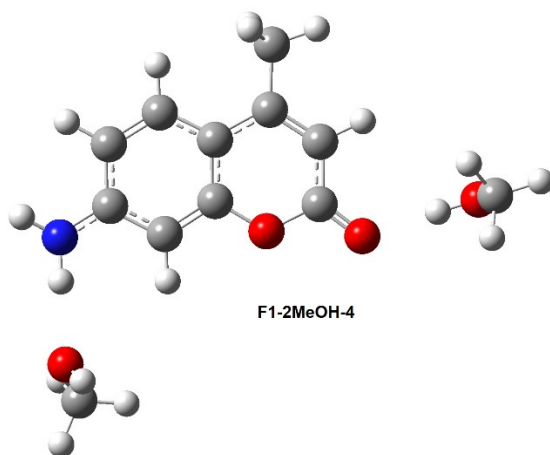

Fig.S12. The optimized complex configuration of F1-2MeOH-4

#### The coordinates of F1-2MeOH-4

|   |             |             |             |
|---|-------------|-------------|-------------|
| O | 0.45434200  | -0.80845000 | -0.14285200 |
| O | 2.46361900  | -1.68137800 | -0.29696700 |
| N | -4.01121700 | 0.71822500  | 0.15714200  |
| C | 0.08929400  | 1.56852700  | -0.04388300 |
| C | 1.50532400  | 1.77254600  | -0.12530900 |
| C | -0.39833300 | 0.25084400  | -0.05545000 |
| C | -0.86906000 | 2.59636200  | 0.05100600  |

|   |             |             |             |
|---|-------------|-------------|-------------|
| C | -1.74409300 | -0.05099900 | 0.02013600  |
| C | -2.68242800 | 0.98702800  | 0.11250100  |
| C | 2.32168600  | 0.68286600  | -0.21013200 |
| C | -2.21246900 | 2.32368400  | 0.12625800  |
| C | 2.07351200  | 3.15383700  | -0.11733600 |
| C | 1.80817900  | -0.65140600 | -0.22219200 |
| H | -0.53920300 | 3.62935500  | 0.06517200  |
| H | -2.06133200 | -1.08767300 | 0.00761600  |
| H | 3.39811000  | 0.78380000  | -0.27457500 |
| H | -2.92964400 | 3.13498900  | 0.19818000  |
| H | 1.79225400  | 3.68342000  | 0.79809800  |
| H | 1.68602800  | 3.73669100  | -0.95859100 |
| H | 3.16137500  | 3.13020000  | -0.18408600 |
| H | -4.33115200 | -0.23395600 | 0.31727300  |
| H | -4.64885300 | 1.46219000  | 0.38582400  |
| C | -4.95815700 | -2.96017000 | -0.52173300 |
| H | -5.68428000 | -3.75516200 | -0.32439700 |
| H | -5.28791700 | -2.39373200 | -1.39335800 |
| H | -3.98333300 | -3.40806300 | -0.74092900 |
| O | -4.88316200 | -2.04606100 | 0.56486400  |
| H | -4.59223300 | -2.51842900 | 1.34873000  |
| C | 5.72971200  | -1.83943400 | 0.85441900  |
| H | 6.81954500  | -1.89819100 | 0.80934000  |
| H | 5.46022800  | -0.92791600 | 1.40415400  |
| H | 5.36451400  | -2.70556600 | 1.42156300  |
| O | 5.24079300  | -1.82623300 | -0.46994100 |
| H | 4.27066900  | -1.76466400 | -0.43055200 |

### S6.2.5. F1-2MeOH-5

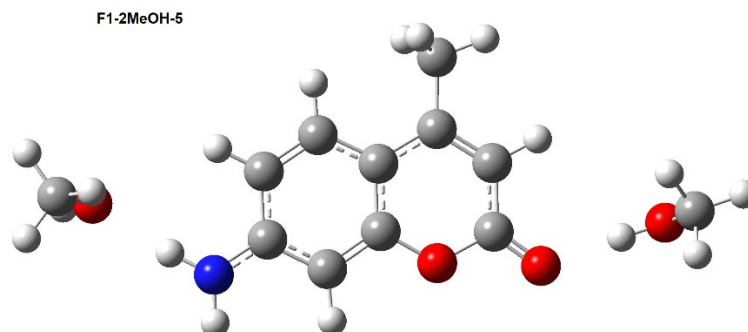

Fig.S13. The optimized complex configuration of F1-2MeOH-5

The coordinates of F1-2MeOH-5



|   |             |             |             |
|---|-------------|-------------|-------------|
| O | 1.20442500  | -1.28160100 | -0.16968200 |
| O | 3.39824600  | -1.34994200 | -0.24208000 |
| N | -3.52437900 | -1.50194500 | -0.00048700 |
| C | -0.01707800 | 0.79111100  | -0.11042300 |
| C | 1.22516100  | 1.50431600  | -0.14004600 |
| C | 0.01801300  | -0.61317900 | -0.12627300 |
| C | -1.29115700 | 1.39129000  | -0.06805200 |
| C | -1.12311300 | -1.39186000 | -0.10006000 |
| C | -2.38107000 | -0.77483900 | -0.05652700 |
| C | 2.38943600  | 0.79421600  | -0.18328500 |
| C | -2.44053000 | 0.64171100  | -0.04159100 |
| C | 1.24257000  | 2.99780000  | -0.12378300 |
| C | 2.40649100  | -0.63503200 | -0.20127000 |
| H | -1.36707100 | 2.47308800  | -0.05732100 |
| H | -1.02947500 | -2.47220600 | -0.11351500 |
| H | 3.35367000  | 1.28680400  | -0.20856200 |
| H | -3.41201700 | 1.12375500  | -0.01205600 |
| H | 0.75307000  | 3.38146100  | 0.77662800  |
| H | 0.69815400  | 3.40122800  | -0.98308100 |
| H | 2.26415200  | 3.37735800  | -0.15154900 |
| H | -3.48576200 | -2.49412300 | -0.16301000 |
| H | -4.42142000 | -1.04089700 | -0.13115800 |
| C | -6.92515200 | 0.11554200  | 0.78300100  |
| H | -6.32926500 | 0.17224500  | 1.69468200  |
| H | -7.58584100 | -0.75514500 | 0.84763900  |
| H | -7.53139700 | 1.02340600  | 0.70270700  |
| O | -6.01439900 | 0.00327300  | -0.30311700 |
| H | -6.51313300 | -0.05167700 | -1.12191600 |
| C | 6.46019500  | -0.27773900 | 0.98658700  |
| H | 7.49684100  | 0.06596700  | 0.96488800  |
| H | 5.86099900  | 0.48020800  | 1.50832500  |
| H | 6.42143300  | -1.20854200 | 1.56733700  |
| O | 6.03720100  | -0.46496900 | -0.34725000 |
| H | 5.11133000  | -0.76340500 | -0.32927200 |

#### S6.2.6. F1-2MeOH-6

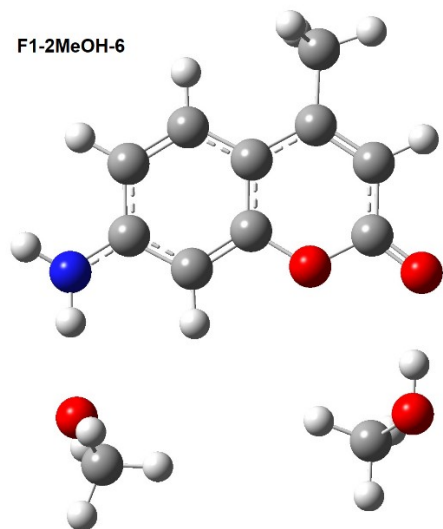

**Fig.S14. The optimized complex configuration of F1-2MeOH-6**

**The coordinates of F1-2MeOH-6**

|   |             |             |             |
|---|-------------|-------------|-------------|
| O | 0.71755300  | 0.93538700  | -0.11469400 |
| O | 2.04114400  | 2.69279200  | -0.16872900 |
| N | -2.41175400 | -2.60646100 | 0.01901000  |
| C | 1.57524800  | -1.30810200 | 0.03372500  |
| C | 2.90769200  | -0.77975500 | 0.04487000  |
| C | 0.49951400  | -0.40801600 | -0.04699100 |
| C | 1.24967900  | -2.67697000 | 0.09695900  |
| C | -0.81987400 | -0.81570000 | -0.06426700 |
| C | -1.12297500 | -2.18317200 | 0.00177700  |
| C | 3.07914000  | 0.57187900  | -0.02246400 |
| C | -0.05359300 | -3.10902000 | 0.08270900  |
| C | 4.08473100  | -1.69546000 | 0.12869600  |
| C | 1.97309200  | 1.47351900  | -0.10507500 |
| H | 2.04707200  | -3.40945200 | 0.15823200  |
| H | -1.60789600 | -0.07412000 | -0.13042100 |
| H | 4.06381100  | 1.02215800  | -0.01680900 |
| H | -0.27607000 | -4.16991000 | 0.13396900  |
| H | 4.09404100  | -2.39277000 | -0.71464100 |
| H | 4.04422900  | -2.29609200 | 1.04255300  |
| H | 5.01885800  | -1.13349600 | 0.12412900  |
| H | -3.16023600 | -1.95501500 | -0.20386000 |
| H | -2.60246700 | -3.58707800 | -0.10121000 |
| C | -1.13795100 | 4.03410400  | 0.55782100  |
| H | -1.98923600 | 4.70870100  | 0.44065900  |

|   |             |             |             |
|---|-------------|-------------|-------------|
| H | -1.50092900 | 3.00308400  | 0.45659400  |
| H | -0.73987500 | 4.16125500  | 1.57327900  |
| O | -0.18636300 | 4.36102900  | -0.43187200 |
| H | 0.56878500  | 3.75392400  | -0.33869700 |
| C | -4.90645300 | 0.30008000  | 0.43744500  |
| H | -5.92780200 | 0.65375000  | 0.26437200  |
| H | -4.87281600 | -0.21584600 | 1.39767400  |
| H | -4.22902900 | 1.15984700  | 0.47564700  |
| O | -4.50823300 | -0.63839400 | -0.55377100 |
| H | -4.53046200 | -0.21054100 | -1.41325400 |

### S6.2.7. F1-2MeOH-7

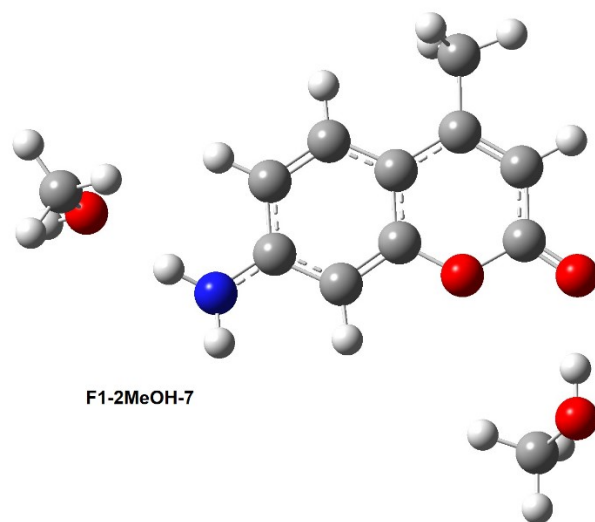

Fig.S15. The optimized complex configuration of F1-2MeOH-7

### The coordinates of F1-2MeOH-7

|   |             |             |             |
|---|-------------|-------------|-------------|
| O | -1.76674500 | -0.27833500 | -0.13141400 |
| O | -3.88970800 | 0.24923200  | -0.37630200 |
| N | 2.70379300  | -1.75096000 | 0.40987000  |
| C | -0.05499600 | 1.39309100  | 0.12541000  |
| C | -1.05894600 | 2.41149800  | 0.02964600  |
| C | -0.45521300 | 0.04937200  | 0.03920000  |
| C | 1.32252600  | 1.63246200  | 0.29907300  |
| C | 0.43469700  | -1.00462900 | 0.11901000  |
| C | 1.80081000  | -0.74466800 | 0.29395000  |
| C | -2.36001400 | 2.03799200  | -0.13979100 |
| C | 2.22802700  | 0.60419000  | 0.38187300  |

|   |             |             |             |
|---|-------------|-------------|-------------|
| C | -0.68420300 | 3.85491900  | 0.11444700  |
| C | -2.74984700 | 0.66571100  | -0.22546500 |
| H | 1.67793200  | 2.65475400  | 0.36806700  |
| H | 0.06347200  | -2.02093800 | 0.04474100  |
| H | -3.15668200 | 2.76719300  | -0.21734100 |
| H | 3.28507000  | 0.80978300  | 0.51430200  |
| H | 0.02394600  | 4.11896000  | -0.67697500 |
| H | -0.19614200 | 4.07328700  | 1.06929500  |
| H | -1.56289500 | 4.49323200  | 0.02028800  |
| H | 2.42181000  | -2.69015900 | 0.18389300  |
| H | 3.69698200  | -1.53809300 | 0.35784600  |
| C | 6.16259100  | -0.79995900 | -0.98732100 |
| H | 5.42431600  | -0.44694000 | -1.70836700 |
| H | 6.54750400  | -1.76846300 | -1.32291600 |
| H | 6.98539300  | -0.07921500 | -0.94610400 |
| O | 5.50197700  | -0.90414500 | 0.26744600  |
| H | 6.13034200  | -1.21379100 | 0.92438800  |
| C | -4.03757700 | -3.13937600 | 0.51738200  |
| H | -4.29671000 | -4.19561200 | 0.41399500  |
| H | -2.94553900 | -3.06061100 | 0.59530800  |
| H | -4.47757600 | -2.77071400 | 1.45351600  |
| O | -4.53911000 | -2.45670300 | -0.61149700 |
| H | -4.28622500 | -1.51996500 | -0.53336500 |

### S6.2.8. F1-2MeOH-8

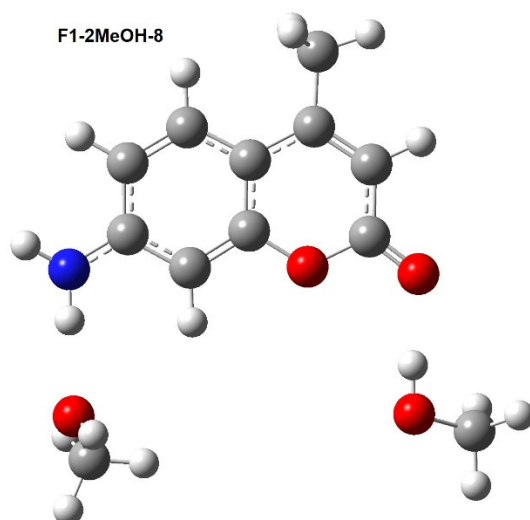

Fig.S16. The optimized complex configuration of F1-2MeOH-8

The coordinates of F1-2MeOH-8

|   |             |             |             |
|---|-------------|-------------|-------------|
| O | 0.97971300  | 0.27810900  | -0.11047800 |
| O | 3.09930500  | 0.86558300  | -0.19903500 |
| N | -3.65714100 | -0.62968000 | 0.08750800  |
| C | 0.29698600  | -2.02507700 | 0.03215600  |
| C | 1.67556500  | -2.41726700 | 0.01707400  |
| C | -0.01008100 | -0.65567200 | -0.03415600 |
| C | -0.79294900 | -2.91375000 | 0.10649900  |
| C | -1.30547300 | -0.17663900 | -0.02825800 |
| C | -2.37693900 | -1.07812900 | 0.04778600  |
| C | 2.63301500  | -1.44895000 | -0.06125800 |
| C | -2.09027900 | -2.46400700 | 0.11519600  |
| C | 2.05334500  | -3.86074100 | 0.08540400  |
| C | 2.30316500  | -0.05969500 | -0.12756700 |
| H | -0.60468500 | -3.98050700 | 0.15741100  |
| H | -1.48077400 | 0.89189500  | -0.08296900 |
| H | 3.68822200  | -1.69125400 | -0.07627400 |
| H | -2.91052800 | -3.17214400 | 0.17373100  |
| H | 1.62510200  | -4.41372100 | -0.75628900 |
| H | 1.66854000  | -4.31949500 | 1.00137500  |
| H | 3.13645200  | -3.98278800 | 0.06520100  |
| H | -3.85871400 | 0.34127900  | -0.13925300 |
| H | -4.40600500 | -1.29150100 | -0.02999600 |
| C | 3.56681500  | 4.22447600  | 0.34287200  |
| H | 3.37364100  | 5.29968800  | 0.33528000  |
| H | 4.48849500  | 4.03972800  | -0.22436600 |
| H | 3.73387400  | 3.91578600  | 1.38318100  |
| O | 2.45056100  | 3.57890000  | -0.23107700 |
| H | 2.62184400  | 2.62091300  | -0.22596000 |
| C | -4.02401400 | 3.20518600  | 0.44459700  |
| H | -4.64359800 | 4.07714900  | 0.21216100  |
| H | -4.35257000 | 2.78628900  | 1.39638400  |
| H | -2.97954500 | 3.51971500  | 0.53996200  |
| O | -4.17751100 | 2.18521400  | -0.53427200 |
| H | -3.89125200 | 2.52587800  | -1.38531400 |

### S6.2.9. F1-2MeOH-9

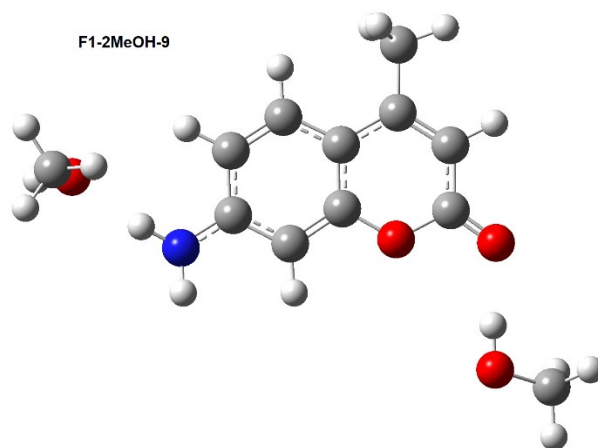

**Fig.S17. The optimized complex configuration of F1-2MeOH-9**

**The coordinates of F1-2MeOH-9**

|   |             |             |             |
|---|-------------|-------------|-------------|
| O | 1.62180100  | -0.30219800 | 0.03548200  |
| O | 3.74116700  | 0.24813100  | 0.26095600  |
| N | -2.83625100 | -1.81998400 | -0.48110300 |
| C | -0.12105900 | 1.35129200  | -0.10088900 |
| C | 0.86883700  | 2.38015700  | 0.02334100  |
| C | 0.30177700  | 0.01170300  | -0.09029600 |
| C | -1.50568900 | 1.57606400  | -0.23279200 |
| C | -0.57324200 | -1.05160700 | -0.20303900 |
| C | -1.94683300 | -0.80602500 | -0.33560400 |
| C | 2.17901400  | 2.02037600  | 0.14620900  |
| C | -2.39680700 | 0.53833200  | -0.34700200 |
| C | 0.47026800  | 3.81970800  | 0.01822900  |
| C | 2.59186600  | 0.65221800  | 0.15505500  |
| H | -1.87826100 | 2.59449800  | -0.24320900 |
| H | -0.18487400 | -2.06401100 | -0.18780300 |
| H | 2.96558000  | 2.75818900  | 0.24289900  |
| H | -3.45964700 | 0.73242700  | -0.44603200 |
| H | -0.22059000 | 4.03371800  | 0.83953300  |
| H | -0.04609300 | 4.07596100  | -0.91198000 |
| H | 1.34156500  | 4.46684700  | 0.12062000  |
| H | -2.53478500 | -2.76563000 | -0.31554800 |
| H | -3.83196400 | -1.62691800 | -0.40650200 |
| C | 5.88901800  | -2.41639500 | -0.07141700 |
| H | 6.24684400  | -3.44859000 | -0.06844500 |
| H | 6.48050400  | -1.84851300 | 0.65869900  |
| H | 6.07368500  | -1.99478200 | -1.06822600 |

|   |             |             |             |
|---|-------------|-------------|-------------|
| O | 4.51563300  | -2.43231100 | 0.25359200  |
| H | 4.19519600  | -1.51333500 | 0.25328000  |
| C | -6.32727300 | -1.07670000 | 0.98009000  |
| H | -5.60414200 | -0.80110300 | 1.74863500  |
| H | -6.70620100 | -2.08079300 | 1.19685300  |
| H | -7.15754000 | -0.36390200 | 1.00763800  |
| O | -5.64654200 | -1.03096900 | -0.26736200 |
| H | -6.26125400 | -1.27013800 | -0.96535300 |

### S6.2.10. F1-2MeOH-10

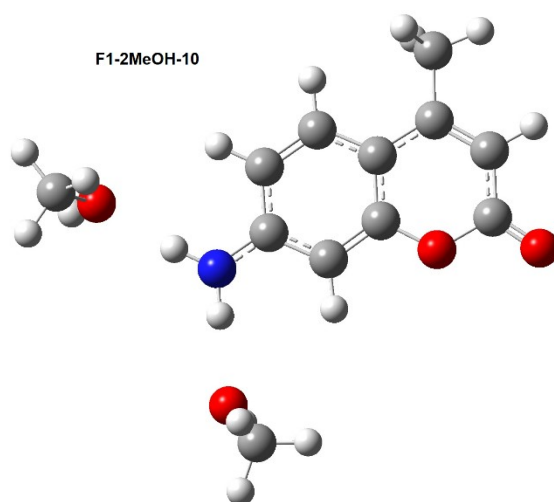

Fig.S18. The optimized complex configuration of F1-2MeOH-10

### The coordinates of F1-2MeOH-10

|   |             |             |             |
|---|-------------|-------------|-------------|
| O | 2.18394500  | 1.37431100  | -0.24025600 |
| O | 4.26261600  | 2.09387000  | -0.39399100 |
| N | -2.38121300 | 0.15901400  | 0.03993300  |
| C | 1.65960600  | -0.95018000 | 0.10360700  |
| C | 3.06118400  | -1.24806700 | 0.11359900  |
| C | 1.26080600  | 0.38589600  | -0.07734500 |
| C | 0.63123500  | -1.90052700 | 0.26216900  |
| C | -0.06468400 | 0.77376400  | -0.10091200 |
| C | -1.07662800 | -0.18771500 | 0.05864600  |
| C | 3.95233900  | -0.22951600 | -0.05295600 |
| C | -0.69369000 | -1.54247300 | 0.24178800  |
| C | 3.53467300  | -2.65281500 | 0.30403200  |
| C | 3.53771100  | 1.13011100  | -0.23809300 |
| H | 0.89240200  | -2.94376500 | 0.40435500  |
| H | -0.31188700 | 1.81993400  | -0.24371700 |
| H | 5.02110800  | -0.40505900 | -0.05282900 |

|   |             |             |             |
|---|-------------|-------------|-------------|
| H | -1.46851400 | -2.29188800 | 0.36624200  |
| H | 3.14102200  | -3.30577900 | -0.48106200 |
| H | 3.18587900  | -3.05397100 | 1.26067200  |
| H | 4.62353900  | -2.70460500 | 0.28356600  |
| H | -2.65517100 | 1.12671000  | -0.09735700 |
| H | -3.09815200 | -0.55093000 | 0.15143300  |
| C | -5.02729100 | -2.54264600 | -0.77430600 |
| H | -4.32233800 | -2.54657700 | -1.60655600 |
| H | -5.88294100 | -1.91360500 | -1.04117900 |
| H | -5.37291300 | -3.56716000 | -0.60268100 |
| O | -4.33332600 | -2.03277300 | 0.35668500  |
| H | -4.93369300 | -2.01603900 | 1.10603200  |
| C | -2.87025300 | 3.94145800  | 0.70467400  |
| H | -3.55041900 | 4.79710600  | 0.64287000  |
| H | -3.03171100 | 3.43491500  | 1.65695800  |
| H | -1.83619400 | 4.30009400  | 0.66812300  |
| O | -3.13419000 | 2.99349400  | -0.32119300 |
| H | -2.99392500 | 3.41256800  | -1.17378400 |

### S6.3. The complex configurations with an F1: MeOH molar ratio of 1:3

#### S6.3.1. F1-3MeOH-1

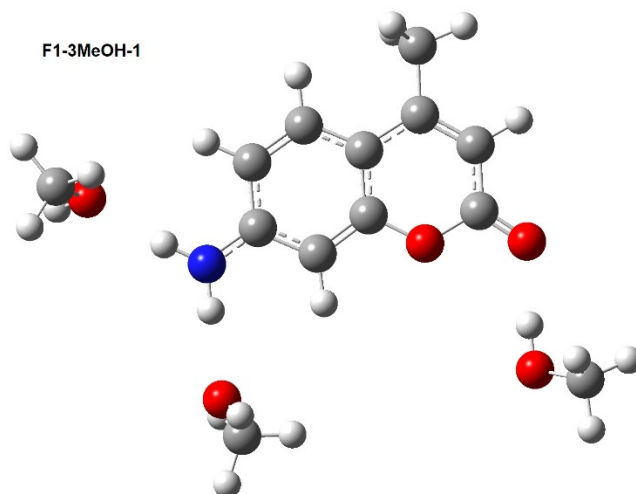

Fig.S19. The optimized complex configuration of F1-3MeOH-1

#### The coordinates of F1-3MeOH-1

|   |             |             |             |
|---|-------------|-------------|-------------|
| O | -1.85580000 | -0.02916300 | -0.07082600 |
| O | -4.04546500 | -0.25772000 | -0.05929900 |
| N | 2.80007300  | 0.81310800  | -0.07957500 |
| C | -0.37213200 | -1.92276000 | -0.15124300 |



|   |             |             |             |
|---|-------------|-------------|-------------|
| C | -1.50953500 | -2.79072600 | -0.17376600 |
| C | -0.58946800 | -0.53446800 | -0.09949900 |
| C | 0.97144000  | -2.34986400 | -0.17622600 |
| C | 0.43837300  | 0.38618300  | -0.07493800 |
| C | 1.77110900  | -0.05857500 | -0.10038500 |
| C | -2.75932400 | -2.24093900 | -0.14273300 |
| C | 2.01289200  | -1.45750900 | -0.15145200 |
| C | -1.33122500 | -4.27313200 | -0.23049300 |
| C | -2.96339300 | -0.82873300 | -0.08942500 |
| H | 1.18815000  | -3.41189600 | -0.21564100 |
| H | 0.20750200  | 1.44488000  | -0.03542600 |
| H | -3.65183300 | -2.85376800 | -0.15740800 |
| H | 3.03944800  | -1.80855900 | -0.17189800 |
| H | -0.75888900 | -4.62857100 | 0.63185900  |
| H | -0.77507900 | -4.56279500 | -1.12737800 |
| H | -2.29476400 | -4.78311600 | -0.24079300 |
| H | 2.62676400  | 1.81201600  | -0.02330800 |
| H | 3.75601600  | 0.47083900  | -0.07693500 |
| C | -5.56386100 | 2.64640900  | 0.95885700  |
| H | -5.78988600 | 3.71297800  | 1.02870100  |
| H | -5.35502500 | 2.27566600  | 1.97103800  |
| H | -6.45757500 | 2.13277200  | 0.58081900  |
| O | -4.45717600 | 2.49251300  | 0.09669400  |
| H | -4.25665200 | 1.54199000  | 0.03194600  |
| C | 6.18311400  | -0.52425000 | 1.19036100  |
| H | 5.43812800  | -0.80606600 | 1.93549000  |
| H | 6.65994300  | 0.40973400  | 1.50548500  |
| H | 6.93923000  | -1.31393900 | 1.13434500  |
| O | 5.49848900  | -0.37289200 | -0.04627400 |
| H | 6.13294800  | -0.12271400 | -0.72239400 |
| C | 1.73708000  | 4.40234500  | -1.08300000 |
| H | 1.96961200  | 5.47065600  | -1.02688500 |
| H | 2.23679800  | 3.98135100  | -1.95622100 |
| H | 0.65590200  | 4.27466300  | -1.20087000 |
| O | 2.22751600  | 3.70433000  | 0.05426000  |
| H | 1.79780700  | 4.05168700  | 0.83971700  |

### S6.3.2. F1-3MeOH-2

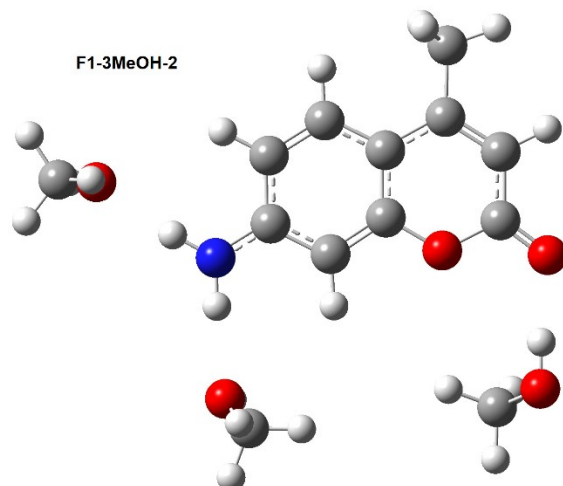

**Fig.S20. The optimized complex configuration of F1-3MeOH-2**

**The coordinates of F1-3MeOH-2**

|   |             |             |             |
|---|-------------|-------------|-------------|
| O | 1.98775400  | 0.01912700  | -0.19387000 |
| O | 4.18287200  | -0.10647400 | -0.28918400 |
| N | -2.69733800 | 0.64850900  | -0.01600600 |
| C | 0.60450300  | -1.92777700 | 0.10392400  |
| C | 1.78323900  | -2.73859000 | 0.13399400  |
| C | 0.75079900  | -0.53943500 | -0.06385000 |
| C | -0.71387000 | -2.41174800 | 0.23056800  |
| C | -0.32092300 | 0.32897500  | -0.10615300 |
| C | -1.62737200 | -0.17184500 | 0.02277300  |
| C | 3.00189200  | -2.13640400 | 0.00092600  |
| C | -1.79782900 | -1.57187300 | 0.19256700  |
| C | 1.68103900  | -4.21899100 | 0.30828100  |
| C | 3.13357000  | -0.72457100 | -0.16659100 |
| H | -0.87604400 | -3.47611300 | 0.36211300  |
| H | -0.14445600 | 1.39044600  | -0.23898900 |
| H | 3.92292900  | -2.70541800 | 0.01769400  |
| H | -2.80402600 | -1.96542600 | 0.29322800  |
| H | 1.09048800  | -4.66471800 | -0.49805900 |
| H | 1.17887700  | -4.46527100 | 1.24886200  |
| H | 2.66823500  | -4.68160500 | 0.31110300  |
| H | -2.57070900 | 1.65089600  | -0.11498300 |
| H | -3.63215200 | 0.27022300  | 0.10208100  |
| C | -6.21804000 | -0.79896100 | -0.76388600 |
| H | -5.61548900 | -0.99471100 | -1.65168300 |
| H | -6.80351200 | 0.11134900  | -0.92985500 |

|   |             |             |             |
|---|-------------|-------------|-------------|
| H | -6.89886300 | -1.64215900 | -0.60905800 |
| O | -5.31753100 | -0.65240300 | 0.32624200  |
| H | -5.82308100 | -0.47795600 | 1.12382500  |
| C | 3.53090800  | 3.28775900  | 0.36024700  |
| H | 3.60175500  | 4.36772700  | 0.21110200  |
| H | 2.47194500  | 3.00307100  | 0.30910100  |
| H | 3.90107700  | 3.05825500  | 1.36832400  |
| O | 4.29786900  | 2.65978900  | -0.64423800 |
| H | 4.22575200  | 1.69631400  | -0.52230200 |
| C | -1.54882300 | 4.28015000  | 0.74691400  |
| H | -1.81558300 | 5.34150100  | 0.71780300  |
| H | -1.87766400 | 3.86308800  | 1.69950300  |
| H | -0.46027100 | 4.18070600  | 0.67663200  |
| O | -2.21032600 | 3.55030800  | -0.27793900 |
| H | -1.93750000 | 3.89733500  | -1.13077000 |

### S6.3.3. F1-3MeOH-3

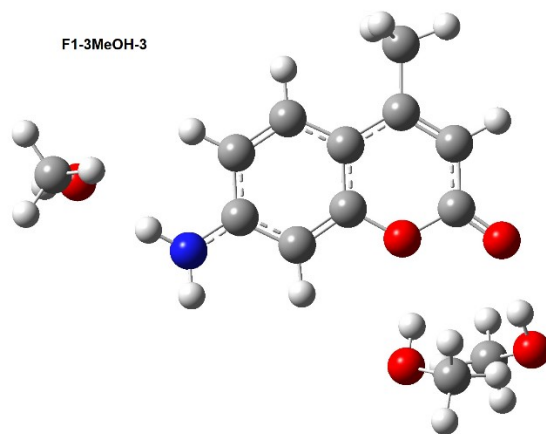

Fig.S21. The optimized complex configuration of F1-3MeOH-3

### The coordinates of F1-3MeOH-3

|   |             |             |             |
|---|-------------|-------------|-------------|
| O | -1.33477800 | 0.10602300  | -0.11309700 |
| O | -3.40962100 | 0.77609000  | -0.43098000 |
| N | 3.00557600  | -1.65467800 | 0.61927900  |
| C | 0.51034300  | 1.64773600  | -0.03397800 |
| C | -0.40542000 | 2.72680000  | -0.25466800 |
| C | 0.00447100  | 0.33910500  | 0.02999600  |
| C | 1.90306200  | 1.79300400  | 0.12515000  |
| C | 0.80330500  | -0.76796400 | 0.23569400  |
| C | 2.18738100  | -0.60036400 | 0.39208100  |
| C | -1.73456300 | 2.44763400  | -0.39164100 |

|   |             |             |             |
|---|-------------|-------------|-------------|
| C | 2.72193700  | 0.71175300  | 0.33213000  |
| C | 0.08756700  | 4.13453600  | -0.33141000 |
| C | -2.24228000 | 1.11605300  | -0.32122800 |
| H | 2.34022300  | 2.78449700  | 0.08187000  |
| H | 0.35272600  | -1.75380500 | 0.27317000  |
| H | -2.46601900 | 3.22833800  | -0.55816600 |
| H | 3.79200100  | 0.84524500  | 0.45097800  |
| H | 0.81464100  | 4.24691200  | -1.14144900 |
| H | 0.59265800  | 4.41927800  | 0.59666700  |
| H | -0.73538700 | 4.82792600  | -0.50514900 |
| H | 2.64826200  | -2.59130000 | 0.53675100  |
| H | 4.01456900  | -1.52765900 | 0.60931200  |
| C | -2.93002100 | -2.75043600 | -2.05286200 |
| H | -3.02625800 | -3.80391300 | -2.32213700 |
| H | -2.47160500 | -2.21964600 | -2.89621900 |
| H | -3.93422400 | -2.34362100 | -1.88471600 |
| O | -2.13081900 | -2.68218000 | -0.88626200 |
| H | -2.03282700 | -1.75555200 | -0.64095200 |
| C | 6.68777300  | -1.30932700 | -0.53171400 |
| H | 6.08670500  | -1.08355800 | -1.41327700 |
| H | 7.01154900  | -2.35389400 | -0.58409000 |
| H | 7.56768400  | -0.65827000 | -0.53051900 |
| O | 5.86624800  | -1.07137300 | 0.60424000  |
| H | 6.37133100  | -1.26306200 | 1.39825600  |
| C | -4.51585400 | -1.35462400 | 2.12955100  |
| H | -5.20534900 | -2.00926100 | 2.66711700  |
| H | -3.55719000 | -1.87916500 | 2.02624200  |
| H | -4.35598000 | -0.45424700 | 2.73684400  |
| O | -5.09426800 | -1.05454100 | 0.87648000  |
| H | -4.48684400 | -0.46809200 | 0.39886000  |

#### S6.3.4. F1-3MeOH-4

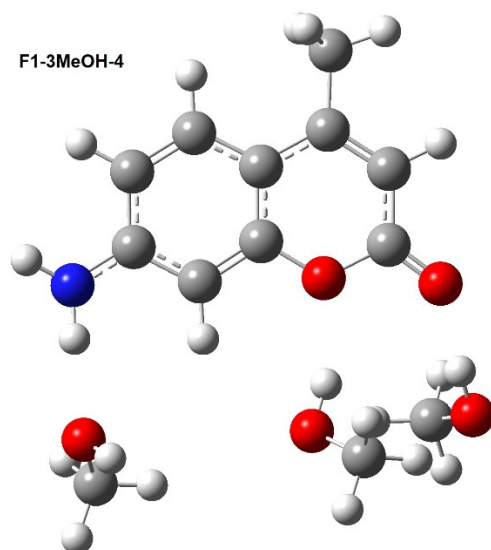

**Fig.S22. The optimized complex configuration of F1-3MeOH-4**

**The coordinates of F1-3MeOH-4**

|   |             |             |             |
|---|-------------|-------------|-------------|
| O | 0.88306300  | -0.30470300 | 0.14147800  |
| O | 2.59929300  | -1.67653600 | 0.31210400  |
| N | -3.01311400 | 2.34898100  | -0.25277500 |
| C | 1.16314200  | 2.08053800  | -0.01162700 |
| C | 2.58216800  | 1.90120900  | 0.07055500  |
| C | 0.33841000  | 0.94415800  | 0.02873100  |
| C | 0.51371800  | 3.32516300  | -0.12908500 |
| C | -1.03829000 | 1.01008100  | -0.03848000 |
| C | -1.66481000 | 2.26004100  | -0.15679400 |
| C | 3.08182200  | 0.63584200  | 0.18067100  |
| C | -0.85375500 | 3.42107600  | -0.20115800 |
| C | 3.49799800  | 3.08047800  | 0.03496900  |
| C | 2.23755300  | -0.51464500 | 0.21663300  |
| H | 1.10790100  | 4.23166100  | -0.16383000 |
| H | -1.62383000 | 0.09866800  | 0.00522700  |
| H | 4.14611500  | 0.44763000  | 0.24368200  |
| H | -1.32700000 | 4.39326700  | -0.29327200 |
| H | 3.28221700  | 3.76348700  | 0.86232000  |
| H | 3.36588300  | 3.64605500  | -0.89246200 |
| H | 4.54019600  | 2.76886800  | 0.10575600  |
| H | -3.59200100 | 1.53094400  | -0.07852800 |
| H | -3.45094000 | 3.25222400  | -0.19015600 |
| C | -0.67284500 | -3.22838200 | 2.13330200  |
| H | -1.53960700 | -3.82381800 | 2.42622100  |

|   |             |             |             |
|---|-------------|-------------|-------------|
| H | -0.34275600 | -2.64899300 | 3.00424600  |
| H | 0.13243200  | -3.90994900 | 1.83584500  |
| O | -1.07498100 | -2.39212700 | 1.06318500  |
| H | -0.31467900 | -1.86890700 | 0.78693300  |
| C | 1.21861100  | -3.93129400 | -1.97579900 |
| H | 0.94548100  | -4.89950600 | -2.40118900 |
| H | 0.31510100  | -3.30914200 | -1.93522100 |
| H | 1.93979400  | -3.45274100 | -2.65108300 |
| O | 1.76269500  | -4.16110600 | -0.69309100 |
| H | 2.00486200  | -3.30197100 | -0.31287600 |
| C | -4.77236600 | -1.01310700 | -0.86292300 |
| H | -5.67234100 | -1.61651600 | -0.70742800 |
| H | -4.89108900 | -0.43821300 | -1.78204700 |
| H | -3.90769100 | -1.67621800 | -0.97058500 |
| O | -4.58773400 | -0.07779300 | 0.19232900  |
| H | -4.47306900 | -0.55851800 | 1.01585100  |

### S6.3.5. F1-3MeOH-5

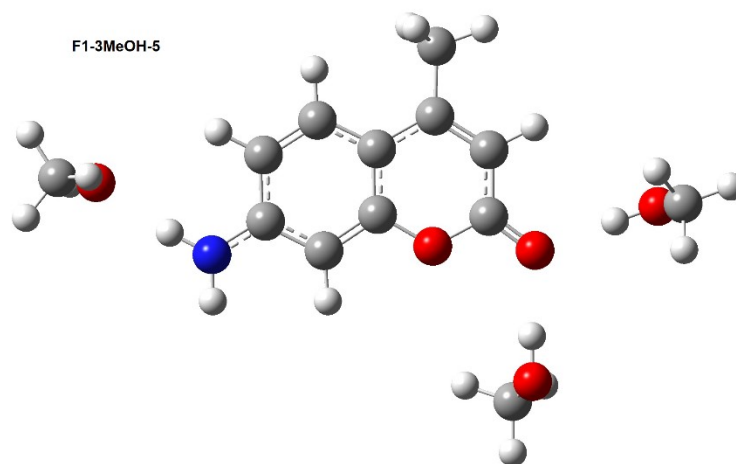

Fig.S23. The optimized complex configuration of F1-3MeOH-5

### The coordinates of F1-3MeOH-5

|   |             |             |             |
|---|-------------|-------------|-------------|
| O | 0.90672800  | -0.63031700 | 0.03348600  |
| O | 3.08879600  | -0.39926200 | 0.00882400  |
| N | -3.74855600 | -1.49054900 | 0.14772900  |
| C | -0.58970400 | 1.24052800  | -0.18734800 |
| C | 0.54142000  | 2.11067400  | -0.28467600 |
| C | -0.36317200 | -0.13690200 | -0.02629700 |
| C | -1.93591300 | 1.65641600  | -0.24076900 |

|   |             |             |             |
|---|-------------|-------------|-------------|
| C | -1.38391300 | -1.06055900 | 0.07904300  |
| C | -2.71603200 | -0.62505600 | 0.02575500  |
| C | 1.79508800  | 1.57035300  | -0.21791100 |
| C | -2.96998300 | 0.76152100  | -0.13881200 |
| C | 0.35508800  | 3.58243600  | -0.45523700 |
| C | 1.99943300  | 0.17040500  | -0.05748400 |
| H | -2.16029000 | 2.70991200  | -0.36626600 |
| H | -1.14176000 | -2.11038300 | 0.20209100  |
| H | 2.68435400  | 2.18429500  | -0.28681200 |
| H | -3.99932500 | 1.10118100  | -0.18437800 |
| H | -0.20969800 | 4.00064900  | 0.38355900  |
| H | -0.21302300 | 3.79770800  | -1.36534700 |
| H | 1.31545400  | 4.09448600  | -0.51650900 |
| H | -3.57386200 | -2.48094100 | 0.15806200  |
| H | -4.70246700 | -1.17477700 | -0.00923200 |
| C | -7.33006800 | -0.24641700 | 0.80704300  |
| H | -6.74662200 | -0.00725600 | 1.69688800  |
| H | -7.87720000 | -1.17802900 | 0.98430600  |
| H | -8.04437100 | 0.56324700  | 0.62731400  |
| O | -6.41140800 | -0.37485600 | -0.27074400 |
| H | -6.89867900 | -0.58640600 | -1.07076900 |
| C | 3.19144100  | -3.80031400 | -0.79595600 |
| H | 3.35162200  | -4.87035800 | -0.64572700 |
| H | 2.15774300  | -3.65462600 | -1.13605200 |
| H | 3.86808600  | -3.46235500 | -1.59170800 |
| O | 3.44423500  | -3.14775200 | 0.43008800  |
| H | 3.28734000  | -2.19719100 | 0.30076700  |
| C | 5.97605200  | 1.20882400  | 1.10166200  |
| H | 6.94145900  | 1.71546200  | 1.03560200  |
| H | 5.27208100  | 1.88109700  | 1.60949400  |
| H | 6.10336300  | 0.31035700  | 1.71922400  |
| O | 5.56016500  | 0.89674900  | -0.21143100 |
| H | 4.69912800  | 0.44981700  | -0.15446600 |

### S6.3.6. F1-3MeOH-6

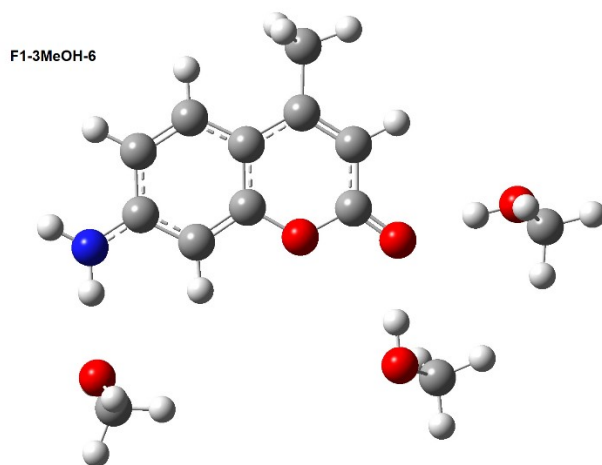

**Fig.S24. The optimized complex configuration of F1-3MeOH-6**

**The coordinates of F1-3MeOH-6**

|   |             |             |             |
|---|-------------|-------------|-------------|
| O | 0.26731400  | 0.12261400  | -0.02865600 |
| O | 2.43458800  | 0.45224400  | 0.06034600  |
| N | -4.44163700 | -0.20578100 | -0.24620300 |
| C | -0.70817700 | -2.07320800 | 0.09657700  |
| C | 0.60443400  | -2.63028700 | 0.21033800  |
| C | -0.83622500 | -0.67854400 | -0.02295100 |
| C | -1.90437900 | -2.81868800 | 0.09283900  |
| C | -2.05486300 | -0.04184600 | -0.14032600 |
| C | -3.23416000 | -0.80270200 | -0.14156800 |
| C | 1.68024100  | -1.78741300 | 0.19871600  |
| C | -3.12945900 | -2.21235200 | -0.02155800 |
| C | 0.79465200  | -4.10580700 | 0.33865600  |
| C | 1.52536000  | -0.37690200 | 0.07850400  |
| H | -1.85660000 | -3.89829600 | 0.18255900  |
| H | -2.08892800 | 1.03793700  | -0.23031600 |
| H | 2.69445700  | -2.15726000 | 0.28189200  |
| H | -4.03492800 | -2.81032100 | -0.02123300 |
| H | 0.37311200  | -4.62690300 | -0.52633500 |
| H | 0.28020600  | -4.48647800 | 1.22629100  |
| H | 1.85204900  | -4.35936700 | 0.41498700  |
| H | -4.52133600 | 0.79881300  | -0.38063700 |
| H | -5.27622100 | -0.76441300 | -0.29448400 |
| C | 3.00550100  | 3.76816300  | 0.79882200  |
| H | 2.98720300  | 4.85632600  | 0.70524300  |
| H | 2.65430500  | 3.50609500  | 1.80537800  |
| H | 4.04650000  | 3.43426300  | 0.69806400  |



|   |             |             |             |
|---|-------------|-------------|-------------|
| O | 2.17552700  | 3.23252100  | -0.21024900 |
| H | 2.19844200  | 2.26409200  | -0.13292500 |
| C | -4.28053500 | 3.58325500  | 0.46356700  |
| H | -4.78522900 | 4.54616700  | 0.33624000  |
| H | -4.63415500 | 3.12218500  | 1.38643400  |
| H | -3.20121900 | 3.74941800  | 0.54361400  |
| O | -4.59655000 | 2.68928500  | -0.59623400 |
| H | -4.29533000 | 3.07044400  | -1.42465800 |
| C | 5.71824600  | 0.33919700  | -1.03462000 |
| H | 6.79915200  | 0.18615800  | -0.99889300 |
| H | 5.31299900  | -0.27545200 | -1.84889500 |
| H | 5.53036500  | 1.39461300  | -1.27117000 |
| O | 5.18748200  | -0.02592600 | 0.22219000  |
| H | 4.22592100  | 0.10934300  | 0.19111700  |

### S6.3.7. F1-3MeOH-7

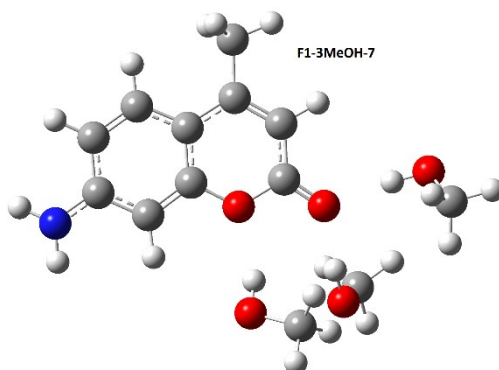

Fig.S25. The optimized complex configuration of F1-3MeOH-7

### The coordinates of F1-3MeOH-7

|   |             |             |            |
|---|-------------|-------------|------------|
| O | 0.25096300  | -0.34354500 | 0.09100400 |
| O | -1.82302500 | 0.37202600  | 0.09865800 |
| N | 4.58951600  | -2.24464100 | 0.05299100 |
| C | 2.13238700  | 1.15271800  | 0.03868200 |
| C | 1.22623400  | 2.26209400  | 0.01830300 |
| C | 1.60281800  | -0.14656200 | 0.07480200 |
| C | 3.53656700  | 1.26105600  | 0.02592600 |
| C | 2.38910200  | -1.28142000 | 0.09614600 |
| C | 3.78272000  | -1.14856900 | 0.07908000 |
| C | -0.11696000 | 2.01542300  | 0.03797400 |
| C | 4.34296000  | 0.15060700  | 0.04485400 |

|   |             |             |             |
|---|-------------|-------------|-------------|
| C | 1.74259000  | 3.66189600  | -0.02182500 |
| C | -0.63703200 | 0.69118300  | 0.07828700  |
| H | 3.99257900  | 2.24434000  | 0.00142900  |
| H | 1.91956200  | -2.25841900 | 0.12471900  |
| H | -0.84311200 | 2.81837300  | 0.02642600  |
| H | 5.42219200  | 0.26165200  | 0.03279400  |
| H | 2.35794700  | 3.82098100  | -0.91260400 |
| H | 2.37494900  | 3.86563300  | 0.84771900  |
| H | 0.92373200  | 4.38111100  | -0.03207600 |
| H | 4.20116400  | -3.14478700 | 0.28234100  |
| H | 5.56829700  | -2.13053200 | 0.25922300  |
| C | -2.03084300 | -2.89412400 | -1.81323600 |
| H | -2.17011600 | -3.86124300 | -2.29987100 |
| H | -2.05963900 | -2.11354600 | -2.58309600 |
| H | -2.86084000 | -2.73378100 | -1.11549700 |
| O | -0.78149900 | -2.93388000 | -1.14643100 |
| H | -0.63878800 | -2.08463200 | -0.71656200 |
| C | -3.52659600 | -1.11582300 | 2.73374700  |
| H | -4.09123200 | -1.86306500 | 3.29538800  |
| H | -2.63951100 | -0.84510600 | 3.32057700  |
| H | -4.15552300 | -0.22335300 | 2.62238500  |
| O | -3.18490700 | -1.68342900 | 1.48543700  |
| H | -2.68213900 | -1.02326800 | 0.98479600  |
| C | -4.75488300 | 1.38832800  | -1.43849400 |
| H | -5.64413100 | 1.98525900  | -1.65241700 |
| H | -4.15548400 | 1.32699900  | -2.35597700 |
| H | -5.07962600 | 0.37533600  | -1.16806900 |
| O | -4.05376200 | 2.01930700  | -0.38651400 |
| H | -3.26345300 | 1.48986200  | -0.19526200 |

#### S6.4. The complex configurations with an F1: MeOH molar ratio of 1:4

##### S6.4.1. F1-4MeOH-1

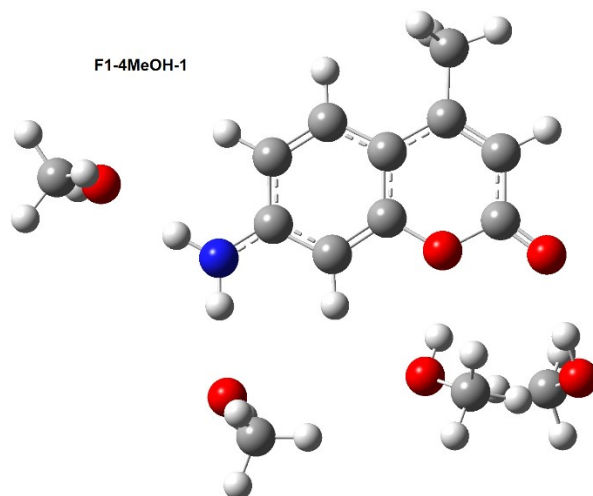

**Fig.S26. The optimized complex configuration of F1-4MeOH-1**

**The coordinates of F1-4MeOH-1**

|   |             |             |             |
|---|-------------|-------------|-------------|
| O | 1.57191200  | 0.46824100  | 0.12011600  |
| O | 3.72632500  | 0.90712700  | 0.27060600  |
| N | -2.97080900 | -0.81829200 | -0.22238800 |
| C | -0.07909700 | 2.20868600  | -0.07476700 |
| C | 0.96739400  | 3.18198000  | -0.01734400 |
| C | 0.26324400  | 0.84722800  | -0.00266300 |
| C | -1.45220200 | 2.50548900  | -0.19928500 |
| C | -0.66905900 | -0.16775700 | -0.04759600 |
| C | -2.03329600 | 0.14864800  | -0.17202700 |
| C | 2.26100500  | 2.75782200  | 0.10047200  |
| C | -2.40283100 | 1.51817900  | -0.24719100 |
| C | 0.65072600  | 4.64021700  | -0.08841600 |
| C | 2.60224700  | 1.37526400  | 0.16863500  |
| H | -1.76554400 | 3.54214100  | -0.25874600 |
| H | -0.34589100 | -1.20072300 | 0.01669300  |
| H | 3.08715100  | 3.45622700  | 0.14460200  |
| H | -3.45395700 | 1.76967800  | -0.34322900 |
| H | -0.01489600 | 4.93288400  | 0.72934000  |
| H | 0.13615700  | 4.87986900  | -1.02401000 |
| H | 1.55832300  | 5.24103100  | -0.02845800 |
| H | -2.70278600 | -1.79488400 | -0.14686200 |
| H | -3.95353900 | -0.57149000 | -0.29170800 |
| C | 2.99651700  | -2.33708700 | 2.33811100  |
| H | 2.92882700  | -3.33025500 | 2.78624400  |
| H | 2.91739100  | -1.59190400 | 3.13917100  |

|   |             |             |             |
|---|-------------|-------------|-------------|
| H | 3.97602800  | -2.23804000 | 1.85655400  |
| O | 1.93909900  | -2.22181100 | 1.40264900  |
| H | 1.99269600  | -1.35280800 | 0.98999100  |
| C | -6.63158300 | -0.02576300 | 0.72739400  |
| H | -6.03242400 | 0.16536600  | 1.61847100  |
| H | -7.06061800 | -1.03047200 | 0.80080200  |
| H | -7.44125200 | 0.70979800  | 0.68459000  |
| O | -5.76289900 | 0.09340600  | -0.39163700 |
| H | -6.26489400 | -0.07620500 | -1.19254400 |
| C | 4.31473200  | -1.75933200 | -1.92124000 |
| H | 4.83068500  | -2.62806300 | -2.33615300 |
| H | 3.26126400  | -2.02856000 | -1.76960600 |
| H | 4.36277400  | -0.94870900 | -2.66000600 |
| O | 4.95417900  | -1.41431800 | -0.71044900 |
| H | 4.49935500  | -0.64028600 | -0.34088400 |
| C | -1.34704700 | -4.24621800 | -1.06430800 |
| H | -1.46159900 | -5.33456600 | -1.03418000 |
| H | -1.76184700 | -3.87697700 | -2.00299400 |
| H | -0.28167500 | -3.99531600 | -1.02712200 |
| O | -2.07109600 | -3.61931700 | -0.01369600 |
| H | -1.71872100 | -3.92044400 | 0.82740100  |

#### S6.4.2. F1-4MeOH-2

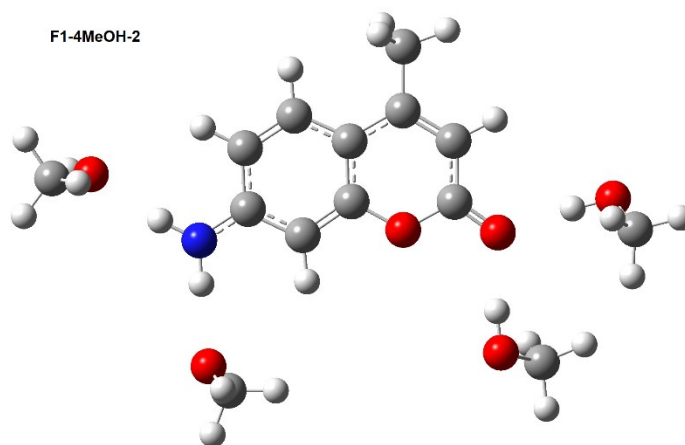

Fig.S27. The optimized complex configuration of F1-4MeOH-2

#### The coordinates of F1-4MeOH-2

|   |             |            |            |
|---|-------------|------------|------------|
| O | -1.10878300 | 0.16349800 | 0.00760300 |
| O | -3.30229400 | 0.12065400 | 0.00689700 |

|   |             |             |             |
|---|-------------|-------------|-------------|
| N | 3.59807800  | 0.63279800  | 0.05247200  |
| C | 0.22108400  | -1.82798400 | -0.23025900 |
| C | -0.97963900 | -2.59671900 | -0.31730100 |
| C | 0.11519200  | -0.43511500 | -0.06592200 |
| C | 1.52765900  | -2.35677500 | -0.29546100 |
| C | 1.21036400  | 0.39776000  | 0.02948000  |
| C | 2.50382000  | -0.14798600 | -0.03751300 |
| C | -2.18384700 | -1.95205900 | -0.23768100 |
| C | 2.63465700  | -1.55385500 | -0.20324400 |
| C | -0.92273200 | -4.07897100 | -0.49223300 |
| C | -2.26666200 | -0.54145900 | -0.07281200 |
| H | 1.65981200  | -3.42584800 | -0.42156000 |
| H | 1.06340500  | 1.46456300  | 0.15512300  |
| H | -3.12182600 | -2.48952800 | -0.29817300 |
| H | 3.63114100  | -1.98005600 | -0.25583400 |
| H | -0.38397900 | -4.54659400 | 0.33749200  |
| H | -0.38876600 | -4.34019200 | -1.41095800 |
| H | -1.92449600 | -4.50616800 | -0.54003700 |
| H | 3.50543500  | 1.63689700  | 0.17418500  |
| H | 4.52337000  | 0.21744000  | -0.00045800 |
| C | 7.03759400  | -0.91237500 | 1.00040600  |
| H | 6.40391100  | -1.04930900 | 1.87744900  |
| H | 7.65212800  | -0.01799400 | 1.14655600  |
| H | 7.69008500  | -1.78553500 | 0.89914200  |
| O | 6.17352500  | -0.77794200 | -0.12044700 |
| H | 6.70700700  | -0.65471700 | -0.90937100 |
| C | -4.42650100 | 3.31340500  | -0.62095300 |
| H | -4.57911100 | 4.38788600  | -0.49657300 |
| H | -4.06658900 | 3.13585200  | -1.64280600 |
| H | -5.39801700 | 2.81513200  | -0.50546800 |
| O | -3.49409600 | 2.89245300  | 0.35209400  |
| H | -3.36191000 | 1.93524000  | 0.24505700  |
| C | 2.79928800  | 4.35561800  | -0.68275200 |
| H | 3.12383600  | 5.39388200  | -0.55978400 |
| H | 3.23815200  | 3.95844400  | -1.59878200 |
| H | 1.70843200  | 4.32743300  | -0.77422500 |
| O | 3.25779600  | 3.53893900  | 0.38680900  |
| H | 2.88364400  | 3.86575100  | 1.20867800  |
| C | -6.50693400 | -0.39722700 | 1.18528200  |
| H | -7.54924000 | -0.72372300 | 1.19629400  |

|   |             |             |             |
|---|-------------|-------------|-------------|
| H | -5.99949000 | -0.84560200 | 2.04930700  |
| H | -6.48981200 | 0.69425400  | 1.30229600  |
| O | -5.93677100 | -0.80932200 | -0.03922400 |
| H | -5.00874300 | -0.52087000 | -0.04892500 |

### S6.4.3. F1-4MeOH-3

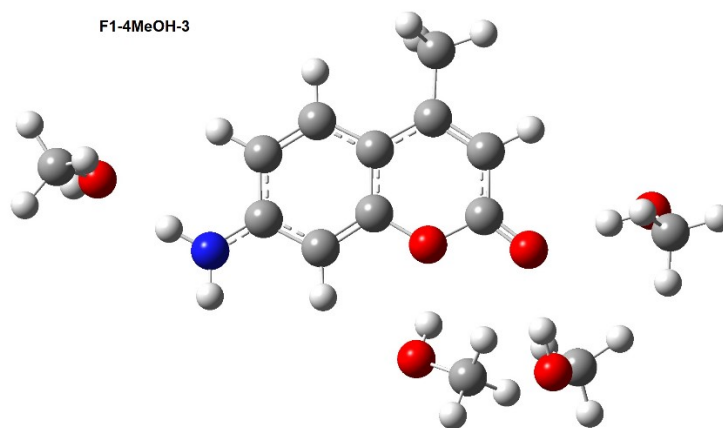

Fig.S28. The optimized complex configuration of F1-4MeOH-3

### The coordinates of F1-4MeOH-3

|   |             |             |             |
|---|-------------|-------------|-------------|
| O | -0.61105300 | -0.23747200 | 0.10878200  |
| O | -2.76675900 | 0.16212600  | 0.00739400  |
| N | 3.95716600  | -1.46060600 | 0.38699600  |
| C | 1.02976400  | 1.52121000  | 0.11906200  |
| C | -0.02614000 | 2.48071800  | 0.03106100  |
| C | 0.69749300  | 0.15654100  | 0.15670800  |
| C | 2.40371300  | 1.83549900  | 0.17192700  |
| C | 1.63860400  | -0.84848500 | 0.24009500  |
| C | 3.00045100  | -0.51272000 | 0.29273000  |
| C | -1.32008400 | 2.03878700  | -0.00826600 |
| C | 3.36254600  | 0.85946800  | 0.25614600  |
| C | 0.27779900  | 3.94179600  | -0.01494700 |
| C | -1.64016300 | 0.65471000  | 0.03495600  |
| H | 2.71051000  | 2.87526000  | 0.14559500  |
| H | 1.31766500  | -1.88410900 | 0.26431600  |
| H | -2.15438400 | 2.72604700  | -0.07096000 |
| H | 4.41442400  | 1.12201200  | 0.29603100  |
| H | 0.90946500  | 4.17823700  | -0.87659800 |
| H | 0.82502100  | 4.25143500  | 0.88060900  |

|   |             |             |             |
|---|-------------|-------------|-------------|
| H | -0.63710900 | 4.53016300  | -0.08326900 |
| H | 3.71033500  | -2.43497000 | 0.36262900  |
| H | 4.94221200  | -1.20766400 | 0.37133800  |
| C | -2.34514200 | -3.19655100 | -1.78329500 |
| H | -2.28497600 | -4.17991400 | -2.25344000 |
| H | -2.54446700 | -2.45305800 | -2.56464400 |
| H | -3.18151900 | -3.19947800 | -1.07515100 |
| O | -1.10713300 | -2.96307300 | -1.13481300 |
| H | -1.14210500 | -2.09836300 | -0.71314400 |
| C | 7.54034600  | -0.67644700 | -0.81260700 |
| H | 6.90193000  | -0.53795900 | -1.68587200 |
| H | 7.99103800  | -1.67305500 | -0.85986600 |
| H | 8.33186800  | 0.07928200  | -0.83268500 |
| O | 6.71345800  | -0.52904000 | 0.33496900  |
| H | 7.25040700  | -0.64845800 | 1.12220300  |
| C | -4.21127800 | -1.63774900 | 2.60124500  |
| H | -4.67074300 | -2.47424300 | 3.13219500  |
| H | -3.34832400 | -1.29422000 | 3.18606200  |
| H | -4.94312100 | -0.82151200 | 2.54928300  |
| O | -3.83527400 | -2.09616700 | 1.31857200  |
| H | -3.42625500 | -1.35562500 | 0.84467800  |
| C | -5.78165800 | 1.00853900  | -1.50715600 |
| H | -6.72922400 | 1.52724000  | -1.66843700 |
| H | -5.16706100 | 1.13173300  | -2.40826200 |
| H | -5.99485500 | -0.06020900 | -1.37629300 |
| O | -5.16966200 | 1.57140200  | -0.36508500 |
| H | -4.32701300 | 1.11156500  | -0.21979400 |

#### S6.4.4. F1-4MeOH-4

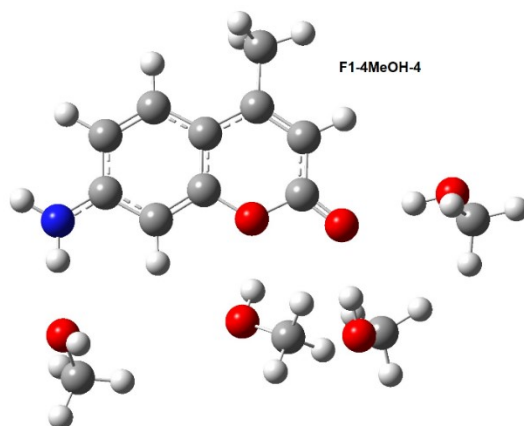

Fig.S29. The optimized complex configuration of F1-4MeOH-4

### The coordinates of F1-4MeOH-4

|   |             |             |             |
|---|-------------|-------------|-------------|
| O | -0.17559000 | 0.18237500  | 0.02023700  |
| O | -2.35847500 | -0.04511700 | 0.04383600  |
| N | 4.55087600  | 0.28188300  | -0.00445500 |
| C | 0.89945800  | 2.33414600  | 0.06615300  |
| C | -0.38829200 | 2.95549400  | 0.09153300  |
| C | 0.96873900  | 0.93113900  | 0.02976000  |
| C | 2.12906700  | 3.02374600  | 0.07169500  |
| C | 2.15777900  | 0.23385400  | -0.00108600 |
| C | 3.37070700  | 0.94056200  | 0.00542900  |
| C | -1.50393700 | 2.16457200  | 0.08404200  |
| C | 3.32776200  | 2.35771200  | 0.04337600  |
| C | -0.51318100 | 4.44283500  | 0.12809200  |
| C | -1.41722200 | 0.74577100  | 0.05108900  |
| H | 2.12894600  | 4.10774800  | 0.09903300  |
| H | 2.14860200  | -0.84972800 | -0.03258500 |
| H | -2.50068400 | 2.58680400  | 0.10533000  |
| H | 4.25953200  | 2.91387900  | 0.04916200  |
| H | -0.03191600 | 4.89271100  | -0.74561400 |
| H | -0.01830000 | 4.85081000  | 1.01465600  |
| H | -1.55944200 | 4.74786600  | 0.14344400  |
| H | 4.57804500  | -0.72571800 | -0.14166600 |
| H | 5.40766800  | 0.79832100  | -0.10704300 |
| C | -0.98906200 | -3.10606100 | -1.91151000 |
| H | -0.65910500 | -4.03286700 | -2.38457000 |
| H | -1.35050500 | -2.42917200 | -2.69522400 |
| H | -1.81791400 | -3.33751300 | -1.23289400 |
| O | 0.12317900  | -2.56655500 | -1.21894100 |
| H | -0.15179500 | -1.74778800 | -0.79348900 |
| C | -3.22676400 | -2.30736400 | 2.52747400  |
| H | -3.40790000 | -3.26481500 | 3.02062200  |
| H | -2.53578600 | -1.72648400 | 3.15177900  |
| H | -4.17998600 | -1.76660000 | 2.46835100  |
| O | -2.68897800 | -2.57660700 | 1.24874300  |
| H | -2.52402700 | -1.72830600 | 0.80911700  |
| C | 4.18972300  | -3.48550300 | 0.72415200  |
| H | 4.63464000  | -4.47504300 | 0.57915700  |
| H | 4.61110700  | -3.04104600 | 1.62649600  |
| H | 3.10789100  | -3.59195600 | 0.85520500  |
| O | 4.50391800  | -2.61413600 | -0.35509000 |



|   |             |             |             |
|---|-------------|-------------|-------------|
| H | 4.13478500  | -2.97612200 | -1.16451100 |
| C | -5.57081500 | -0.23396000 | -1.25297800 |
| H | -6.63724200 | -0.02930600 | -1.37035400 |
| H | -5.07630800 | -0.03060300 | -2.21161300 |
| H | -5.45062800 | -1.29987600 | -1.02016200 |
| O | -5.08324400 | 0.59370700  | -0.21703100 |
| H | -4.13607300 | 0.41061800  | -0.10879900 |

#### S6.4.5. F1-4MeOH-5

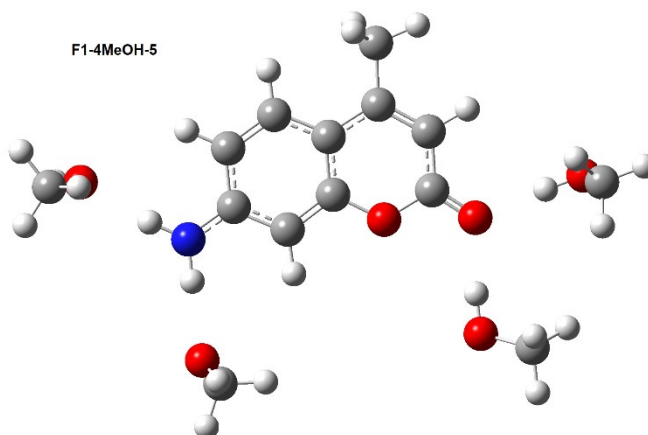

Fig.S30. The optimized complex configuration of F1-4MeOH-5

#### The coordinates of F1-4MeOH-5

|   |             |             |             |
|---|-------------|-------------|-------------|
| O | -1.09559800 | 0.24250700  | -0.15220300 |
| O | -3.28875700 | 0.26251300  | -0.20079700 |
| N | 3.62105600  | 0.57878500  | -0.02053700 |
| C | 0.17866300  | -1.79743200 | -0.22931500 |
| C | -1.04236100 | -2.53548400 | -0.29780300 |
| C | 0.11123200  | -0.39438100 | -0.15706000 |
| C | 1.46976600  | -2.36660300 | -0.22682300 |
| C | 1.22852200  | 0.41118300  | -0.08759600 |
| C | 2.50613300  | -0.17466400 | -0.08607700 |
| C | -2.22806800 | -1.85286400 | -0.28895700 |
| C | 2.59805900  | -1.59150900 | -0.15725600 |
| C | -1.02608300 | -4.02690700 | -0.37761300 |
| C | -2.27194900 | -0.43288400 | -0.21458000 |
| H | 1.57252900  | -3.44494500 | -0.28064900 |
| H | 1.11085900  | 1.48766600  | -0.03434100 |
| H | -3.18028500 | -2.36581200 | -0.33920100 |

|   |             |             |             |
|---|-------------|-------------|-------------|
| H | 3.58186000  | -2.04921700 | -0.15652300 |
| H | -0.52213100 | -4.45599000 | 0.49378100  |
| H | -0.47806500 | -4.36128800 | -1.26375800 |
| H | -2.03882600 | -4.42751600 | -0.42473900 |
| H | 3.55591000  | 1.59032200  | 0.04471300  |
| H | 4.53412700  | 0.13431300  | -0.00267400 |
| C | -4.59472500 | 3.32868200  | 0.62780000  |
| H | -4.68978600 | 4.41286900  | 0.72170400  |
| H | -4.68425900 | 2.89034300  | 1.63047800  |
| H | -5.43019900 | 2.96461600  | 0.01567400  |
| O | -3.34269400 | 3.05290600  | 0.03638500  |
| H | -3.26068100 | 2.08845600  | -0.05513800 |
| C | 6.88398100  | -1.00178000 | 1.28750700  |
| H | 6.14629300  | -1.10403400 | 2.08432600  |
| H | 7.48693400  | -0.10805500 | 1.47883900  |
| H | 7.53319200  | -1.88317500 | 1.29523600  |
| O | 6.16496800  | -0.89794600 | 0.06547200  |
| H | 6.79228800  | -0.80474900 | -0.65567200 |
| C | 2.99196300  | 4.27293900  | -0.99790500 |
| H | 3.35405100  | 5.30355000  | -0.92593100 |
| H | 3.44927200  | 3.80185500  | -1.86876900 |
| H | 1.90526900  | 4.28116600  | -1.13238300 |
| O | 3.37455000  | 3.50840800  | 0.13802700  |
| H | 2.97886200  | 3.89821000  | 0.92143400  |
| C | -6.40084900 | -0.71663100 | 0.97637200  |
| H | -7.43248600 | -1.07433300 | 0.94664900  |
| H | -5.82006900 | -1.40234000 | 1.60711800  |
| H | -6.39669700 | 0.27478400  | 1.44793300  |
| O | -5.91797200 | -0.67612000 | -0.34999000 |
| H | -4.99703700 | -0.36633000 | -0.32367400 |

## S6.5. The complex configurations with an F1: MeOH molar ratio of 1:5

### S6.5.1. F1-5MeOH-1

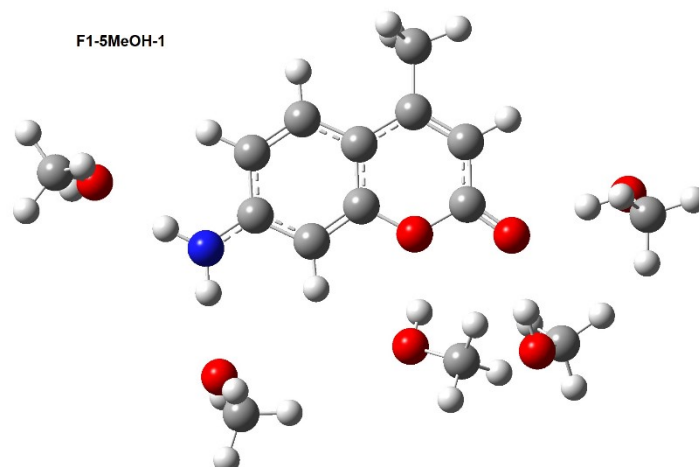

**Fig.S31. The optimized complex configuration of F1-5MeOH-1**

**The coordinates of F1-5MeOH-1**

|   |             |             |             |
|---|-------------|-------------|-------------|
| O | 0.90392500  | -0.09415300 | 0.04515900  |
| O | 3.09540300  | -0.21923000 | 0.03165300  |
| N | -3.78358100 | 0.55640300  | 0.07924900  |
| C | -0.50146300 | -2.04071400 | 0.20453500  |
| C | 0.66853200  | -2.85805300 | 0.24102900  |
| C | -0.34652500 | -0.64656800 | 0.10592300  |
| C | -1.82692000 | -2.52240000 | 0.26004300  |
| C | -1.40791900 | 0.23119200  | 0.06343500  |
| C | -2.72097600 | -0.26913500 | 0.11900700  |
| C | 1.89832500  | -2.25891700 | 0.18298600  |
| C | -2.90333900 | -1.67541300 | 0.21953700  |
| C | 0.55507800  | -4.34362900 | 0.34440100  |
| C | 2.03951000  | -0.84902600 | 0.08696400  |
| H | -1.99823100 | -3.59049900 | 0.33706800  |
| H | -1.22570200 | 1.29721700  | -0.01337000 |
| H | 2.81384100  | -2.83613200 | 0.21094900  |
| H | -3.91469100 | -2.06592100 | 0.26385600  |
| H | -0.00849900 | -4.74857600 | -0.50162900 |
| H | 0.01872500  | -4.62821000 | 1.25472900  |
| H | 1.53952400  | -4.81134000 | 0.36128900  |
| H | -3.64928700 | 1.56056000  | 0.00480700  |
| H | -4.72440900 | 0.17568800  | 0.12247800  |
| C | 2.26680400  | 2.81879400  | -2.14999900 |
| H | 2.10672300  | 3.73747900  | -2.71750400 |
| H | 2.54076000  | 2.02297700  | -2.85329300 |

|   |             |             |             |
|---|-------------|-------------|-------------|
| H | 3.09898900  | 2.97946700  | -1.45522500 |
| O | 1.05954500  | 2.52870700  | -1.46751900 |
| H | 1.18427200  | 1.72084400  | -0.95868200 |
| C | -7.25804200 | -0.85703500 | -0.91875700 |
| H | -6.61876300 | -1.00129100 | -1.79054800 |
| H | -7.84309500 | 0.05780000  | -1.05898000 |
| H | -7.93804500 | -1.71100900 | -0.83701900 |
| O | -6.40320400 | -0.76480400 | 0.21346700  |
| H | -6.94150000 | -0.63584200 | 0.99819600  |
| C | 4.29529400  | 2.00590600  | 2.40322900  |
| H | 4.62565200  | 2.94780400  | 2.84650000  |
| H | 3.51797200  | 1.57810800  | 3.04938400  |
| H | 5.14982000  | 1.31739000  | 2.38532000  |
| O | 3.81230500  | 2.28648100  | 1.10532600  |
| H | 3.51750300  | 1.45161800  | 0.70917400  |
| C | -2.75988100 | 4.17806400  | 0.99768500  |
| H | -3.00714700 | 5.24153100  | 0.91836500  |
| H | -3.24199400 | 3.77251400  | 1.88795500  |
| H | -1.67552700 | 4.06718900  | 1.10295100  |
| O | -3.25693600 | 3.44595900  | -0.11518400 |
| H | -2.84407900 | 3.78033300  | -0.91528400 |
| C | 6.19354500  | -0.81945400 | -1.41055500 |
| H | 7.20467100  | -1.21646500 | -1.52462800 |
| H | 5.60241700  | -1.13546100 | -2.27984100 |
| H | 6.25434700  | 0.27653600  | -1.41268000 |
| O | 5.66668000  | -1.31948400 | -0.19904100 |
| H | 4.76693800  | -0.96861900 | -0.09674500 |

**S7. The calculated results of the Enthalpies variation ( $\Delta H_{298}$ ) and Gibbs free energy variation ( $\Delta G_{298}$ ) for reactions forming complexes from F1 and MeOH**

| Complexes                          | $\Delta H_{298}$ (Kcal/mol) | $\Delta G_{298}$ (Kcal/mol) |
|------------------------------------|-----------------------------|-----------------------------|
| <b>F1: MeOH molar ratio of 1:1</b> |                             |                             |
| <b>F1-1-MeOH-1</b>                 | -2.99                       | 4.50                        |
| <b>F1-1-MeOH-2</b>                 | -3.06                       | 4.01                        |
| <b>F1-1-MeOH-3</b>                 | -2.15                       | 5.32                        |
| <b>F1-1-MeOH-4</b>                 | -2.09                       | 4.65                        |

|                                    |        |       |
|------------------------------------|--------|-------|
| <b>F1: MeOH molar ratio of 1:2</b> |        |       |
| <b>F1-2-MeOH-1</b>                 | -6.38  | 8.84  |
| <b>F1-2-MeOH-2</b>                 | -6.43  | 8.46  |
| <b>F1-2-MeOH-3</b>                 | -3.85  | 12.16 |
| <b>F1-2-MeOH-4</b>                 | -5.70  | 9.17  |
| <b>F1-2-MeOH-5</b>                 | -5.67  | 9.02  |
| <b>F1-2-MeOH-6</b>                 | -5.95  | 9.57  |
| <b>F1-2-MeOH-7</b>                 | -5.88  | 9.31  |
| <b>F1-2-MeOH-8</b>                 | -5.83  | 9.22  |
| <b>F1-2-MeOH-9</b>                 | -5.79  | 8.90  |
| <b>F1-2-MeOH-10</b>                | -4.42  | 9.81  |
| <b>F1: MeOH molar ratio of 1:3</b> |        |       |
| <b>F1-3-MeOH-1</b>                 | -8.20  | 14.07 |
| <b>F1-3-MeOH-2</b>                 | -8.33  | 14.09 |
| <b>F1-3-MeOH-3</b>                 | -6.65  | 16.05 |
| <b>F1-3-MeOH-4</b>                 | -7.39  | 18.12 |
| <b>F1-3-MeOH-5</b>                 | -9.20  | 12.38 |
| <b>F1-3-MeOH-6</b>                 | -11.04 | 16.26 |
| <b>F1-3-MeOH-7</b>                 | -6.91  | 15.62 |
| <b>F1: MeOH molar ratio of 1:4</b> |        |       |
| <b>F1-4-MeOH-1</b>                 | -9.19  | 21.40 |
| <b>F1-4-MeOH-2</b>                 | -11.66 | 18.07 |
| <b>F1-4-MeOH-3</b>                 | -9.84  | 19.33 |
| <b>F1-4-MeOH-4</b>                 | -9.90  | 20.38 |
| <b>F1-4-MeOH-5</b>                 | -11.68 | 18.52 |
| <b>F1: MeOH molar ratio of 1:5</b> |        |       |

|             |        |       |
|-------------|--------|-------|
| F1-5-MeOH-1 | -12.41 | 25.30 |
|-------------|--------|-------|

**S8. The coordinates of the optimized geometry for the ES of F1-1-MeOH-2**

|   |             |             |             |
|---|-------------|-------------|-------------|
| O | 0.77200300  | -0.28280800 | -0.09082600 |
| O | 2.64747700  | 0.90299000  | -0.13368600 |
| N | -3.02716400 | -3.06117100 | 0.00763400  |
| C | -1.41177600 | 0.79484300  | 0.01109500  |
| C | -0.79961400 | 2.08942200  | 0.01378600  |
| C | -0.58440400 | -0.36484900 | -0.04091600 |
| C | -2.81976800 | 0.57972800  | 0.05852100  |
| C | -1.11164200 | -1.63101100 | -0.04370900 |
| C | -2.52085100 | -1.81581000 | 0.00711600  |
| C | 0.60312200  | 2.11602000  | -0.03624500 |
| C | -3.36701900 | -0.68200700 | 0.05713600  |
| C | -1.62036000 | 3.32758500  | 0.06951500  |
| C | 1.40962500  | 0.96393100  | -0.08805500 |
| H | -3.47517000 | 1.44163700  | 0.09741800  |
| H | -0.44568200 | -2.48571500 | -0.08468800 |
| H | 1.13538600  | 3.06120700  | -0.03622300 |
| H | -4.44220700 | -0.81832300 | 0.09503400  |
| H | -2.24405300 | 3.36646500  | 0.97390400  |
| H | -2.30831500 | 3.40335600  | -0.78447700 |
| H | -0.98468800 | 4.21493900  | 0.06489500  |
| H | -2.42933300 | -3.87271200 | -0.02599500 |
| H | -4.02254200 | -3.22000700 | 0.04387100  |
| C | 5.42782000  | -1.01477100 | 0.20809500  |
| H | 6.06409500  | -1.90298900 | 0.22611500  |
| H | 5.50225500  | -0.52360900 | 1.18757600  |
| H | 5.82435300  | -0.32805200 | -0.55169200 |
| O | 4.11078900  | -1.42696700 | -0.08226600 |
| H | 3.54309600  | -0.63219600 | -0.10297600 |
